# Supplementary material for: Understanding each other's models: an introduction and a standard representation of 16 global water models to support intercomparison, improvement, and communication
Source: Copernicus journal article supplement (doi:10.5194/gmd-14-3843-2021), 2021-06-24
Supplement: Supplementary file 1 [file gmd-14-3843-2021-supplement.pdf]

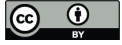

*Supplement of*

**Understanding each other's models: an introduction and a standard representation of 16 global water models to support intercomparison, improvement, and communication**

**Camelia-Eliza Telteu et al.**

*Correspondence to:* Camelia-Eliza Telteu ([camelia.telteu@gmail.com](mailto:camelia.telteu@gmail.com), [telteu@em.uni-frankfurt.de](mailto:telteu@em.uni-frankfurt.de))

The copyright of individual parts of the supplement might differ from the article licence.

## List of symbols

- $a$  soil exponent (unitless). See table S25. 51
- $a_i$  soil exponent per layer  $i$  (unitless). See table S25. 51
- $a_{uz}$  exponent for the unsaturated zone (unitless). See table S26. 52
- 5  $A$  water abstraction ( $L^3 L^{-2} T^{-1}$ ). See tables S32, S35. 58, 61
- $A_{act}^{gw}$  actual groundwater abstraction ( $L^3 L^{-2} T^{-1}$ ). See table S53. 79
- $A_{act}^{sw}$  actual surface water abstraction ( $L^3 L^{-2} T^{-1}$ ). See table S53. 79
- $A_{act,irr}$  actual water abstraction for irrigation ( $L^3 L^{-2} T^{-1}$ ). See table S43. 69
- $A_{dem,dam}$  mean annual total water demand of the dam ( $L^3 T^{-1}$ ). See table S37. 63
- 10  $A_{dem,5dcells}$  long term averaged water demand of 5 downstream cells of a reservoir ( $L^3 T^{-1}$ ). See table S37. 63
- $A_{dem,5dcells,month}$  mean water demand of 5 downstream cells of a reservoir averaged over a specific month ( $L^3 T^{-1}$ ). See table S37. 63
- $A_{dom}$  water abstraction for domestic sector ( $L^3 L^{-2} T^{-1}$ ). See tables S35, S59, S60, S61, S62, S63, S64. 61, 85–91, 93, 95, 97, 98, 100
- 15  $A_{dom}^{aq}$  water abstraction from river for domestic sector, at the origin of an aqueduct ( $L^3 L^{-2} T^{-1}$ ). See table S62. 88
- $A_{dom}^{gw}$  water abstraction from groundwater storage for domestic sector ( $L^3 L^{-2} T^{-1}$ ). See tables S29, S59, S60 S61, S77. 55, 85–87, 103
- $A_{dom}^{gw,nrw}$  water abstraction from non-renewable groundwater storage for domestic sector ( $L^3 L^{-2} T^{-1}$ ). See table S59. 85
- $A_{dom}^{gw,rw}$  water abstraction from renewable groundwater storage for domestic sector ( $L^3 L^{-2} T^{-1}$ ). See table S59. 85
- 20  $A_{dom}^{pond}$  water abstraction from pond, from local reservoir, for domestic sector ( $L^3 L^{-2} T^{-1}$ ). See tables S35, S62. 61, 88
- $A_{dom}^{re}$  water abstraction from reservoir for domestic sector ( $L^3 L^{-2} T^{-1}$ ). See tables S62, S79. 88, 105
- $A_{dom}^{ri}$  water abstraction from river for domestic sector ( $L^3 L^{-2} T^{-1}$ ). See tables S43, S62. 72, 88
- $A_{dom}^{sw}$  water abstraction from surface water bodies for domestic sector ( $L^3 L^{-2} T^{-1}$ ). See tables S43, S59, S62, S63, S64, S78, S79, S80. 69, 85, 88–90, 104–106
- 25  $A_{dom}^{usw}$  water abstraction from unlimited (unspecified) surface water source for domestic sector ( $L^3 L^{-2} T^{-1}$ ). See table S62. 88
- $A_{dom,cons}$  water consumption from domestic sector ( $L^3 L^{-2} T^{-1}$ ). See tables S59. 86, 87, 89, 90, 92, 97, 100
- $A_{dom,cons}$  domestic consumption ( $L^3 L^{-2} T^{-1}$ ). See tables S60, S61, S63. 86, 87, 89, 96, 99
- $A_{dom,cons}^{sw}$  domestic surface water consumption ( $L^3 L^{-2} T^{-1}$ ). See table S63. 89
- 30  $A_{dom,cons}^{gw}$  domestic groundwater consumption ( $L^3 L^{-2} T^{-1}$ ). See table S60. 86
- $A_{dom,dem}$  water demand for domestic sector ( $L^3 T^{-1}$ ). See tables S59, S60, S61, S62, S63, S78, S79. 85–89, 104, 105

- $A_{dom,loss}^{sw}$  domestic surface water losses ( $L^3 L^{-2} T^{-1}$ ). See table S63. 89
- $A_{dom,loss}^{gw}$  domestic groundwater losses ( $L^3 L^{-2} T^{-1}$ ). See table S60. 86
- $A_{dom,month}$  monthly water abstraction for domestic sector ( $L^3 L^{-2} T^{-1}$ ). See tables S37, S79. 63, 105
- 35  $A_{dom,rf}$  return flow from domestic sector ( $L^3 L^{-2} T^{-1}$ ). See tables S60, S61, S63, S64. 86, 87, 89, 90
- $A_{dom,rf}^{gw}$  return flow from domestic groundwater abstraction ( $L^3 L^{-2} T^{-1}$ ). See tables S61, S60. 86, 87
- $A_{dom,rf}^{sw}$  return flow from domestic surface water abstraction ( $L^3 L^{-2} T^{-1}$ ). See tables S64, S63. 89, 90
- $A_{dom}^{re,global}$  water abstraction from a global reservoir for domestic sector ( $L^3 L^{-2} T^{-1}$ ). See tables S35, S62. 61, 88
- 40  $A_{ele}^{sw}$  water abstraction from surface water bodies for electricity sector ( $L^3 L^{-2} T^{-1}$ ). See tables S75, S76, S78, S79, S80. 101, 102, 104–106
- $f_A^{sw}$  abstraction surface water ( $L^3 L^{-2} T^{-1}$ ). See table S59. 85, 86, 88, 89, 91–93, 95, 96, 98, 99
- $A_{fgw}$  fossil groundwater abstraction ( $L^3 L^{-2} T^{-1}$ ). See table S53. 79
- $A_{gw}$  water abstraction from groundwater storage ( $L^3 L^{-2} T^{-1}$ ). See tables S29, S77. 55, 103
- $A_{gw,cons}$  groundwater consumption ( $L^3 L^{-2} T^{-1}$ ). See table S54. 80
- 45  $A_{gw,rw}$  water abstraction from renewable groundwater storage ( $L^3 L^{-2} T^{-1}$ ). See table S53. 79
- $A_{hil,G}$  household, industry, and livestock demand, at the grid cell (G) ( $L^3 L^{-2} T^{-1}$ ). See tables S78, S79. 104, 105
- $A_{ind}$  water abstraction for industry sector ( $L^3 L^{-2} T^{-1}$ ). See tables S35, S81, S59. 61, 85, 87, 88, 90, 91, 93, 95, 97, 98, 100, 107
- $A_{ind}^{gw}$  groundwater abstraction for industry sector ( $L^3 L^{-2} T^{-1}$ ). See tables S77, S69, S70. 95, 96, 103
- 50  $A_{ind}^{pond}$  water abstraction from pond, local reservoir, for industry sector ( $L^3 L^{-2} T^{-1}$ ). See tables S35, S72. 61, 98
- $A_{ind}^{re}$  water abstraction from reservoir for industry sector ( $L^3 L^{-2} T^{-1}$ ). See table S79. 105
- $A_{ind}^{ri}$  water abstraction from river for industry sector ( $L^3 L^{-2} T^{-1}$ ). See tables S46, S72. 72, 98
- $A_{ind}^{sw}$  surface water abstraction for industry sector ( $L^3 L^{-2} T^{-1}$ ). See tables S69, S72, S73, S75. 95, 98, 99
- $A_{ind,cons}$  water consumption from industry sector ( $L^3 L^{-2} T^{-1}$ ). See tables S59. 86, 87, 89, 90, 92, 96, 97, 99, 100
- 55  $A_{ind,cons}^{sw}$  surface water consumption for industry sector ( $L^3 L^{-2} T^{-1}$ ). See tables S73. 99
- $A_{ind,cons}^{gw}$  groundwater consumption for industry sector ( $L^3 L^{-2} T^{-1}$ ). See tables S70. 96
- $A_{ind,dem}$  water demand abstraction for industry sector ( $L^3 T^{-1}$ ). See tables S69, S78, S79. 95, 104, 105
- $A_{ind,month}$  monthly water abstraction for industry sector ( $L^3 L^{-2} T^{-1}$ ). See tables S37, S79. 63, 105
- $A_{ind}^{re,global}$  water abstraction from a global reservoir for industry sector ( $L^3 L^{-2} T^{-1}$ ). See tables S35, S72. 61, 98
- 60  $A_{irr}$  water abstraction for irrigation sector ( $L^3 L^{-2} T^{-1}$ ). See tables S1, S35, S43, S52, S59, S53, S54, S55, S56, S57, S58. 27, 61, 78, 80–85, 88, 91, 93, 95, 98, 106

- $A_{irr}^{aq}$  water abstraction from river for irrigation sector, at the origin of an aqueduct ( $L^3 L^{-2} T^{-1}$ ). See table S56. 82
- $A_{irr}^{gw}$  water abstraction from groundwater storage for irrigation sector ( $L^3 L^{-2} T^{-1}$ ). See tables S29, S53, S54, S55, S77. 55, 78–81, 103
- 65  $A_{irr}^{gw,nrw}$  water abstraction from non-renewable groundwater storage for irrigation sector ( $L^3 L^{-2} T^{-1}$ ). See table S53. 79
- $A_{irr}^{gw,rw}$  water abstraction for irrigation sector taken from renewable groundwater storage ( $L^3 L^{-2} T^{-1}$ ). See table S53. 79
- $A_{irr}^{la}$  water abstraction for irrigation sector taken from lake ( $L^3 L^{-2} T^{-1}$ ). See table S56. 82
- $A_{irr}^{neigh,cell}$  water abstraction for irrigation sector taken from neighboring cell surplus ( $L^3 L^{-2} T^{-1}$ ). See table S56. 82
- $A_{irr}^{pond}$  water abstraction for irrigation sector taken from pond, local reservoir ( $L^3 L^{-2} T^{-1}$ ). See tables S35, S56. 61, 82
- 70  $A_{irr}^{re}$  water abstraction from reservoir for irrigation sector ( $L^3 L^{-2} T^{-1}$ ). See tables S56, S79. 82, 105
- $A_{irr}^{ri}$  water abstraction for irrigation from river ( $L^3 L^{-2} T^{-1}$ ). See tables S46, S56. 72, 82
- $A_{irr}^{sw}$  water abstraction for irrigation sector taken from surface water ( $L^3 L^{-2} T^{-1}$ ). See tables S43, S53, S56, S57, S58, S78, S79, S80. 69, 78, 79, 82–84, 104–106
- $A_{irr}^{usw}$  irrigation surface water abstraction from unlimited (unspecified) surface water source ( $L^3 L^{-2} T^{-1}$ ). See table S56. 82
- 75  $A_{irr,app}$  application requirement for an irrigation system due to irrigation conveyance inefficiencies ( $L^3 L^{-2} T^{-1}$ ). See tables S57, S58. 78, 83, 84
- $A_{irr,cons}$  water consumption from irrigation sector ( $L^3 L^{-2} T^{-1}$ ). See tables S53, S54, S56, S57. 79–83, 86, 89, 92, 96, 99
- $A_{irr,cons,G}^{sw}$  irrigation surface water consumption, at the grid cell ( $L^3 L^{-2} T^{-1}$ ). See tables S57, S58. 104, 105
- $A_{irr,cons}^{sw}$  irrigation surface water consumption ( $L^3 L^{-2} T^{-1}$ ). See tables S57, S58. 83, 84, 104, 105
- 80  $A_{irr,cons}^{gw}$  irrigation groundwater consumption ( $L^3 L^{-2} T^{-1}$ ). See tables S54, S55. 80, 81
- $A_{irr,dem}$  water demand for irrigation sector ( $L^3 T^{-1}$ ). See tables S53, S78, S79. 79, 104, 105
- $A_{irr,loss}^{sw}$  irrigation surface water losses ( $L^3 L^{-2} T^{-1}$ ). See table S57. 83
- $A_{irr,month}$  monthly water abstraction for irrigation sector ( $L^3 L^{-2} T^{-1}$ ). See tables S37, S79. 63, 105
- $A_{irr,net}$  daily net irrigation requirement. Amount of water required in the upper 50 cm soil to avoid crop water limitation ( $L^3 L^{-2} T^{-1}$ ). See tables S57, S58. 78, 83, 84
- 85  $A_{irr,rf}^{gw}$  return flow from irrigation groundwater abstraction ( $L^3 L^{-2} T^{-1}$ ). See table S55. 81
- $A_{irr,rf}^{sw}$  return flow from irrigation surface water abstraction ( $L^3 L^{-2} T^{-1}$ ). See tables S57, S58. 83, 84
- $A_{irr,rf}$  return flow from irrigation sector ( $L^3 L^{-2} T^{-1}$ ). See tables S57, S58. 81
- $A_{irr,rf,firr}$  return flow fraction irrigated (unitless). See tables S55. 81
- 90  $A_{irr}^{re,global}$  water abstraction from a global reservoir for irrigation sector ( $L^3 L^{-2} T^{-1}$ ). See tables S29, S56. 61, 82
- $A_{la}$  water abstraction from lake ( $L^3 L^{-2} T^{-1}$ ). See tables S43, S78, S79. 58, 104, 105
- $A_{liv}$  water abstraction for livestock sector ( $L^3 L^{-2} T^{-1}$ ). See table S35, S59. 85, 86, 88, 89, 91–93, 95, 96, 98, 99

- $A_{liv}^{gw}$  water abstraction for livestock sector taken from groundwater storage ( $L^3 L^{-2} T^{-1}$ ). See tables S29, S65. 55, 91
- 95  $A_{liv}^{sw}$  water abstraction for livestock sector taken from surface water ( $L^3 L^{-2} T^{-1}$ ). See tables S43, S67, S78, S79, S80. 69, 93, 104–106
- $A_{liv,cons}$  water consumption for livestock sector ( $L^3 L^{-2} T^{-1}$ ). See tables S66, S68. 92, 94
- $A_{liv,cons}^{gw}$  water consumption use for livestock sector taken from groundwater ( $L^3 L^{-2} T^{-1}$ ). See table S66. 92
- $A_{liv,cons}^{sw}$  water consumption use for livestock sector taken from surface water ( $L^3 L^{-2} T^{-1}$ ). See tables S67, S68. 93, 94
- $A_{liv,dem}$  water demand for livestock sector ( $L^3 T^{-1}$ ). See tables S65, S66, S67, S68, S78, S79. 91–94, 104, 105
- 100  $A_{man,rf}^{gw}$  return flow for manufacturing groundwater abstraction ( $L^3 L^{-2} T^{-1}$ ). See tables S71, S70. 96, 97
- $A_{man,rf}^{sw}$  return flow for manufacturing from surface water abstraction ( $L^3 L^{-2} T^{-1}$ ). See tables S74, S73. 99, 100
- $A_{man}^{aq}$  water abstraction for manufacturing sector from river, at the origin of an aqueduct ( $L^3 L^{-2} T^{-1}$ ). See table S72. 98
- $A_{man}^{cool,c}$  manufacturing cooling water per country ( $L^3 T^{-1}$ ). See tables S70, S71, S73, S74. 96, 97, 99, 100
- $A_{man}^c$  water abstraction for manufacturing sector per country ( $L^3 T^{-1}$ ). See tables S69, S70, S72, S73. 95, 96, 98, 99
- 105  $A_{man}^{gw,nrw}$  water abstraction for manufacturing sector taken from non-renewable groundwater storage ( $L^3 L^{-2} T^{-1}$ ). See table S69. 95
- $A_{man}^{gw,rw}$  water abstraction for manufacturing sector taken from renewable groundwater storage ( $L^3 L^{-2} T^{-1}$ ). See table S69. 95
- $A_{man}^{re}$  water abstraction from reservoir for manufacturing sector ( $L^3 L^{-2} T^{-1}$ ). See table S72. 98
- 110  $A_{man}^{ri}$  water abstraction from river for manufacturing sector ( $L^3 L^{-2} T^{-1}$ ). See table S72. 98
- $A_{man}^{sw}$  water abstraction for manufacturing sector taken from surface water ( $L^3 L^{-2} T^{-1}$ ). See tables S43, S72, S73, S74, S78, S79, S80. 69, 98–100, 104–106
- $A_{man}^{usw}$  manufacturing surface water abstraction from unlimited (unspecified) surface water source ( $L^3 L^{-2} T^{-1}$ ). See table S72. 98
- 115  $A_{man}^{ww,c}$  manufacturing wastewater per country ( $L^3 T^{-1}$ ). See tables S70, S71, S73, S74. 96, 97, 99, 100
- $A_{man,cons}$  water consumption for manufacturing sector ( $L^3 L^{-2} T^{-1}$ ). See tables S70, S71, S73. 96, 97, 99
- $A_{man,cons}^{gw}$  water consumption for manufacturing sector taken from groundwater storage ( $L^3 L^{-2} T^{-1}$ ). See table S70. 96
- $A_{man,cons}^{sw}$  water consumption for manufacturing sector taken from surface water ( $L^3 L^{-2} T^{-1}$ ). See table S73. 99
- $A_{man,dem}$  water demand for manufacturing sector ( $L^3 T^{-1}$ ). See tables S69, S70, S71, S72 S73. 95–99
- 120  $A_{man,loss}^{gw}$  manufacturing groundwater losses ( $L^3 L^{-2} T^{-1}$ ). See table S70. 96
- $A_{man,loss}^{sw}$  manufacturing surface water losses ( $L^3 L^{-2} T^{-1}$ ). See table S73. 99
- $A_{man,rf}^c$  return flow for manufacturing abstraction per country ( $L^3 L^{-2} T^{-1}$ ). See tables S71, S70. 96, 99
- $A_{man}^{gw}$  water abstraction for manufacturing sector taken from groundwater storage ( $L^3 L^{-2} T^{-1}$ ). See tables S29, S69, S70, S71. 55, 95–97

- 125  $A_{muni}$  water abstraction for municipal sector ( $L^3 L^{-2} T^{-1}$ ). See table S81. 107
- $A_{ocean}$  seawater abstraction ( $L^3 L^{-2} T^{-1}$ ). See tables S81, S82, S83. 107–109
- $A_{ocean,cons}$  seawater consumption ( $L^3 L^{-2} T^{-1}$ ). See table S82. 108
- $A_{ocean,rf}$  return flow from seawater abstraction ( $L^3 L^{-2} T^{-1}$ ). See table S83. 109
- $A_{pot}^{gw}$  potential groundwater abstraction ( $L^3 L^{-2} T^{-1}$ ). See table S53. 79
- 130  $A_{re}$  water abstraction from local reservoir ( $L^3 L^{-2} T^{-1}$ ). See tables S35, S79. 61, 105
- $A_{rf}$  return flow from water abstraction ( $L^3 L^{-2} T^{-1}$ ). See table S32. 58, 61, 69
- $A_{rf,nonirr}$  return flow non-irrigated areas to river ( $L^3 L^{-2} T^{-1}$ ). See table S59. 87, 90, 97, 100
- $A_{rf,nonirr,eva}$  return flow non-irrigated which is evaporated ( $L^3 L^{-2} T^{-1}$ ). See table S59. 87, 90, 97, 100
- $A_{ri}$  water abstraction from river ( $L^3 L^{-2} T^{-1}$ ). See tables S43, S80. 69, 106
- 135  $A_{sw,cons}$  surface water consumption ( $L^3 L^{-2} T^{-1}$ ). See table S54. 80
- $A_{tot}$  total abstraction ( $L^3 L^{-2} T^{-1}$ ). See tables S29, S53. 55, 79
- $A_{tot,cons}$  total consumption ( $L^3 L^{-2} T^{-1}$ ). See table S54. 80
- $A_{tot,cons}^{gw}$  total consumption from groundwater ( $L^3 L^{-2} T^{-1}$ ). See table S60, S66, S70. 86, 92, 96
- $A_{tot,cons}^{sw}$  total consumption from surface water ( $L^3 L^{-2} T^{-1}$ ). See table S63, S68, S73. 89, 99
- 140  $A_{tot}^{gw}$  total abstraction from groundwater ( $L^3 L^{-2} T^{-1}$ ). See tables S59, S65, S69. 85, 91, 95
- $A_{tot}^{sw}$  total abstraction from surface water ( $L^3 L^{-2} T^{-1}$ ). See tables S62, S67, S72. 88, 93, 98
- $AET$  total amount of water from transpiration, evaporation, interception losses, and sublimation ( $L^3 L^{-2} T^{-1}$ ). See tables S1, S11, S20. 27, 37, 46
- $b_{weir}$  width weir (L). See tables S34, S37. 60, 63
- 145  $B$  area ( $L^2$ ). See tables S35, S46. 61, 72
- $B_{calm}$  fraction of the calm areas (unitless). See table S21. 47
- $B_G$  area of a grid cell ( $L^2$ ). See table S29, S43. 55, 69
- $B_{la,global}$  global lake area ( $L^2$ ). See table S32. 58
- $B_{la,global,max}$  maximum global lake area ( $L^2$ ). See tables S32, S49. 58, 77
- 150  $B_{la,local}$  local lake area ( $L^2$ ). See table S32. 58
- $B_{la,local,max}$  maximum local lake area ( $L^2$ ). See tables S32, S49. 58, 77
- $B_{re}$  reservoir area ( $L^2$ ). See tables S35, S38. 61, 64
- $B_{re,max}$  maximum reservoir area ( $L^2$ ). See table S35. 61
- $B_{stormy}$  fraction of the stormy areas (unitless). See tables S4, S21. 30, 47

- 155  $B_{we,global}$  global wetland area ( $L^2$ ). See table S39. 65
- $B_{we,global,max}$  maximum global wetland area ( $L^2$ ). See tables S39, S49. 65, 77
- $B_{we,local}$  local wetland area ( $L^2$ ). See table S39. 65
- $B_{we,local,max}$  maximum local wetland area ( $L^2$ ). See tables S39, S49. 65, 77
- $c_{air}$  specific heat of air (unitless). See tables S2, S7, S11, S23, S24. 28, 33, 37, 49, 50
- 160  $c_{ice}$  specific heat ice (unitless). See tables S10, S12. 36, 38
- $C_{bulk}$  bulk transfer coefficient (unitless). See table S2. 28
- $C_{bulk,Eg}$  bulk coefficient for evaporation from snow-free ground (unitless). See table S11. 37
- $C_{bulk,Eg}^{sn}$  bulk coefficient for evaporation from snow-covered ground (unitless). See table S11. 37
- $C_{bulk,Ei}$  bulk coefficient for evaporation, from intercepted liquid water by canopy (unitless). See table S7. 33
- 165  $C_{bulk,Ei}^{sn}$  bulk coefficient for evaporation, from intercepted snow by canopy (unitless). See table S7. 33
- $C_{B,red}$  area reduction factor (unitless). See tables S32, S35, S39. 58, 61, 65
- $C_{crop}$  crop coefficient (unitless). See tables S23, S24. 49, 50
- $C_{cropGN}$  crop group number (GN) is an indicator of adaptation to dry climate (unitless). See table S23. 49
- $C_{dam,G}$  allocation coefficient for grid cell that can be supply by more than one dam (unitless). See table S37. 63
- 170  $C_{dom}^{wu,ints}$  domestic water use intensity ( $L^3 \text{ capita}^{-1} \text{ T}^{-1}$ ). See tables S59, S62. 85, 88
- $C_{dom,cons}$  domestic consumptive use coefficient (unitless). See tables S60, S61, S63, S64. 86, 87, 89, 90
- $C_{ele}^{techchange}$  technological change rate for the electricity sector (unitless). See tables S75, S76. 101, 102
- $C_{gw,Q}$  groundwater outflow coefficient or recession coefficient of groundwater zone ( $T^{-1}$ ). See table S31. 57
- $C_{gw,rech}^{sw}$  groundwater recharge rate below surface water bodies ( $L^3 L^{-2} T^{-1}$ ). See tables S32, S35, S39. 58, 61, 65
- 175  $C_H$  surface exchange coefficient for sensible and latent heat fluxes between the surface and the lowest atmospheric level (unitless). See tables S23, S24. 49, 50
- $C_{ice}$  ice impedance coefficient determined from the ice content of the soil layers (unitless). See table S31. 57
- $C_{liv}^{w,req}$  livestock specific animal water requirement ( $L^3 \text{ capita}^{-1} \text{ T}^{-1}$ ). See table S68. 94
- $C_m$  degree-day factor ( $L \Theta^{-1} \text{ T}^{-1}$ ). See table S12. 38
- 180  $C_{m,season}$  seasonal degree-day factor (unitless). See table S12. 38
- $C_{man}^{w,ints,2005}$  manufacturing structural water intensity of 2005 per country ( $L^3 \text{ money}^{-1}$ ). See tables S69, S70, S72, S73. 95, 96, 98, 99
- $C_{man,cons}$  manufacturing consumptive use coefficient (unitless). See tables S73, S70, S74, S71. 96, 97, 99, 100
- $C_{man}^{tech,cr}$  technological change rate for the manufacturing sector (unitless). See tables S69, S70, S72, S73. 95, 96, 98, 99

- 185  $C_{month}$  monthly provisional release coefficient ( $L^{-3} T^{-1}$ ). See table S37. 63
- $C_M$  Manning's roughness coefficient for river bed (unitless). See table S46. 72
- $C_{M1}$  Manning coefficient 1 (unitless). See table S46. 72
- $C_{M2}$  Manning coefficient 2 (unitless). See table S46. 72
- $C_{M3}$  Manning coefficient 3 (unitless). See table S46. 72
- 190  $C_{MS,we}$  Manning-Strickler coefficient for wetlands (unitless). See table S39. 68
- $C_{P,l}$  extinction coefficient for rainfall (unitless). See table S5, S4. 30, 31
- $C_{P,th}$  throughfall coefficient (unitless). See table S5. 31
- $C_{PT}$  Priestley-Taylor coefficient: 1.26 in humid areas, 1.74 in semiarid / arid areas Kaspar [26] (unitless). See table S2. 28
- $C_{ri,hydraulic}$  hydraulic radius coefficient of the river channel (L). See table S46. 72
- 195  $C_{so,F}$  reduction factor for frozen soil (unitless). See table S13. 39
- $C_{so,i}$  soil matric potential coefficient (unitless). See table S28. 54
- $C_{su}$  surface drag coefficient (unitless). See tables S7, S11, S23, S24. 33, 37, 49, 50
- $C_{sw,out}$  surface water outflow coefficient ( $T^{-1}$ ). See tables S34, S42. 60, 68
- $C_{tot}$  total annual release coefficient ( $L^{-3} T^{-1}$ ). See table S37. 63
- 200  $C_{weir}$  coefficient friction of the reservoir weir (unitless). See tables S34, S37, S45, S46. 60, 63, 71, 72
- $C_{ws}$  reduction factor because of water stress (unitless). See table S23. 49
- $C_{year}$  yearly release coefficient ( $L^{-3} T^{-1}$ ). See table S37. 63
- $d_0$  threshold depth (L). See table S31. 57
- $d_{n,i}$  layer  $i$  node depth (L). See table S13. 39
- 205  $d_{n,i+1}$  layer  $i + 1$  node depth (L). See table S13. 39
- $d_{paddy}^{sw}$  actual surface water depth for paddy irrigation (L). See table S57. 83
- $d_{paddy,max}^{sw}$  maximal surface water depth for paddy irrigation (L) (50 mm). See table S57. 83
- $d_{sn}$  grid-average of depth of the snow cover (L). See table S13. 39
- $d_{so}$  total soil depth (L). See tables S14, S20, S25, S29, S30. 40, 46, 51, 55, 56
- 210  $d_{so,i}$  soil depth for layer index  $i$  (L). See tables S14, S24, S25, S49. 40, 50, 51, 76
- $d_{so,root}$  rooting depth (L). See tables S18, S22, S49. 44, 48, 76
- $d_{wt}$  water table depth (L). See tables S29, S30, S31. 55–57
- $d_{wt,i}$  depth of the layer  $i$  directly above the water table (L). See table S30. 56
- $D_w$  soil water diffusivity ( $L^2 T^{-1}$ ). See table S14. 40



- 215  $e$  vapor pressure (kPa). See tables S7, S11, S23, S24. 33, 37, 49, 50
- $e_{act}$  actual vapor pressure (kPa). See table S2. 28
- $e_{ca}$  vapor pressure in canopy air space (kPa). See tables S7, S11, S23, S24. 33, 37, 49, 50
- $e_{sat}$  saturation vapor pressure (kPa); for Mac-PDM.20 (mb). See table S2. 28
- $e_{sat,dew}$  saturation vapor pressure at dew point; for Mac-PDM.20 (mb). See table S2. 28
- 220  $E_{ca}$  evaporation, water changes from liquid to vapour, from canopy storage ( $L^3 L^{-2} T^{-1}$ ). See tables S1, S3, S5, S7, S9, S23, S24. 27, 29, 31, 33, 35, 46, 50
- $E_{ca}^{sn,cov}$  evaporation from snow-covered canopy ( $L^3 L^{-2} T^{-1}$ ). See table S1. 27
- $E_{ca}^{sn,free}$  evaporation from snow-free canopy ( $L^3 L^{-2} T^{-1}$ ). See table S1. 27
- 225  $E_{ca,l}$  amount of water, from rainfall, accumulated on the vegetation that changes from liquid to vapor ( $L^3 L^{-2} T^{-1}$ ). See tables S3, S7, S10. 29, 33, 36
- $E_{ca,max}$  maximum amount of water accumulated on the vegetation that changes from liquid to vapor ( $L^3 L^{-2} T^{-1}$ ). See table S7. 33
- $E_{ca,s}$  amount of water, from snowfall, accumulated on the vegetation that changes from solid to vapor ( $L^3 L^{-2} T^{-1}$ ). See tables S3, S7, S9. 29, 33, 35
- 230  $E_{dew}$  liquid dew, accumulated on the ground or snow that changes from vapor to liquid ( $L^3 L^{-2} T^{-1}$ ). See tables S8, S10. 34, 36
- $E_{eq}$  evaporation at the equilibrium ( $L^3 L^{-2} T^{-1}$ ). See table S24. 50
- $E_{floodplain}$  evaporation from floodplain, it can be wetland ( $L^3 L^{-2} T^{-1}$ ). See table S1. 27
- $E_{la}$  evaporation from lake storage ( $L^3 L^{-2} T^{-1}$ ). See tables S1, S32, S33, S45, S47. 27, 58, 59, 71, 73
- 235  $E_{la,pot}$  potential evaporation from lake storage ( $L^3 L^{-2} T^{-1}$ ). See tables S33, S47. 59, 73
- $E_{lfsm}$  leaf and stem surface evaporation ( $L^3 L^{-2} T^{-1}$ ). See table S9. 35
- $E_{osw}$  evaporation from open water surfaces ( $L^3 L^{-2} T^{-1}$ ). See tables S57, S58. 83, 84
- $E_{re}$  evaporation from reservoir storage ( $L^3 L^{-2} T^{-1}$ ). See tables S1, S35, S38, S45. 27, 61, 64, 71
- $E_{re,pot}$  potential evaporation from reservoir storage ( $L^3 L^{-2} T^{-1}$ ). See table S38. 64
- 240  $E_{ri}$  evaporation from river storage ( $L^3 L^{-2} T^{-1}$ ). See tables S1, S47. 27, 73
- $E_{sn}$  sublimation, water that changes from solid (snow and ice) to vapor ( $L^3 L^{-2} T^{-1}$ ). See tables S1, S8, S9, S11, S12. 27, 34, 35, 37, 38
- $E_{sn}^{covgr}$  sublimation on snow covered ground ( $L^3 L^{-2} T^{-1}$ ). See table S11. 37
- $E_{sn}^{freegr}$  sublimation on snow free ground ( $L^3 L^{-2} T^{-1}$ ). See table S11. 37
- 245  $E_{sn,so}$  sublimation on soil, water that changes from solid (snow and ice) to vapor ( $L^3 L^{-2} T^{-1}$ ). See tables S10. 36
- $E_{sn,SG_i}$  sublimation in a subgrid cell Müller Schmied et al. [34] ( $L^3 L^{-2} T^{-1}$ ). See tables S8, S11. 34, 37

- $E_{snunderca}$  sublimation under canopy, water that changes from solid (snow and ice) to vapor ( $L^3 L^{-2} T^{-1}$ ). See table S10, S11. 36, 37
- 250  $E_{so}$  soil evaporation, water changes from liquid to vapor ( $L^3 L^{-2} T^{-1}$ ). See tables S1, S8, S11, S14, S23, S24, S25. 27, 34, 37, 40, 49–51
- $E_{so,i}$  soil evaporation from soil layer  $i$  ( $L^3 L^{-2} T^{-1}$ ). See table S14. 40
- $E_{so,ice}$  soil evaporation from ground covered with ice ( $L^3 L^{-2} T^{-1}$ ). See table S1. 27
- $E_{so,l}^{sn,freegr}$  soil evaporation from snow free ground ( $L^3 L^{-2} T^{-1}$ ). See tables S1, S24. 27, 50
- $E_{we}$  evaporation from wetland storage ( $L^3 L^{-2} T^{-1}$ ). See tables S1, S39, S41. 27, 65, 67
- 255  $ET_{so,i}$  evapotranspiration from soil layer  $i$  ( $L^3 L^{-2} T^{-1}$ ). See tables S1, S14, S24. 27, 40, 50
- $ET_{so,i-1}$  evapotranspiration from soil layer  $i - 1$  ( $L^3 L^{-2} T^{-1}$ ). See table S24. 50
- $f$  fractional coverage (unitless). See tables S5, S7. 31, 33
- $f_a$  fraction of the tile which is saturated and hence has aerodynamic resistance only (unitless). This represents 1 for lake, ice or snow-covered tiles (unitless). See tables S7, S24. 33, 50
- 260  $f_{ah}$  roughness length of the surface beneath the canopy (unitless). See table S11. 37
- $f_{bu}$  fraction of the built-up areas (unitless). See tables S18, S20, S25. 44, 46, 51
- $f_{BP}$  fraction of the area that receives precipitation rate greater than or equal to precipitation rate (unitless). See table S6. 32
- $f_{ca}$  fraction of the vegetation or canopy class in a grid cell (unitless). See tables S4, S5, S23, S24, S50, S52. 30, 31, 49, 50, 76, 78
- 265  $f_{ca,ex}$  fraction of the exposed canopy (unitless). See table S48. 74
- $f_{ca,G}$  fraction of the vegetation in a grid cell. See table S24. 50
- $f_{ca,max}$  maximum fraction of vegetation type including non-biological fraction (unitless). See table S5. 31
- $f_{ca,n}$  vegetation fractional coverage for the  $n$  vegetation tile. See table S1. 27
- $f_{ca,sn}$  canopy wetness-snow cover fraction (unitless). See tables S7, S11. 33, 37
- 270  $f_{ca,wet}$  fractional wetted area of the canopy (unitless). See table S23. 49
- $f_{cons,A}$  ratio of consumption to abstraction (unitless). See tables S54, S55, S57, S58, S60, S61, S63, S64, S70, S71, S73, S74, S82, S83. 80, 81, 83, 84, 86, 87, 89, 90, 96, 97, 99, 100, 108, 109
- $f_{day,ca,wet}$  fraction of the day-time when the canopy is wet (unitless). See table S23. 49
- $f_{drai}$  drainage decay factor ( $L^{-1}$ ). See table S31. 57
- 275  $f_F$  frozen ration in the uppermost soil layer (unitless). See table S11. 37
- $f_{gw,use}$  sector- and cell-specific groundwater use fraction (unitless). See tables S53, S54, S56, S57, S59, S60, S61, S62, S63, S64, S69, S70, S72, S73. 79, 80, 82, 83, 85–90, 95–100
- $f_{G,sat}$  fraction of the grid area which is saturated (unitless). It is determined by the topographic characteristics and soil moisture state of a grid cell. See tables S22, S58. 48, 84

- 280  $f_{G,unsat}$  fraction of the grid area which is unsaturated (unitless). See table S21. 47
- $f_{h2o}$  fraction of the ground covered by water (unitless). See tables S21, S25. 47, 51
- $f_{hg}$  hydrogeology-related factor (unitless). See table S30. 56
- $f_{if}$  factor interflow (unitless). See table S26. 52
- 285  $f_{irr}$  storage reduction factor due to irrigation water abstraction (unitless). See tables S29, S39, S43, S52, S53, S56. 55, 65, 69, 78, 79, 82
- $f_{irr,eff}$  irrigation efficiency (unitless). See tables S56, S58. 81, 82, 84
- $f_{irr,sw,eff}$  country-specific surface water irrigation efficiency (unitless). See table S56. 82
- $f_{la}$  lake area fraction of the grid cell (unitless). See table S49. 75
- 290  $f_{lost}$  proportion lost during delivery (unitless). See tables S55, S57, S58, S60, S61, S63, S64, S70, S73, S71, S74, S83. 81, 83, 84, 86, 87, 89, 90, 96, 97, 99, 100, 109
- $f_{lost,irr}$  proportion lost during delivery from irrigation sector (unitless). See tables S61. 87, 90, 97, 100
- $f_{LAI}$  interception efficiency of leaf area index (unitless). See tables S4, S9. 30, 35
- $f_{pg}$  permafrost / glacier-related factor (unitless). See table S30. 56
- 295  $f_P$  percentage that receives a precipitation rate greater than or equal to precipitation rate over the fractions of a grid cell (unitless). See table S6. 32
- $f_{Pc,G}$  fraction of the grid cell occupied by convective precipitation (unitless). See tables S5, S20. 31, 46
- $f_{re}$  fraction of the reservoir fill equal to 1 at total storage capacity (unitless). See table S37. 63
- $f_r$  relief-related factor (unitless). See table S30. 56
- $f_{ri,sat}$  river channel fraction in the saturated area (unitless). See table S22. 48
- 300  $f_{root,i}$  fraction of the roots per soil layer  $i$  (unitless). See table S24. 50
- $f_R$  runoff component factor (surface, interflow, baseflow) (unitless). See table S19. 45
- $f_{R_{if,max}}$  fraction of the maximum interflow or subsurface flow (unitless). See table S31. 43
- $f_{R_{in,0}}$  fraction of the area for which the maximum rate of infiltration (infiltration capacity) is less than rate of the infiltration (unitless). See table S24. 50
- 305  $f_{sn}$  fraction of the ground covered by snow (unitless). See tables S7, S8, S10, S11, S12, S25. 33, 34, 36–38, 51
- $f_{so,bare}$  fraction of the bare soil in a grid cell (unitless). See tables S1, S24. 27, 50
- $f_{so,bare,sat}$  fraction of the bare soil in a grid cell that is saturated (unitless). See table S24. 50
- $f_{so,dep}$  soil depletion fraction (unitless). See table S23. 49
- $f_{so,tex}$  soil-texture-related factor (unitless). See table S30. 56
- 310  $f_{su,gr}$  fractional area of surface ground (unitless). See table S24. 50

- $f_{sub}$  fraction of the surface water bodies (lakes, wetlands, reservoirs) (unitless). See tables S32, S43. 58, 69
- $f_{S_{so,max}}$  fraction of the maximum soil moisture (unitless). See table S31. 43
- $f_{w,lf}$  coverage of the water on leaf (unitless). See table S7. 33
- $f_{we}$  fraction coverage of wetland in a grid cell (unitless). See tables S20, S25, S27, S39, S40, S41. 46, 51, 53, 56, 65–67
- 315  $F$  mass gain due to frost ( $L^3 L^{-2} T^{-1}$ ). See table S8, S13. 34, 39
- $F_{so}$  frozen soil ( $\Theta$ ). See table S13. 39
- $g_{ca}$  canopy conductance ( $M L T^{-3} \Theta^{-1}$ ). See table S23. 49
- $g_{ca}^{air}$  water vapor conductance from the canopy air to the atmosphere ( $M L T^{-3} \Theta^{-1}$ ). See table S23. 49
- $g_{ca}^{H_s}$  vegetation sensible heat conductance ( $M L T^{-3} \Theta^{-1}$ ). See table S23. 49
- 320  $g_{gr}^{ca}$  water vapor conductance from ground to canopy air ( $M L T^{-3} \Theta^{-1}$ ). See table S23. 49
- $g_{so}$  soil conductance ( $M L T^{-3} \Theta^{-1}$ ). See table S24. 50
- $g_{st}^w$  water vapor leaf level stomatal conductance ( $M L T^{-3} \Theta^{-1}$ ). See tables S7, S23. 33, 49
- $g_{st,pot}$  potential leaf level stomatal conductance, non-water stressed ( $M L T^{-3} \Theta^{-1}$ ). See table S23. 49
- $G$  grid cell (1). See table S49. 75
- 325  $GAV$  gross added value per country (money  $T^{-1}$ ). See tables S69, S70, S72, S73. 95, 96, 98, 99
- $h_{of}$  overflow height (L). See tables S34, S37. 60, 63
- $h_w$  water height (L). See tables S34, S37. 60, 63
- $h_{w,we}$  wetland water level (L). See table S42. 68
- $H$  heat ( $M L^2 T^{-2}$ ). See table S12. 38
- 330  $H_{atm}$  heat flux from the overlaying atmosphere ( $M L^2 T^{-3} L^{-2}$ ). See table S13. 39
- $H_i$  excess or deficit of energy needed to change the soil layer temperature to freezing temperature ( $M T^{-2}$ ). See table S12. 38
- $H_l$  latent heat ( $M T^{-3}$ ). See tables S2, S7, S8, S10, S12. 28, 33, 34, 36, 38
- $H_{l,E}$  latent heat of evaporation ( $M T^{-3}$ ). See tables S7, S8, S9, S11, S23, S24. 28, 33, 34, 37, 49, 50
- $H_{l,E_{sn}}$  latent heat of sublimation ( $M T^{-3}$ ). See tables S7, S11. 33, 37
- 335  $H_M$  latent heat of melt ( $M T^{-3}$ ). See tables S8, S12. 34, 38
- $H_{M,ice}$  latent heat of ice ( $M T^{-3}$ ). See table S12. 38
- $H_{se}$  sensible heat flux ( $M T^{-3}$ ). See tables S10, S12. 36, 38
- $H_{sn}$  snow heat content ( $M T^{-3}$ ). See table S12. 38
- $H_{sn,i}$  snow heat content of layer  $i$  ( $M T^{-3}$ ). See table S12. 38
- 340  $H_{so}$  soil heat flux density ( $M T^{-3}$ ). See table S2. 28

- $H_{soTL}$  reciprocal areal heat capacity of the top soil layer ( $M T^{-3}$ ). See table S12. 38
- $H_{so,i}$  specific heat capacity of layer  $i$  ( $M L^2 T^{-2}$ ). See table S13. 39
- $H_{tot}$  total surface heat capacity ( $M L^2 T^{-2}$ ). See table S12. 38
- $i$  number of element or layer or space index (unitless). See tables S8, S12, S19. 34, 38, 45
- 345  $i_{GS}$  growing-season index (unitless). See table S7. 33
- $I_0$  initial intercepted canopy snow load (unitless). See table S9. 35
- $I_{cap}$  interception capacity (L). See table S3. 30
- $j$  weighting parameter that varies between 0 and 1. See table S52. 78
- $J_{ele,A,ints,i}$  water abstraction intensity of powerplant  $i$ . See table S75. 101
- 350  $J_{ele,cons,ints,i}$  water consumption intensity of powerplant  $i$ . See table S76. 102
- $J_{ele,cool,i}$  cooling system of powerplant  $i$ . See tables S75, S76. 101, 102
- $J_{ele,pt,i}$  plant type of powerplant  $i$ . See tables S75, S76. 101, 102
- $J_{ele,prod,i}$  thermal electricity production of powerplant  $i$  ( $MWh T^{-1}$ ). See tables S75, S76. 101, 102
- $k$  soil hydraulic conductivity ( $L T^{-1}$ ). See tables S13, S14, S21, S25, S27, S28. 39, 40, 47, 51, 53, 54
- 355  $k_{3so}$  hydraulic conductivity from the third soil layer to the deeper soil ( $L T^{-1}$ ). See tables S27, S28, S30. 53, 54, 56
- $k_{aq}$  hydraulic conductivity of the layer containing the water table (unitless). See table S30. 56
- $k_{bot}$  hydraulic conductivity of the bottom soil with free gravitational drainage ( $L T^{-1}$ ). See table S31. 56, 57
- $k_j$  hydraulic conductivity at the interface  $j$  (unitless). See table S25. 51
- $k_b$  recession coefficient of the saturated/groundwater storage, producing baseflow /groundwater runoff ( $T^{-1}$ ). See table S31.  
360 57
- $k_0$  recession coefficient of the unsaturated zone storage, upper outlet for fast interflow ( $T^{-1}$ ). See table S26. 52
- $k_1$  recession coefficient of the unsaturated zone reservoir, lower outlet for slow interflow ( $T^{-1}$ ). See table S26. 52
- $k_{uz}$  recession coefficient of the unsaturated zone reservoir to the saturated/groundwater reservoir (groundwater recharge / percolation ) ( $T^{-1}$ ). See table S30. 56
- 365  $k_{sat}$  effective saturated hydraulic conductivity (unitless). See tables S13, S25, S28. 39, 51, 54
- $k_{sat}^{gw}$  saturated hydraulic conductivity for groundwater (unitless). See table S31. 57
- $k_{th}$  thermal conductivity (unitless). See table S13. 39
- $K_f$  generatio ratio for interflow (unitless). See table S26. 52
- $K_{ff}$  generatio ratio for overflow of the uppermost layer, i.e. the Horton runoff (unitless). See table S22. 48
- 370  $l_G$  distance between centers of neighboring grid cells (L). See table S46. 72
- $l_{G,ri}$  distance between centers of neighboring grid cells, in river flow direction (L). See table S42. 68

- $l_{r,i}$  length of river sections (L). See tables S45, S46. 25, 71, 72
- $l_{r,i,hom}$  length of homogeneous rivers segments (L). See table S46. 72
- $LAI$  leaf area index ( $L L^{-1}$ ). See tables S4, S5, S6, S7, S9, S49. 30–33, 35, 74–77
- 375  $LAI_{max}$  maximum leaf area index ( $L L^{-1}$ ). See table S7. 33
- $LAI_{min}$  minimum leaf area index ( $L L^{-1}$ ). See table S7. 33
- $LAI_{month}$  leaf area index of monthly vegetation (unitless). See table S7. 33
- $LC$  land cover (unitless). See table S19. 45
- $M$  snowmelt, water that changes from solid to liquid ( $L^3 L^{-2} T^{-1}$ ). See tables S8, S11, S12, S14, S20, S21, S25, S39. 34, 37,  
380 38, 40, 46, 47, 51, 65
- $M_{ca}$  snowmelt on canopy ( $L^3 L^{-2} T^{-1}$ ). See table S9. 35
- $M_i$  snowmelt of layer  $i$  ( $L^3 L^{-2} T^{-1}$ ). See table S12. 38
- $M_{in}$  flow of liquid water into layer  $i$  from the layer above ( $L^3 L^{-2} T^{-1}$ ). See table S8. 34
- $M_{out}$  flow of liquid water out of layer  $i$  to the layer below ( $L^3 L^{-2} T^{-1}$ ). See table S8. 34
- 385  $M_{pot}$  potential snowmelt, amount of water that could change from solid to liquid independent of snow storage state  
( $L^3 L^{-2} T^{-1}$ ). See tables S8, S12. 34, 38
- $M_{SG_i}$  snowmelt in a subgrid cell Müller Schmied et al. [34] ( $L^3 L^{-2} T^{-1}$ ). See table S8. 34
- $M_t$  snowmelt at the time  $t$  ( $L^3 L^{-2} T^{-1}$ ). See table S12. 38
- $M_{underca}$  snowmelt under canopy ( $L^3 L^{-2} T^{-1}$ ). See table S10. 36
- 390  $n$  linear reservoir cascade index (unitless). See table S46. 72
- $NR$  net radiation flux ( $M L^{-2} T^{-3}$ ). See tables S2, S10, S12. 28, 36, 38
- $NR_n$  net radiation at crop surface ( $M J L^{-2} T^{-1}$ ). See table S2. 28
- $P_{conv}$  relative amount of convective precipitation ( $L^3 L^{-2} T^{-1}$ ). See table S21. 47
- $P_{dr}$  drip, dripping of water at the edge of the canopy ( $L^3 L^{-2} T^{-1}$ ). See tables S5, S9. 31, 35
- 395  $P_{dr,l}$  dripping of rain at the edge of the canopy ( $L^3 L^{-2} T^{-1}$ ). See table S5. 31
- $P_{dr,s}$  dripping of snow at the edge of the canopy ( $L^3 L^{-2} T^{-1}$ ). See tables S5, S9. 31, 35
- $P_{eff}$  effective precipitation reaching the soil surface ( $L^3 L^{-2} T^{-1}$ ). See table S57. 83
- $P_{gr}$  total precipitation falls directly to the ground (snow or soil surface) ( $L^3 L^{-2} T^{-1}$ ). See table S6. 32
- $P_{gr,l}$  rainfall falls directly to the ground ( $L^3 L^{-2} T^{-1}$ ). See table S6. 32
- 400  $P_{gr,l,calm}$  rainfall falling to the ground in calm areas ( $L^3 L^{-2} T^{-1}$ ). See table S4. 30
- $P_{gr,l,stormy}$  rainfall falling to the ground in stormy areas ( $L^3 L^{-2} T^{-1}$ ). See table S4. 30
- $P_{gr,s}$  snowfall falls directly to the ground ( $L^3 L^{-2} T^{-1}$ ). See tables S6, S10. 32, 36

- $P_{gr,s,calm}$  snowfall falling to the ground in calm areas ( $L^3 L^{-2} T^{-1}$ ). See table S4. 30
- $P_{gr,s,stormy}$  snowfall falling to the ground in stormy areas ( $L^3 L^{-2} T^{-1}$ ). See table S4. 30
- 405  $P_{int}$  precipitation intercepted by canopy ( $L^3 L^{-2} T^{-1}$ ). See tables S4, S7, S3. 29–31, 33
- $P_{int,l}$  interception of rainfall by canopy ( $L^3 L^{-2} T^{-1}$ ). See tables S3, S4, S5, S10. 29–31, 36
- $P_{int,l,calm}$  interception of rainfall by canopy in calm areas ( $L^3 L^{-2} T^{-1}$ ). See table S4. 30
- $P_{int,l,stormy}$  interception of rainfall by canopy in stormy areas ( $L^3 L^{-2} T^{-1}$ ). See table S4. 30
- $P_{int,max}$  calibration parameter of the canopy storage (L). See table S49. 76
- 410  $P_{int,s}$  interception of snowfall by canopy ( $L^3 L^{-2} T^{-1}$ ). See tables S3, S4, S5, S9. 29–31, 35
- $P_{int,s,calm}$  interception of snowfall by canopy in calm areas ( $L^3 L^{-2} T^{-1}$ ). See table S4. 30
- $P_{int,s,stormy}$  interception of snowfall by canopy in stormy areas ( $L^3 L^{-2} T^{-1}$ ). See table S4. 30
- $P_{ra}$  rainfall ( $L^3 L^{-2} T^{-1}$ ). See tables S4, S5, S6, S8, S9, S12, S20, S25, S39. 30–32, 34, 38, 46, 51, 65
- $P_{mean,G}$  grid cell average precipitation ( $L^3 L^{-2} T^{-1}$ ). See tables S5, S6. 31, 32
- 415  $P_{sn}$  snowfall ( $L^3 L^{-2} T^{-1}$ ). See tables S4, S5, S6, S9, S12. 30–32, 34, 35
- $P_{s,ca}$  snowfall that is affected by the canopy interception and dripping ( $L^3 L^{-2} T^{-1}$ ). See table S8. 34
- $P_{s,SG_i}$  snowfall in a subgrid (SG) cell Müller Schmied et al. [34] ( $L^3 L^{-2} T^{-1}$ ). See table S8. 34
- $P_{th}$  throughfall, total precipitation falls to the ground through canopy spaces ( $L^3 L^{-2} T^{-1}$ ). See tables S3, S5, S8, S9, S12, S14, S20, S21, S22, S25, S30. 29, 31, 34, 35, 38, 40, 46–48, 51, 56
- 420  $P_{th,l}$  rainfall falls to the ground through canopy spaces ( $L^3 L^{-2} T^{-1}$ ). See tables S3, S5. 29, 31
- $P_{th,s}$  snowfall falls to the ground through canopy spaces ( $L^3 L^{-2} T^{-1}$ ). See tables S3, S5. 29, 31
- $P_{tot}$  total precipitation which includes rainfall and snowfall ( $L^3 L^{-2} T^{-1}$ ). See tables S3, S4, S5, S7, S8, S9, S10, S20, S21, S25, S32, S33, S35, S38, S39, S47. 29–31, 33–36, 40, 46, 47, 51, 58, 59, 61, 64, 65, 73
- 425  $PAR$  photosynthetically active radiation. It is assumed to be 50% of shortwave incoming solar radiation ( $M L^2 T^{-3}$ ). See table S2. 28
- $PET$  total amount of water from transpiration, evaporation, interception losses, and sublimation that would occur if a sufficient water source were available ( $L^3 L^{-2} T^{-1}$ ). See tables S2, S7, S11, S23, S24, S33, S38, S41, S47, S52, S57. 28, 33, 37, 49, 50, 59, 64, 67, 73, 78, 83
- 430  $PET'$  overall PET flux reduced by canopy evaporation and evaporation from open-surface-bodies ( $L^3 L^{-2} T^{-1}$ ). See table S24. 50
- $PET_{ows}$  total amount of water from transpiration, evaporation from the impervious areas, defined here as open water storage ( $L^3 L^{-2} T^{-1}$ ). See tables S20, S24. 46, 50
- $PFT$  plant functional type (unitless). See tables S48, S49. 74, 75
- $POP$  population within the gridcell. See tables S59, S62. 85, 88
- 435  $POP_{liv,t}$  livestock type specific animal population within the gridcell. See table S68. 94

- $POP_u$  urban population within the gridcell. See tables S69, S70, S71, S72, S73, S74. 95–100
- $POP_u^c$  urban population of a country. See tables S69, S70, S71, S72, S73, S74. 95–100
- $q$  specific humidity of near-surface air ( $M M^{-1}$ ). See tables S2, S7, S11, S23, S24. 28, 33, 37, 49, 50
- $q_{gr}$  specific humidity at ground surface ( $M M^{-1}$ ). See tables S2, S23. 28, 49
- 440  $q_{sat}^{ca}$  saturated specific humidity at canopy temperature ( $M M^{-1}$ ). See tables S7, S11, S23, S24. 33, 37, 49, 50
- $q_{sat}^{gr}$  saturated specific humidity at ground surface ( $M M^{-1}$ ). See tables S2, S11, S24. 28, 37, 50
- $q_{sat}^{gr,sn}$  saturated specific humidity at ground surface with snow ( $M M^{-1}$ ). See table S11. 37
- $q_{sat}^{sn}$  saturated specific humidity at snow ( $M M^{-1}$ ). See table S7. 33
- $q_{so}$  relative humidity of the soil pore space ( $M M^{-1}$ ). See table S24. 50
- 445  $q_{su}$  relative humidity at the near-surface ( $M M^{-1}$ ) dimensions. See table S11. 37
- $Q_{ef}$  environmental flow ( $L^3 T^{-1}$ ). See tables S35, S56, S62, S72, S75. 61
- $Q_i$  vertical water flux from soil layer above, including infiltration in the upper layer and percolation and capillary rise in all layers ( $L^3 T^{-1}$ ). See table S14. 40
- $Q_{i-1}$  vertical water flux to soil layer below, including infiltration in the upper layer and percolation and capillary rise in all layers ( $L^3 T^{-1}$ ). See table S14. 40
- 450  $Q_{in,so}$  soil moisture flux ( $L^3 T^{-1}$ ). See table S13. 39
- $Q_{in,surf}$  surface moisture flux remaining after surface runoff has been removed ( $L^3 T^{-1}$ ). See table S25. 51
- $Q_{iu}$  inflow upstream of a grid cell ( $L^3 T^{-1}$ ). See tables S32, S35, S43, S45, S46, S54, S55, S56, S57, S59, S60, S61, S62, S63, S65, S66, S67, S68, S69, S70, S71, S72, S73. 58, 61, 69, 71, 72, 80–83, 85–89, 91–99
- 455  $Q_{iu,la}$  mean total annual inflow in a lake ( $L^3 T^{-1}$ ). See tables S34, S43. 60, 69
- $Q_{iu,mean}$  mean annual inflow in a reservoir ( $L^3 T^{-1}$ ). See table S37. 63
- $Q_{iu,re}$  inflow reservoir ( $L^3 T^{-1}$ ). See tables S35, S37, S43. 61, 63, 69
- $Q_{iu,tot,re}$  mean total annual inflow in a reservoir ( $L^3 T^{-1}$ ). See table S37. 63
- $Q_{iu,we,up}$  inflow from the wetland of an upstream grid cell ( $L^3 T^{-1}$ ). See tables S39, S40, S45. 65, 66, 71
- 460  $Q_{la}$  outflow from a lake ( $L^3 T^{-1}$ ). See tables S32, S34, S43. 58, 60, 61
- $Q_{la,global}$  outflow from a global lake ( $L^3 T^{-1}$ ). See tables S32, S34, S39. 58, 60, 65
- $Q_{la,local}$  outflow from a local lake ( $L^3 T^{-1}$ ). See tables S32, S34, S39. 58, 60, 65
- $Q_{mean}$  outflow mean ( $L^3 T^{-1}$ ). See table S35. 61
- $Q_{od}$  outflow downstream of a grid cell ( $L^3$ ). See table S43. 69
- 465  $Q_{rv,up}$  outflow from rivulet storage of upstream grid cells ( $L^3 T^{-1}$ ). See tables S40, S45. 66, 71
- $Q_{pf}$  preferential flow ( $L^3 T^{-1}$ ). See tables S21, S29, S30. 47, 55, 56



- $Q_{re}$  outflow from a local reservoir that flows directly into the river channel of the cell ( $L^3 T^{-1}$ ). See tables S35, S37, S39, S43, S46. 61, 63, 65, 69, 72
- $Q_{re,de}^{irr}$  outflow from a irrigation reservoir driven by water demand in downstream cells ( $L^3 T^{-1}$ ). See table S37. 63
- 470  $Q_{re,global}$  outflow from a global reservoir ( $L^3 T^{-1}$ ). See table S37. 63
- $Q_{re,global}^{irr}$  outflow from a global reservoir designed for irrigation ( $L^3 T^{-1}$ ). See table S37. 63
- $Q_{re,global}^{non-irr}$  outflow from a global reservoir designed for other purposes than irrigation ( $L^3 T^{-1}$ ). See table S37. 63
- $Q_{re,global}^{purpose}$  outflow from a global reservoir for irrigation or others purposes ( $L^3 T^{-1}$ ). See table S37. 63
- $Q_{re,mean}$  long-term mean outflow from a reservoir ( $L^3 T^{-1}$ ). See table S37. 63
- 475  $Q_{re,min}$  minimum outflow from reservoir ( $L^3 T^{-1}$ ). See table S37. 63
- $Q_{re,nd}$  non-damaging outflow from reservoir ( $L^3 T^{-1}$ ). See table S37. 63
- $Q_{re,norm}$  normal outflow from reservoir ( $L^3 T^{-1}$ ). See table S37. 63
- $Q_{re,local}$  outflow from a local reservoir ( $L^3 T^{-1}$ ). See tables S43, S37, S46. 61, 63, 72
- $Q_{ri}$  streamflow ( $L^3$ ). See tables S35, S43, S45, S46. 61, 69, 71, 72
- 480  $Q_{ri,in}$  streamflow inflow ( $L^3 T^{-1}$ ). See tables S32, S35, S46. 58, 61, 72
- $Q_{ri,n}$  outflow of river storage cascade  $n$  ( $L^3 T^{-1}$ ). See table S43. 69
- $Q_{ri,n-1}$  outflow of prior river storage cascade  $n - 1$  ( $L^3 T^{-1}$ ). See table S43. 69
- $Q_{ri,out}$  streamflow outflow ( $L^3 T^{-1}$ ). See tables S32, S35, S46. 58, 61, 72
- $Q_{ri,up}$  streamflow from the upstream grid cell ( $L^3 T^{-1}$ ). See tables S40, S45. 66, 71
- 485  $Q_{we}$  outflow from wetland ( $L^3 T^{-1}$ ). See tables S39, S42. 65, 68
- $Q_{we,global}$  outflow from a global wetland ( $L^3 T^{-1}$ ). See tables S39, S42, S43. 65, 68, 69
- $Q_{we,local}$  outflow from a local wetland ( $L^3 T^{-1}$ ). See tables S32, S35, S39, S42. 58, 61, 65, 68
- $r_b$  bulk canopy resistance ( $T L^{-1}$ ) . See tables S7, S11, S23. 33, 37, 49
- 490  $r_{ca}$  vegetation or canopy aerodynamic resistance ( $T L^{-1}$ ; for Mac-PDM.20  $cms^{-1}$ ). See tables S2, S7, S11, S23. 28, 33, 37, 49
- $r_{ca,dry}$  aerodynamic resistance of the dry leaves ( $T L^{-1}$ ). See table S23. 49
- $r_{floodplain}$  floodplain resistance (unitless). See tables S11, S24. 37, 50
- $r_o$  architectural resistance ( $T L^{-1}$ ). See tables S7, S23. 33, 49
- $r_{sn}$  snow resistance (unitless). See tables S7, S11, S23, S24. 33, 37, 49, 50
- 495  $r_{so}$  bare soil resistance ( $T L^{-1}$ ). See tables S11, S24. 37, 50
- $r_{tot}$  total resistance to water vapor transfer from the canopy to the canopy air ( $T L^{-1}$ ) . See table S7. 33

- $r_w$  aerodynamic resistance ( $T L^{-1}$ ; for Mac-PDM.20  $\text{cms}^{-1}$ ). See tables S2, S7, S23. 28, 33, 49
- $r_{wca}$  aerodynamic resistance under canopy air space ( $T L^{-1}$ ). See tables S11, S24. 50
- $R_0$  runoff 0 ( $L^3 L^{-2} T^{-1}$ ). See table S20. 46
- 500  $R_1$  runoff 1 ( $L^3 L^{-2} T^{-1}$ ). See table S20. 46
- $R_2$  runoff 2 ( $L^3 L^{-2} T^{-1}$ ). See table S20. 46
- $R_{bu}$  immediate runoff in urban areas ( $L^3 L^{-2} T^{-1}$ ). See table S18. 44
- $R_{cr}$  capillary rise ( $L^3 L^{-2} T^{-1}$ ). See tables S14, S26, S28, S29, S30. 40, 52, 54–56
- 505  $R_{cr,max}$  maximum capillary rise in a cell fraction, depending on height of ground water table and relative elevation of grid ( $L^3 L^{-2} T^{-1}$ ). See table S28. 54
- $R_G$  total runoff of a grid (G) cell, a lag process between runoff generation and river routing for each grid cell ( $L^3 L^{-2} T^{-1}$ ). See table S19, S44. 45, 70
- $R_{gl,we,la}$  liquid runoff from glaciers, wetlands, and lakes / is this a part of saturation excess flow? ( $M L^{-2} T^{-1}$ ). See table S20. 46
- 510  $R_{gw}$  groundwater runoff, outflow of the groundwater storage ( $L^3 L^{-2} T^{-1}$ ). See tables S14, S29, S30, S31, S32, S43, S54, S55, S56, S57, S59, S60, S61, S62, S63, S65, S66, S67, S68, S69, S70, S71, S72, S73. 40, 43, 44, 55–58, 69, 80–83, 85–89, 91–99
- $R_{gw}^{ri}$  groundwater runoff which recharges rivers ( $L^3 L^{-2} T^{-1}$ ). See table S43. 69
- $R_{gw,max}$  Maximum drainage when the water table depth is at the surface ( $L^3 L^{-2} T^{-1}$ ). See table S31. 57
- 515  $R_{gw,rout}$  groundwater routing parameter for Mac-PDM.20 (unitless). See table S31. 57
- $R_{gw,up}$  groundwater runoff from the upstream grid cell ( $L^3 L^{-2} T^{-1}$ ). See tables S40, S45. 66, 71
- $R_{gwr}$  groundwater recharge ( $L^3 L^{-2} T^{-1}$ ). See tables S14, S20, S29, S30, S54. 40, 43, 46, 55, 56
- $R_{gwr}^{swb}$  groundwater recharge below surface water bodies ( $L^3 L^{-2} T^{-1}$ ). See tables S32, S35, S39. 58, 61, 65
- $R_{gwr,i}$  groundwater recharge in layer  $i$  ( $L^3 L^{-2} T^{-1}$ ). See table S14. 40
- 520  $R_{gwr,i-1}$  groundwater recharge in layer  $i - 1$  ( $L^3 L^{-2} T^{-1}$ ). See table S14. 40
- $R_{gwr,max}$  maximum groundwater recharge ( $L^3 L^{-2} T^{-1}$ ). See tables S30, S39. 56, 65
- $R_{gwr,min}$  minimum groundwater recharge ( $L^3 L^{-2} T^{-1}$ ). See table S27. 56
- $R_G^n$  runoff concentration in a grid (G) cell, of a time step  $n$ , represents the lag process between runoff generation and river routing, for each grid cell. The runoff generated for each grid cell is routed to the corner of each cell and a concentration time is determined before it enters into the river storage ( $L^3 L^{-2} T^{-1}$ ). See table S19. 45
- 525  $R_G^1$  runoff concentration in a grid cell of the first time step ( $L^3 L^{-2} T^{-1}$ ). See table S44. 70
- $R_{ho}$  hortonian overland flow or infiltration excess overland flow occurs when precipitation exceeds the infiltration capacity of the soil. The water excess runs off over the ground surface because soil cannot absorb it ( $L^3 L^{-2} T^{-1}$ ). See tables S20, S21, S25. 46, 47, 51

- 530  $R_{ho,calm}$  hortonian overland flow in calm areas ( $L^3 L^{-2} T^{-1}$ ). See table S21. 47
- $R_{ho,stormy}$  hortonian overland flow in stormy areas ( $L^3 L^{-2} T^{-1}$ ). See table S21. 47
- $R_{if}$  interflow or subsurface flow, outflow of the soil storage that discharges into river, lake, and wetland storages. It doesn't reach the groundwater storage ( $L^3 L^{-2} T^{-1}$ ). See tables S14, S17, S20, S26, S43. 40, 43, 46, 52, 69
- 535  $R_{if,fast}$  fast interflow from the unsaturated storage ( $L^3 L^{-2} T^{-1}$ ). This does not flow from the soil storage. See tables S17, S18, S26. 43, 44, 52
- $R_{if,max}$  maximum subsurface flow ( $L^3 L^{-2} T^{-1}$ ). See table S31. 43
- $R_{if,slow}$  slow interflow from the unsaturated storage ( $L^3 L^{-2} T^{-1}$ ). This does not flow from the soil storage. See tables S17, S18, S26. 43, 44, 52
- $R_{in}$  infiltration ( $L^3 L^{-2} T^{-1}$ ). See tables S8, S10, S14, S20, S18, S21, S25, S27, S57. 34, 36, 40, 44, 46, 47, 51, 53, 83
- 540  $R_{in,0}$  corresponding point infiltration capacity ( $L^3 L^{-2} T^{-1}$ ). See tables S20, S24. 46, 50
- $R_{in,BL}$  infiltration from the base layer (BL) ( $L^3 L^{-2} T^{-1}$ ). See table S30. 56
- $R_{in,cum}$  cumulative infiltration ( $L^3 L^{-2} T^{-1}$ ). See table S25. 51
- $R_{in,i}$  infiltration in layer  $i$  ( $L^3 L^{-2} T^{-1}$ ). See tables S8, S14, S20, S25. 34, 40, 46, 51
- $R_{in,i-1}$  infiltration in layer  $i - 1$  ( $L^3 L^{-2} T^{-1}$ ). See tables S8, S25. 34, 51
- 545  $R_{in,L}$  infiltration from layer (L) ( $L^3 L^{-2} T^{-1}$ ). See table S26. 52
- $R_{in,max}$  infiltration capacity or the maximum rate of infiltration ( $L^3 L^{-2} T^{-1}$ ). See tables S20, S21, S24, S25. 46, 47, 50, 51
- $R_{in,over-so}$  infiltration over soil covered cell fraction ( $L^3 L^{-2} T^{-1}$ ). See table S25. 51
- $R_{in,pot}$  potential infiltration ( $L^3 L^{-2} T^{-1}$ ). See table S25. 51
- $R_{in,r}$  re-infiltration ( $L^3 L^{-2} T^{-1}$ ). See table S14. 40
- 550  $R_{in,sat}$  infiltration at saturation level ( $L^3 L^{-2} T^{-1}$ ). See table S26. 52
- $R_{in,TL}$  infiltration from the top soil layer (TL) ( $L^3 L^{-2} T^{-1}$ ). See table S20. 46
- $R_{of}$  runoff induced by the over saturation at the surface / is this similar to saturation excess flow ( $L^3 L^{-2} T^{-1}$ ). See table S20, S56. 46, 82
- 555  $R_{pe}$  percolation or drainage, infiltrated water into the soil that runs off toward the groundwater storage ( $L^3 L^{-2} T^{-1}$ ). See tables S14, S18, S25, S26, S27, S29, S30, S39. 40, 51–53, 55, 56, 65
- $R_{pe,h2osfc}$  bottom drainage from the surface water store ( $L^3 L^{-2} T^{-1}$ ). See table S25. 51
- $R_s$  water that leaves the surface layer (topsoil layer) e.g. as overland flow / fast runoff in ISIMIP2b ( $L^3 L^{-2} T^{-1}$ ). See table S16. 41, 42
- 560  $R_{sat}$  saturation excess overland flow occurs when the soil is saturated or filled with water, and any additional precipitation or irrigation causes runoff. ( $L^3 L^{-2} T^{-1}$ ). See tables S20, S18, S22, S25. 44, 46, 48, 51
- $R_{sb}$  sum of water that flows out from subsurface layer(s) including the groundwater layer (if present). Equals groundwater runoff in case of a groundwater layer below only one soil layer in ISIMIP2b ( $L^3 L^{-2} T^{-1}$ ). See table S17. 41, 43

- $R_{sn}$  snow runoff, melted water that runs off on the ground surface covered with snow ( $L^3 L^{-2} T^{-1}$ ). See table S12. 38
- $R_{snwcp,ice}$  ice runoff from snow-capped surfaces / is this a part of saturation excess flow ( $M L^{-2} T^{-1}$ ). See table S20. 46
- 565  $R_{sof,i}$  infiltration from soil layer  $i$  ( $L^3 L^{-2} T^{-1}$ ). See table S14. 40
- $R_{sof,i-1}$  infiltration from soil layer  $i - 1$  ( $L^3 L^{-2} T^{-1}$ ). See table S8. 40
- $R_{su}$  surface runoff or overland flow, water excess that runs off over the ground surface as Hortonian overland flow and (rainfall rate dependent) / or Saturation excess overland flow (soil saturated or filled with water) ( $L^3 L^{-2} T^{-1}$ ). See tables S14, S16, S18, S20, S22, S25, S32, S43, S44, S46. 40, 42, 44, 46, 48, 51, 58, 69, 70, 72, 85
- 570  $R_{su,ice}$  ice water runoff at the land model resolution / is this the water that runs off over the ground surface covered with ice / part of saturation excess flow ( $M L^{-2} T^{-1}$ ). See table S20. 46
- $R_{su,l}$  liquid water runoff at the land model resolution / is this the saturation excess flow ( $M L^{-2} T^{-1}$ ). See tables S20, S43. 46, 69
- 575  $R_{su_{LC,R}}$  runoff generated for each cell that is routed towards the corner of each cell, with a concentration time, depending on land cover class, slope, and runoff component (surface, interflow, or baseflow). Runoff generated for a grid cell is then calculated using a triangular-weighting-function ( $L^3 L^{-2} T^{-1}$ ). See tables S19, S44. 45, 70
- $R_{tot}$  total runoff from land includes surface runoff, subsurface runoff, and groundwater recharge ( $L^3 L^{-2} T^{-1}$ ). See tables S14, S20, S18, S30, S35, S37, S43, S46. 40, 44, 46, 56, 61, 63, 69, 72
- $R_{tot,ISIMIP2b}$  total runoff ISIMIP2b, it includes surface runoff and subsurface runoff ( $L^3 L^{-2} T^{-1}$ ). See table S15. 41
- 580  $s_{ri}$  river bed slope ( $L L^{-1}$ ). See table S46. 72
- $s_{vp,sat}$  slope of saturated vapour pressure ( $M L^{-1} T^{-2} \Theta^{-1}$ ). See table S2. 28
- $s_{we,mean}$  mean slope within wetland ( $L$ ). See table S42. 68
- $S_{buf}$  storage buffer ( $L^3 L^{-2} T^{-1}$ ). See table S57. 83
- 585  $S_{ca}$  canopy compartment that retains water from precipitation and loses water through throughfall, stemflow and interception loss (evaporation) ( $L^3 L^{-2}$ ). See tables S3, S4, S5, S7, S20, S23, S26. 29–31, 33, 46, 49, 52
- $S_{ca,dif}$  the difference between the canopy storage capacity and the water stored on the canopy ( $L^3 L^{-2}$ ). See table S5. 31
- $S_{ca,int}$  canopy compartment that retains water after precipitation is intercepted by canopy ( $L^3 L^{-2}$ ). See table S5. 31
- $S_{ca,l}$  canopy compartment that retains rainfall and loses water through throughfall, stemflow and evaporation ( $L^3 L^{-2}$ ). See tables S3, S4, S5. 29–31
- 590  $S_{ca,max}$  maximum value of canopy storage compartment ( $L^3 L^{-2}$ ). See tables S4, S5, S7, S20, S23, S49, S51. 30, 31, 33, 46, 49, 75, 77
- $S_{ca,min}$  minimum value of canopy storage compartment ( $L^3 L^{-2}$ ). See table S49. 75
- $S_{ca,p}$  interception storage parameter (unitless). See table S49. 75
- 595  $S_{ca,s}$  canopy compartment that retains snowfall and loses water through throughfall, stemflow and sublimation ( $L^3 L^{-2}$ ). See tables S3, S4, S5. 29–31
- $S_{cons}$  conservative storage limit (unitless). See table S37. 63

- $S_f$  storage of the fast response reservoir ( $L^3 T^{-1}$ ). See table S22, S26. 48, 52
- $S_{flood}$  flood storage limit (unitless). See table S37. 63
- $S_{ftr}$  specified threshold of the fast response reservoir ( $L^3 T^{-1}$ ). See table S22. 48
- 600  $S_{gw}$  groundwater storage ( $L^3 L^{-2}$ ). See tables S29, S31, S53. 55, 57, 79
- $S_{gw,nrw}$  groundwater storage non-renewable ( $L^3 L^{-2}$ ). See table S29. 55
- $S_{gw,rw}$  groundwater storage renewable ( $L^3 L^{-2}$ ). See tables S29, S31, S53, S59, S69. 55, 57, 79, 85, 95
- $S_i$  storage of  $i$  element = overland, baseflow, river or wetland (unitless). See table S52. 78
- $S_{ice}$  ice storage ( $L^3 L^{-2}$ ). See table S12. 38
- 605  $S_{ice,sn,i+1}$  solid water stored in the upper snow layer ( $i + 1$ ),  $i$  is the snow layer index ( $L^3 L^{-2}$ ). See table S11. 37
- $S_{la}$  lake storage ( $L^3 L^{-2}$ ). See tables S32, S33, S34, S47. 58–60, 73
- $S_{la,global}$  global lake storage ( $L^3 L^{-2}$ ). See tables S32, S34. 58, 60
- $S_{la,global,max}$  maximum global lake storage ( $L^3 L^{-2}$ ). See tables S32, S49. 58, 77
- $S_{la,local}$  local lake storage ( $L^3 L^{-2}$ ). See tables S32, S34. 58, 60
- 610  $S_{la,local,max}$  maximum local lake storage ( $L^3 L^{-2}$ ). See tables S32, S34, S49. 58, 60, 77
- $S_{la,max}$  maximum amount of water in the lake storage ( $L^3 L^{-2}$ ). See table S34. 60
- $S_{l,sn,i+1}$  liquid water stored in the upper snow layer ( $i + 1$ ),  $i$  is snow layer index ( $L^3 L^{-2}$ ). See table S11. 37
- $S_{norm}$  normal storage limit (unitless). See table S37. 63
- $S_{paddy}$  storage of flooded paddy rice ( $L^3 L^{-2}$ ). See table S22. 82
- 615  $S_{pon}$  ponding storage (sealed areas) ( $L^3 L^{-2}$ ). See table S20, S24. 46, 50
- $S_{pon,max}$  maximum ponding zone storage ( $L$ ). See tables S20, S24. 46, 50
- $S_{re}$  reservoir storage ( $L^3 L^{-2}$ ). See tables S35, S37, S38. 61, 63, 64
- $S_{re,act}$  actual reservoir storage ( $L^3$ ). See table S35. 61
- $S_{re,C}$  reservoir storage capacity ( $L^3$ ). See tables S35, S37, S49. 61, 63, 77
- 620  $S_{re,global}$  global reservoir storage ( $L^3 L^{-2}$ ). See tables S35, S43. 63, 69
- $S_{re,global}^{purpose}$  global reservoir storage for irrigation or others purposes ( $L^3 L^{-2}$ ). See table S37. 63
- $S_{re,local}$  local reservoir storage ( $L^3 L^{-2}$ ). See table S37. 63
- $S_{re,max}$  maximum water amount of reservoir storage ( $L^3 L^{-2}$ ). See tables S35, S37. 61, 63
- $S_{re,tot}$  total reservoir storage capacity ( $L^3$ ). See table S37. 63
- 625  $S_{ri}$  river storage ( $L^3 L^{-2}$ ). See tables S43, S45, S46. 69, 71, 72
- $S_{ri,n}$  state of the  $n^{th}$  cascade in the river storage ( $L^3 L^{-2}$ ). See tables S43, S46, S56. 69, 72, 82

- $S_{rv}$  rivulet storage that collects water of small creeks, streams. ( $L^3 L^{-2}$ ). See tables S19, S44. 45, 70
- $S_{rz}$  root zone water storage ( $L^3 L^{-2}$ ). See tables S7, S18, S24. 33, 44, 50
- 630  $S_{rz,max}$  maximum root zone water storage or root zone storage capacity ( $L^3 L^{-2}$ ). See tables S7, S18, S24, S51. 33, 44, 50, 77
- $S_{sn}$  snow storage, compartment that accumulates snow below freezing temperature and loses snow by melting and sublimation ( $L^3 L^{-2}$ ). See tables S8, S11, S12. 34, 37, 38
- $S_{soc}$  compartment that accumulates snow on canopy below freezing temperature and loses snow by melting and sublimation ( $L^3 L^{-2}$ ). See tables S9, S10. 35, 36
- 635  $S_{sn,i}$  snow storage of layer  $i$  ( $L^3 L^{-2}$ ). See table S12. 38
- $S_{sn,i}$  number of snow layers  $i$  (unitless). See tables S8,S12. 34, 38
- $S_{sn,ice}$  frozen water content in snow storage ( $L^3 L^{-2}$ ). See table S8. 34
- $S_{sn,l}$  liquid water content in snow storage ( $L^3 L^{-2}$ ). See tables S8, S12. 34, 38
- 640  $S_{sn,SG_i}$  subcompartment that accumulates snow in subgrid cells below freezing temperature and loses snow by melting and sublimation Müller Schmied et al. [34] ( $L^3 L^{-2}$ ). See table S12. 38
- $S_{suc}$  compartment that accumulates snow under canopy below freezing temperature and loses snow by melting and sublimation ( $L^3 L^{-2}$ ). See table S10. 36
- $S_{so}$  soil water storage compartment ( $L^3 L^{-2}$ ). See tables S14, S20, S18, S22, S23, S24, S27, S30, S49, S57. 28, 40, 44, 46, 48–50, 56, 77, 83
- 645  $S_{so,3L}$  soil moisture or soil water content for the third layer (3L) ( $L^3$ ). See table S27. 43
- $S_{so,a,i}$  simulated actual soil moisture content of layer  $i$  ( $L^3 L^{-3}$ ). See tables S52, S56. 78
- $S_{so,crit}$  critical volumetric soil moisture concentration that corresponds to a critical water suction potential ( $L^3 L^{-2}$ ). See tables S23, S24, S57. 49, 50, 83
- $S_{so,cur}$  current soil water content or current soil moisture ( $L^3 L^{-2}$ ). See table S52. 78
- 650  $S_{so,F_i}$  frozen soil water or frozen soil moisture at layer index  $i$  ( $L^3 L^{-2}$ ). See tables S14, S29. 40, 55
- $S_{so,FC}$  soil water content at field capacity (FC) ( $L^3 L^{-2}$ ). See tables S2, S20, S23, S24, S25, S30, S57. 28, 46, 49–51, 53, 56, 78, 83
- $S_{so,FL}$  soil water content in first layer (FL) ( $L^3 L^{-2}$ ). See table S24. 50
- $S_{so,i}$  soil storage in layer  $i$  ( $L^3 L^{-2}$ ). See tables S14, S24, S25. 40, 50, 51
- 655  $S_{so,ini}$  initial soil water content or soil moisture ( $L^3 L^{-2}$ ). See table S25. 51
- $S_{so,l,i}$  liquid soil storage in layer  $i$  ( $L^3 L^{-2}$ ). See table S14. 40
- $S_{so,max}$  maximum soil storage ( $L^3 L^{-2}$ ). See tables S20, S23, S24, S30. 46, 49, 50, 56
- $S_{so,max,i}$  maximum soil moisture content of layer  $i$  ( $L^3 L^{-3}$ ) See table S25. 51, 76
- $S_{so,pot}$  potential soil water content or soil moisture ( $L^3 L^{-2}$ ). See table S25. 51

- 660  $S_{so,max,3L}$  maximum soil moisture or soil water content of the third soil layer (3L) (L). See tables S17, S30. 43, 56
- $S_{so,r,i}$  residual soil moisture content of layer  $i$  ( $L^3 L^{-3}$ ). See tables S24, S25. 50, 51
- $S_{so,ready}$  ready available soil water content ( $L^3 L^{-2}$ ). See table S57. 78, 83
- $S_{so,rel}$  relative soil water content or soil moisture ( $L^3 L^{-2}$ ). See tables S21, S23, S24, S25. 47, 49–51
- $S_{so,sat,FL}$  soil water content at saturation in first layer ( $L^3 L^{-2}$ ). See table S25. 51
- 665  $S_{so,SG}$  subgrid soil storage ( $L^3 L^{-2}$ ). See table S20. 46
- $S_{so,SG,min}$  minimum subgrid soil moisture storage ( $L^3 L^{-2}$ ). See table S20. 46
- $S_{so,SG,max}$  maximum subgrid soil moisture storage ( $L^3 L^{-2}$ ). See table S20. 46
- $S_{so,sat}$  soil water content at saturation (SAT) ( $L^3 L^{-2}$ ). See tables S21, S25, S26, S28, S30, S57. 47, 51–54, 56, 78
- $S_{so,sat,p}$  soil water content at saturation parameter (unitless). See tables S49, S50. 75, 76
- 670  $S_{so,t,i}$  target soil moisture content of layer  $i$  ( $L^3 L^{-3}$ ). See tables S52, S56. 78
- $S_{so,T2L}$  volumetric soil moisture content or soil storage for the top two layers (T2L) ( $L^3$ ). See tables S20, S57. 46, 83
- $S_{so,TL}$  total available water capacity for the top soil layer ( $L^3 L^{-1} L^{-2}$ ). See tables S18, S22, S49. 44, 48, 76
- $S_{so,tot}$  total soil water content or total soil moisture ( $L^3 L^{-2}$ ). See tables S20, S21, S23, S24, S25, S26, S28, S30. 46, 47, 49–52, 54, 56
- 675  $S_{so,uF}$  unfrozen soil water or unfrozen soil moisture ( $L^3 L^{-2}$ ). See table S14. 39
- $S_{so,uF_i}$  unfrozen soil water or unfrozen soil moisture at layer index  $i$  ( $L^3 L^{-2}$ ). See tables S14, S29. 40, 55
- $S_{so,uF_i,gw}$  unfrozen soil water or unfrozen soil moisture at the layer  $i$  that has groundwater table ( $L^3 L^{-2}$ ). See table S30. 56
- $S_{so,w,i}$  soil moisture limit above which the actual transpiration is equated with the PET at layer  $i$  ( $L^3 L^{-3}$ ). See table S24. 50
- $S_{so,WP}$  soil water content at wilting point (WP) ( $L^3 L^{-2}$ ). See tables S20, S21, S23, S25, S26, S30, S52, S57. 46, 47, 49, 51, 52, 56, 78, 83
- 680  $S_{so,F}$  frozen soil water or frozen soil moisture ( $L^3 L^{-2}$ ). See table S14. 39
- $S_{uz}$  unsaturated zone storage ( $L^3 L^{-2}$ ), with two possible outflows: fast interflow and slow interflow. See tables S26, S30. 52, 56
- $S_{uz,thr}$  threshold for the unsaturated zone storage (L) which triggers fast interflow. See table S26. 52
- 685  $S_{w,first}$  the water storage at the beginning of the year ( $L^3 L^{-2}$ ). See table S37. 63
- $S_{we}$  wetland storage, compartment filled by precipitation or inflow and emptied by evapo(transpi)ration, outflow and groundwater recharge ( $L^3 L^{-2}$ ). See tables S39, S42, S56. 65, 68, 82
- $S_{we,global}$  global wetland storage ( $L^3 L^{-2}$ ). See tables S39, S42. 65, 68
- $S_{we,global,max}$  maximum global wetland storage ( $L^3 L^{-2}$ ). See tables S39, S49. 65, 77
- 690  $S_{we,local}$  local wetland storage ( $L^3 L^{-2}$ ). See tables S39, S42. 65, 68

- $S_{we,local,max}$  maximum local wetland storage ( $L^3 L^{-2}$ ). See tables S39, S42, S49. 65, 68, 77
- $S_y$  specific yield depending on soil properties and water table location ( $M L^{-1}$ ). See table S29. 55
- $SAI$  exposed stem area index (unitless). See tables S4, S6. 30, 32
- $SR$  incoming solar radiation ( $M T^{-3}$ ). See table S2. 28
- 695  $SWE$  snow water equivalent ( $L^3 L^{-2} T^{-1}$ ). See tables S10, S13. 36, 39
- $t$  time (T). See tables S3, S7, S8, S9, S10, S11, S13, S14, S19, S25, S29, S31, S32, S34, S35, S39, S43, S44, S46. 29, 33–37, 39, 40, 45, 46, 51, 55, 57, 58, 60, 61, 65, 69, 70, 72
- $t_{ret}$  topographic index of the retention time (L). See tables S43, S45, S46. 69, 71, 72
- $t_{ri,fast}$  property of the fast reservoir ( $25 T L^{-1}$ ). See table S43. 69
- 700  $t_{ri,slow}$  property of the slow reservoir ( $3 T L^{-1}$ ). See table S43. 69
- $t_{ri,stream}$  property of the stream reservoir ( $0.24 T L^{-1}$ ). See tables S43, S45, S46. 69, 71, 72
- $t_{we}$  lag time for outflow computation of the wetland storage (T). See table S42. 68
- $t_{day}$  day of year (L). See table S12. 38
- $t_{year}$  number of days in the actual year (L). See tables S2, S12. 28, 38
- 705  $tri_x$  triangular function (unitless). See table S19. 45
- $T$  transpiration, water evaporated by plants through their stomata ( $L^3 L^{-2} T^{-1}$ ). See tables S1, S14, S23, S25, S52. 27, 40, 49, 51, 78
- $T_{act}$  actual transpiration, the initial water evaporated by plants through their stomata ( $L^3 L^{-2} T^{-1}$ ). See table S23. 49
- $T_{ca}^{sn,cov}$  transpiration of snow-covered canopy ( $L^3 L^{-2} T^{-1}$ ). See table S23. 49
- 710  $T_{ca}^{sn,free}$  transpiration of snow-free canopy ( $L^3 L^{-2} T^{-1}$ ). See table S23. 49
- $T_i$  water removed by transpiration in each layer  $i$  ( $L^3 L^{-2} T^{-1}$ ). See table S14. 40
- $T_{max}$  maximum transpiration ( $L^3 L^{-2} T^{-1}$ ). See table S23. 49
- $T_{pot}$  potential transpiration, water evaporated by plants through their stomata, if a sufficient water source is available ( $L^3 L^{-2} T^{-1}$ ). See table S23. 49
- 715  $U_{ca,sn}$  canopy snow unloading from wind speed and above-freezing temperatures ( $L^3 L^{-2} T^{-1}$ ). See table S9. 35
- $v$  flow velocity ( $L T^{-1}$ ). See tables S45, S46. 71, 72
- $v_{mean}$  mean flow velocity ( $L T^{-1}$ ). See table S46. 72
- $W$  wind speed ( $L T^{-1}$ ). See tables S2, S7, S11, S23, S24. 28, 33, 37, 49, 50
- $W_2$  wind speed at 2m height ( $L T^{-1}$ ). See tables S2, S23, S24. 28, 49, 50
- 720  $w_{sfc}$  balance of surface water (M). See table S25. 51
- $X$  irrigation efficiency (unitless). See tables S54, S55, S57. 80, 81, 83



- $X_{conv}$  conveyance efficiency (unitless). See table S57. 83
- $X_{dom}$  water use efficiency of the domestic sector (unitless). See tables S60, S63. 86, 89
- $X_{et}$  evaporation efficiency (unitless). See table S2. 28
- 725  $X_{ind}$  water use efficiency of the industrial sector (unitless). See tables S70, S73. 96, 99
- $z$  gravitational potential ( $M L^{-1} T^{-2}$ ). See table S13. 39
- $Z$  vertical coordinate (L). See table S28. 54
- $Z_{cr}$  matric head induced by capillary action (L). See table S28. 54
- $\alpha$  empirical parameter (unitless). See tables S13, S24, S25, S46, S52. 39, 50, 51, 72, 78
- 730  $\beta$  empirical shape parameter. It needs to be fitted during the calibration processes (unitless). See tables S13, S18, S21, S24, S25, S31, S46. 39, 44, 47, 50, 51, 57, 72
- $\gamma$  psychrometric constant. See tables S2, S7, S11, S23, S24. 28, 33, 37, 49, 50
- $\Lambda_{rz}$  root zone soil moisture stress parameter (unitless). See table S7. 33
- $\Gamma$  gamma function (unitless). See tables S31, S46. 57, 72
- 735  $\delta$  time variation (unitless). See tables S3, S8, S9, S10, S11, S12, S13, S14, S20, S24, S25, S28, S29, S30, S32, S35, S39, S43, S44, S45, S46. 29, 34–36, 38–40, 46, 50, 51, 54–56, 58, 61, 65, 69–72
- $\Delta t$  time step (T). See tables S4, S5, S7, S8, S9, S10, S11, S12, S13, S20, S25, S30, S34, S35, S37, S43, S45, S46, S53, S59, S69. 30, 31, 33–39, 46, 51, 53, 56, 60, 63, 71, 72, 78, 79, 85, 95
- $\epsilon_c$  empirical constant (17.8), found by calibration [25] (unitless). See table S2. 28
- 740  $\zeta_{sn}$  snow layer thickness of layer  $j$  ( $L^3 L^{-2}$ ). See table S12. 38
- $\zeta_{so,i}$  soil layer thickness of layer  $i$  (L). See table S13, S52. 39, 78
- $\eta$  parameter (unitless). See table S31. 57
- $\theta$  air temperature ( $\Theta$ ). Note: in the equations, air temperature is in Kelvin degrees. See tables S2, S7, S8, S9, S10, S11, S12, S25. 28, 33–36, 38, 51
- 745  $\theta_{day,max}$  daily maximum air temperature ( $\Theta$ ). See table S2. 28
- $\theta_{day,mean}$  daily mean air temperature ( $\Theta$ ). See table S2. 28
- $\theta_{day,min}$  daily minimum air temperature ( $\Theta$ ). See table S2. 28
- $\theta_f$  triple point temperature for water ( $\Theta$ ). See table S12. 38
- $\theta_{freeze}$  freezing temperature ( $\Theta$ ). See table S12. 38
- 750  $\theta_{min}$  minimum air temperature ( $\Theta$ ). See table S7. 33
- $\theta_{,month}$  mean monthly air temperature ( $\Theta$ ). See table S2. 28
- $\theta_M$  air temperature above 0 ( $\Theta$ ). See tables S8, S12. 34, 38

- $\theta_{sn}$  snow temperature ( $\Theta$ ). See table S12. 38
- $\theta_{sn,i}$  snow temperature of layer  $i$  ( $\Theta$ ). See table S12. 38
- 755  $\theta_{so}$  soil temperature ( $\Theta$ ). See tables S12, S23, S25. 38, 49, 51
- $\theta_{so,i}$  soil temperature of soil layer  $i$  ( $\Theta$ ). See table S13. 39
- $\theta_{so,i+1}$  soil temperature of soil layer  $i + 1$  ( $\Theta$ ). See table S13. 39
- $\theta_{su}$  temperature of the surface layer ( $\Theta$ ). See table S10. 36
- $\theta_{SG_i}$  mean air temperature in a subgrid cell Müller Schmied et al. [34] ( $\Theta$ ). See tables S8, S12, S13. 34, 38, 39
- 760  $\theta_{veg}$  vegetation temperature ( $\Theta$ ). See table S23. 49
- $\iota$  storage parameter, defined as the hydraulic retention time of a single linear reservoir segment of length  $l_{ri}$ . It can be calculated as the average travel time of water through a single river segment (unitless). See table S46. 72
- $\kappa$  calibration constant ( $2.3 \times 10^3$ ) that approximately compensates for the differences in advection or in vapour transfer effect [25] (unitless). See tables S2. 28
- 765  $\kappa_{gw}$  retention time for water in the groundwater storage (L). See table S30. 57
- $\kappa_{ol}$  retention time for water in the overland flow storage (L). See table S44. 45
- $\kappa_{ri}$  retention time for water in the river flow storage (L). See tables S43, S46. 69, 72
- $\lambda$  water distribution uniformity scalar, depending on the irrigation system. See table S57. 78
- $\nu$  decay coefficient (T). See table S13. 39
- 770  $\Pi_{R_{in}}$  infiltration shape parameter (unitless). See tables S20, S24. 46, 50
- $\rho_{air}$  density of atmospheric air ( $M L^{-3}$ ). See tables S2, S7, S11, S23, S24. 28, 33, 37, 49, 50
- $\rho_{ice}$  intrinsic density of ice ( $M L^{-3}$ ). See table S12. 38
- $\rho_{sn,i}$  snow density of layer  $i$  ( $M L^{-3}$ ). See table S12. 38
- $\rho_w$  density water ( $M L^{-3}$ ). See tables S8, S9, S10, S11. 34, 36, 37, 78
- 775  $\sigma$  subgrid topographical variability (unitless). See table S20. 46
- $\tau$  time constant (T). See table S25. 51
- $v$  scale parameter (unitless). See tables S31, S24. 50, 57
- $\phi_{so}$  soil porosity ( $L^3$ ). See tables S13, S20, S22. 39, 46, 78
- $\chi$  constant, energy needed to melt ice ( $M L^{-2} T^{-2} L^{-3}$ ). See table S12. 38
- 780  $\chi_f$  energy of fusion ( $M L^2 T^{-3} L^{-2}$ ). See table S12. 38
- $\chi_M$  energy flux given to the pack because of liquid water refreezing or removed from the pack during melt ( $M L^{-2} T^{-2} L^{-3}$ ). See tables S8, S10. 34, 36
- $\chi_{rs}$  energy flux advected to the snowpack by rain or snow ( $M L^{-2} T^{-2} L^{-3}$ ). See tables S10, S12. 36, 38

- $\chi_{to}$  total energy ( $M L^2 T^{-2} L^{-2}$ ). See table S12. 38
- 785  $\Psi$  matric potential ( $M L^{-1} T^{-2}$ ). See table S13. 39
- $\Psi_i$  soil matric potential of layer  $i$  ( $M L^{-1} T^{-2}$ ). See table S28. 54
- $\Psi_{j_{wt}}$  matric potential of the layer directly above the water table ( $M L^{-1} T^{-2}$ ). See table S30. 56
- $\Psi_{sat}$  saturated soil matric potential ( $M L^{-1} T^{-2}$ ). See table S13. 39
- $\Psi_{sat,i}$  saturated soil matric potential of layer  $i$  ( $M L^{-1} T^{-2}$ ). See table S28. 54
- 790  $\Psi_{wt}$  matric potential at the water table (i.e. 0) ( $M L^{-1} T^{-2}$ ). See table S30. 56

**Table S1.** Actual evapotranspiration ( $AET$ )

| Model      | Equation                                                                                                                                           |
|------------|----------------------------------------------------------------------------------------------------------------------------------------------------|
| CLM4.5     | $AET = E_{ca} + E_{so} + T$                                                                                                                        |
| CLM5.0     | $AET = E_{ca} + E_{so} + T$                                                                                                                        |
| CWatM      | $AET = E_{ca} + E_{la} + E_{re} + E_{ri} + E_{sn} + E_{so} + T$                                                                                    |
| DBH        | $AET = E_{ca} + E_{so} + T$                                                                                                                        |
| H08        | $AET = E_{so}$                                                                                                                                     |
| JULES-W1   | $AET = E_{ca} + E_{sn} + E_{so} + T$                                                                                                               |
| LPJmL      | $AET = E_{ca} + E_{la} + E_{re} + E_{ri} + E_{sn} + E_{so} + T$                                                                                    |
| Mac-PDM.20 | $AET = E_{ca} + E_{so}$                                                                                                                            |
| MATSIRO    | $AET = E_{ca}^{sn,cov} + E_{ca}^{sn,free} + E_{sn} + E_{so,ice} + E_{so,l}^{sn,freegr}$                                                            |
| mHM        | $AET = E_{ca} + ET_{so,i}$                                                                                                                         |
| MPI-HM     | $AET = A_{irr} + E_{so} + E_{we} + T$                                                                                                              |
| ORCHIDEE   | $AET = E_{ca} + E_{floodplain} + E_{sn} + E_{so}$                                                                                                  |
| PCR-GLOBWB | $AET = E_{ca} + E_{la} + E_{re} + E_{ri} + E_{so}$                                                                                                 |
| VIC        | $AET = \sum_{n=1}^N f_{ca,n} \times (E_{ca} + T) + f_{so,bare} \times E_{so}$<br>for: $\sum_{n=1}^{N+1} f_{ca,n} = 1$ see details [28]; [29]; [20] |
| WaterGAP2  | $AET = E_{ca} + E_{la} + E_{re} + E_{sn} + E_{so} + E_{we}$                                                                                        |
| WAYS       | $AET = E_{so}$                                                                                                                                     |

**Table S2.** Potential evapotranspiration ( $PET$ )

| Model      | Equation                                                                                                                                                                                                                                                                                                                                                                                                                                                                                                                                                 |
|------------|----------------------------------------------------------------------------------------------------------------------------------------------------------------------------------------------------------------------------------------------------------------------------------------------------------------------------------------------------------------------------------------------------------------------------------------------------------------------------------------------------------------------------------------------------------|
| CLM4.5     | not represented                                                                                                                                                                                                                                                                                                                                                                                                                                                                                                                                          |
| CLM5.0     | not represented                                                                                                                                                                                                                                                                                                                                                                                                                                                                                                                                          |
| CWatM      | $PET = \frac{0.408 \times s_{vp,sat} \times (NR_n - H_{so}) + \gamma \times \frac{900}{\theta} \times W_2 \times (e_{sat} + e_{act})}{s_{vp,sat} + \gamma \times (1 + 0.34 \times W_2)}$                                                                                                                                                                                                                                                                                                                                                                 |
| DBH        | not represented                                                                                                                                                                                                                                                                                                                                                                                                                                                                                                                                          |
| H08        | $PET = \begin{cases} \rho_{air} \times r_w \times (q_{sat}^{gr} - q_{gr}), & \text{snow present} \\ \rho_{air} \times r_w \times (q_{sat}^{gr} - q_{gr}) \times \frac{(1+zeta \times X_{et})}{(1+zeta)}, & \text{snow absence} \end{cases}$ <p>Where zeta is <math>\zeta</math> in Milly [31].<br/> And <math>X_{et} = \begin{cases} 1.0, &amp; 0.75 \times S_{so,FC} &lt; S_{so} \\ \frac{W \times S_{so}}{0.75 \times S_{so,FC}}, &amp; 0.75 \times S_{so,FC} &gt; S_{so} \end{cases}</math></p>                                                       |
| JULES-W1   | $PET = \frac{0.408 \times s_{vp,sat} \times (NR_n - H_{so}) + \gamma \times \frac{900}{\theta} \times W_2 \times (e_{sat} + e_{act})}{\frac{s_{vp,sat} + \gamma \times (1 + 0.34 \times W_2)}{2 \times PAR}}$                                                                                                                                                                                                                                                                                                                                            |
| LPJmL      | $PET = \frac{s_{vp,sat}}{(s_{vp,sat} + \gamma \times \theta)} \times \frac{H_{l,E}}{H_{l,E}}$                                                                                                                                                                                                                                                                                                                                                                                                                                                            |
| Mac-PDM.20 | $PET = \frac{s_{vp,sat} \times (NR_n - H_{so}) + \gamma \times c_{air} \times (e_{sat} - e_{sat,dew}) \times r_w}{(597.3 - (\theta - 273.15) \times 0.564) \times (s_{vp,sat} + \gamma \times (1 + \frac{r_w}{r_{ca}}))}$                                                                                                                                                                                                                                                                                                                                |
| MATSIRO    | $PET = \frac{0.408 \times s_{vp,sat} \times (NR_n - H_{so}) + \gamma \times \frac{900}{\theta} \times W_2 \times (e_{sat} + e_{act})}{s_{vp,sat} + \gamma \times (1 + 0.34 \times W_2)}$ <p>(used only in crop growth scheme)</p>                                                                                                                                                                                                                                                                                                                        |
| mHM        | $PET = \kappa \times SR \times ((\theta_{day,mean} - 273.15) + \epsilon_c) \times \sqrt{\theta_{day,max} - \theta_{day,min}}. \text{ See [25]}$                                                                                                                                                                                                                                                                                                                                                                                                          |
| MPI-HM     | $PET = \frac{0.408 \times s_{vp,sat} \times (NR_n - H_{so}) + \gamma \times \frac{900}{\theta} \times W_2 \times (e_{sat} + e_{act})}{s_{vp,sat} + \gamma \times (1 + 0.34 \times W_2)}$                                                                                                                                                                                                                                                                                                                                                                 |
| ORCHIDEE   | $PET = \rho_{air} \times C_{bulk} \times W \times (q_{sat}^{gr} - q). \text{ See [33]; [31]}$                                                                                                                                                                                                                                                                                                                                                                                                                                                            |
| PCR-GLOBWB | $PET = 1 \times 0.165 \times 216.7 \times t_{year} \times \frac{e_{sat}}{(\theta_{month} - 273.15) + 273.3}$                                                                                                                                                                                                                                                                                                                                                                                                                                             |
| VIC        | $PET = \frac{0.408 \times s_{vp,sat} \times (NR_n - H_{so}) + \rho_{air} \times c_{air} \times \frac{(e_{sat} + e_{act})}{r_w}}{s_{vp,sat} + \gamma}$                                                                                                                                                                                                                                                                                                                                                                                                    |
| WaterGAP2  | $PET = C_{PT} \times \frac{s_{vp,sat}}{s_{vp,sat} + \gamma} \times NR$ $C_{PT} = \begin{cases} 1.26, & G = \text{humid} \\ 1.74, & G = \text{arid or semi-arid} \end{cases}$ $s_{vp,sat} = \frac{4098 \times 0.6108 \times \exp(\frac{17.27 \times (\theta - 273.15)}{\theta - 35.85})}{(\theta - 35.85)^2}$ $\gamma = \frac{0.0016286 \times 101.3}{H_l}$ $H_l = \begin{cases} 2.501 + 0.334(\text{MJ kg}^{-1}), & \theta < 273.15 \\ 2.501 - 0.002361(\text{MJ kg}^{-1}) \times (\theta - 273.15), & \theta \geq 273.15 \end{cases}. \text{ See [13]}$ |
| WAYS       | $PET = \frac{0.408 \times s_{vp,sat} \times (NR_n - H_{so}) + \gamma \times \frac{900}{\theta} \times W_2 \times (e_{sat} + e_{act})}{s_{vp,sat} + \gamma \times (1 + 0.34 \times W_2)}$                                                                                                                                                                                                                                                                                                                                                                 |

**Table S3.** Canopy storage ( $S_{ca}$ )

| Model      | Equation                                                                                                                                                                                                                                               | Water Flux              |                                                |
|------------|--------------------------------------------------------------------------------------------------------------------------------------------------------------------------------------------------------------------------------------------------------|-------------------------|------------------------------------------------|
|            |                                                                                                                                                                                                                                                        | Inflows                 | Outflows                                       |
| CLM4.5     | $\frac{\delta S_{ca}}{\delta t} = P_{int} - (P_{th,l} + P_{th,s}) - E_{ca}$                                                                                                                                                                            | $P_{int}$               | $P_{th,l}$ $P_{th,s}$<br>$E_{ca}$              |
| CLM5.0     | $\frac{\delta S_{ca}}{\delta t} = P_{int} - (P_{th,l} + P_{th,s}) - E_{ca}$                                                                                                                                                                            | $P_{int}$               | $P_{th,l}$ $P_{th,s}$<br>$E_{ca}$              |
| CWatM      | $\frac{\delta S_{ca}}{\delta t} = P_{tot} - P_{th} - E_{ca}$                                                                                                                                                                                           | $P_{tot}$               | $E_{ca}$ $P_{th}$                              |
| DBH        | $\frac{\delta S_{ca}}{\delta t} = P_{tot} - P_{th} - E_{ca}$                                                                                                                                                                                           | $P_{tot}$               | $E_{ca}$ $P_{th}$                              |
| H08        | not represented                                                                                                                                                                                                                                        |                         |                                                |
| JULES-W1   | $\frac{\delta S_{ca}}{\delta t} = P_{tot} - P_{th} - E_{ca}$                                                                                                                                                                                           | $P_{tot}$               | $E_{ca}$ $P_{th}$                              |
| LPJmL      | $\frac{\delta S_{ca}}{\delta t} = P_{tot} - P_{th} - E_{ca}$                                                                                                                                                                                           | $P_{tot}$               | $E_{ca}$ $P_{th}$                              |
| Mac-PDM.20 | not represented (all water intercepted is assumed to evaporate)                                                                                                                                                                                        |                         |                                                |
| MATSIRO    | $\frac{\delta S_{ca}}{\delta t} = \frac{\delta S_{ca,l}}{\delta t} + \frac{\delta S_{ca,s}}{\delta t}$<br>$\frac{\delta S_{ca,l}}{\delta t} = P_{int,l} - P_{th,l} - E_{ca,l}$<br>$\frac{\delta S_{ca,s}}{\delta t} = P_{int,s} - P_{th,s} - E_{ca,s}$ | $P_{int,l}$ $P_{int,s}$ | $E_{ca,l}$ $E_{ca,s}$<br>$P_{th,l}$ $P_{th,s}$ |
| mHM        | $\frac{\delta S_{ca}}{\delta t} = P_{tot} - P_{th} - E_{ca}$                                                                                                                                                                                           | $P_{tot}$               | $E_{ca}$ $P_{th}$                              |
| MPI-HM     | not represented                                                                                                                                                                                                                                        |                         |                                                |
| ORCHIDEE   | $\frac{\delta S_{ca}}{\delta t} = P_{tot} - P_{th} - E_{ca}$                                                                                                                                                                                           | $P_{tot}$               | $E_{ca}$ $P_{th}$                              |
| PCR-GLOBWB | $\frac{\delta S_{ca}}{\delta t} = P_{tot} - P_{th} - E_{ca}$                                                                                                                                                                                           | $P_{tot}$               | $E_{ca}$ $P_{th}$                              |
| VIC        | $\frac{\delta S_{ca}}{\delta t} = P_{tot} - P_{th} - E_{ca}$ See [28]                                                                                                                                                                                  | $P_{tot}$               | $E_{ca}$ $P_{th}$                              |
| WaterGAP2  | $\frac{\delta S_{ca}}{\delta t} = P_{tot} - P_{th} - E_{ca}$                                                                                                                                                                                           | $P_{tot}$               | $E_{ca}$ $P_{th}$                              |
| WAYS       | $\frac{\delta S_{ca}}{\delta t} = P_{tot} - P_{th} - E_{ca}$                                                                                                                                                                                           | $P_{tot}$               | $E_{ca}$ $P_{th}$                              |

**Table S4.** Precipitation intercepted by canopy storage ( $P_{int}$ )

| Model      | Equation                                                                                                                                                                                                                                                                                                                                                                                                                                                                                                                                                                                                                                                                                                                                                                     |
|------------|------------------------------------------------------------------------------------------------------------------------------------------------------------------------------------------------------------------------------------------------------------------------------------------------------------------------------------------------------------------------------------------------------------------------------------------------------------------------------------------------------------------------------------------------------------------------------------------------------------------------------------------------------------------------------------------------------------------------------------------------------------------------------|
| CLM4.5     | $P_{int} = 0.25 \times (P_{ra} + P_{sn}) \times \left(1 - \exp\left(-0.5 \times (LAI + SAI)\right)\right)$<br>0.25 = scales interception from point to grid cell                                                                                                                                                                                                                                                                                                                                                                                                                                                                                                                                                                                                             |
| CLM5.0     | $P_{int} = 0.25 \times (P_{ra} + P_{sn}) \times \left(1 - \exp\left(-0.5 \times (LAI + SAI)\right)\right)$<br>0.25 = scales interception from point to grid cell                                                                                                                                                                                                                                                                                                                                                                                                                                                                                                                                                                                                             |
| CWatM      | $P_{int} = \min(P_{tot}, S_{ca,max})$<br>$S_{ca,max}$ from Global Land Cover Characteristics database version 2.0 varying every 10 days depending on land use class                                                                                                                                                                                                                                                                                                                                                                                                                                                                                                                                                                                                          |
| DBH        | $P_{int} = P_{tot} \times \left(f_{ca} + f_{ca} \times \exp\left(\frac{C_{P,l} \times LAI}{f_{ca}}\right)\right)$                                                                                                                                                                                                                                                                                                                                                                                                                                                                                                                                                                                                                                                            |
| H08        | not represented                                                                                                                                                                                                                                                                                                                                                                                                                                                                                                                                                                                                                                                                                                                                                              |
| JULES-W1   | not represented                                                                                                                                                                                                                                                                                                                                                                                                                                                                                                                                                                                                                                                                                                                                                              |
| LPJmL      | not represented                                                                                                                                                                                                                                                                                                                                                                                                                                                                                                                                                                                                                                                                                                                                                              |
| Mac-PDM.20 | $P_{int} = I_{cap} \times (1.0 - \exp(-0.5 \times P_{tot}))$                                                                                                                                                                                                                                                                                                                                                                                                                                                                                                                                                                                                                                                                                                                 |
| MATSIRO    | $P_{int,l} = (B_{stormy} \times P_{int,l,stormy}) + \left((1 - B_{stormy}) \times P_{int,l,calm}\right)$<br>$P_{int,s} = (B_{stormy} \times P_{int,s,stormy}) + \left((1 - B_{stormy}) \times P_{int,s,calm}\right)$<br>$P_{int,l,stormy} = \min\left(f_{LAI} \times \left(P_{gr,l,calm} + \frac{P_{gr,l,stormy}}{B_{stormy}}\right), \frac{S_{ca,max} - S_{ca,l}}{\Delta t}\right)$<br>$P_{int,l,calm} = \min\left(f_{LAI} \times P_{gr,l,calm}, \frac{S_{ca,max} - S_{ca,l}}{\Delta t}\right)$<br>$P_{int,s,stormy} = \min\left(f_{LAI} \times \left(P_{gr,s,calm} + \frac{P_{gr,s,stormy}}{B_{stormy}}\right), \frac{S_{ca,max} - S_{ca,s}}{\Delta t}\right)$<br>$P_{int,s,calm} = \min\left(f_{LAI} \times P_{gr,s,calm}, \frac{S_{ca,max} - S_{ca,s}}{\Delta t}\right)$ |
| mHM        | $P_{int} = \min(P_{tot}, S_{ca,max})$                                                                                                                                                                                                                                                                                                                                                                                                                                                                                                                                                                                                                                                                                                                                        |
| MPI-HM     | not represented                                                                                                                                                                                                                                                                                                                                                                                                                                                                                                                                                                                                                                                                                                                                                              |
| ORCHIDEE   | not represented                                                                                                                                                                                                                                                                                                                                                                                                                                                                                                                                                                                                                                                                                                                                                              |
| PCR-GLOBWB | not represented                                                                                                                                                                                                                                                                                                                                                                                                                                                                                                                                                                                                                                                                                                                                                              |
| VIC        | not represented                                                                                                                                                                                                                                                                                                                                                                                                                                                                                                                                                                                                                                                                                                                                                              |
| WaterGAP2  | $P_{int} = P_{tot} - (S_{ca,max} - S_{ca})$                                                                                                                                                                                                                                                                                                                                                                                                                                                                                                                                                                                                                                                                                                                                  |
| WAYS       | $P_{int,l} = P_{ra} - (S_{ca,max} - S_{ca})$                                                                                                                                                                                                                                                                                                                                                                                                                                                                                                                                                                                                                                                                                                                                 |

**Table S5.** Throughfall ( $P_{th}$ )

| Model      | Equation                                                                                                                                                                                                                                                               |
|------------|------------------------------------------------------------------------------------------------------------------------------------------------------------------------------------------------------------------------------------------------------------------------|
| CLM4.5     | $P_{th,l} = \frac{S_{ca,int} - S_{ca,max}}{\Delta t} \times \frac{P_{ra}}{P_{ra} + P_{sn}} \geq 0$ $P_{th,s} = \frac{S_{ca,int} - S_{ca,max}}{\Delta t} \times \frac{P_{sn}}{P_{ra} + P_{sn}} \geq 0$ $S_{ca,int} = S_{ca} + P_{int} \times \Delta t \geq 0$           |
| CLM5.0     | $P_{th,l} = \frac{S_{ca,int} - S_{ca,max}}{\Delta t} \times \frac{P_{ra}}{P_{ra} + P_{sn}} \geq 0$ $P_{th,s} = \frac{S_{ca,int} - S_{ca,max}}{\Delta t} \times \frac{P_{sn}}{P_{ra} + P_{sn}} \geq 0$ $S_{ca,int} = S_{ca} + P_{int} \times \Delta t \geq 0$           |
| CWatM      | $P_{th} = P_{tot} + S_{ca} - E_{ca}$                                                                                                                                                                                                                                   |
| DBH        | $P_{th} = P_{tot} \times \left( 1 - f_{ca} + \left( f_{ca} \times \exp \frac{-C_{P,l} \times LAI}{f_{ca}} \right) \right)$                                                                                                                                             |
| H08        | not represented                                                                                                                                                                                                                                                        |
| Jules-W1   | $P_{th} = P_{tot} \times \left( \left( 1 - \frac{S_{ca}}{S_{ca,max}} \right)^{\frac{f_{Pc,G} \times S_{ca,max}}{P_{tot} \times \Delta t}} \right) + \left( P_{tot} \times \frac{S_{ca}}{S_{ca,max}} \right)$ . See [5]                                                 |
| LPJmL      | $P_{th} = P_{tot} - E_{ca}$                                                                                                                                                                                                                                            |
| Mac-PDM.20 | not represented                                                                                                                                                                                                                                                        |
| MATSIRO    | $P_{th} = P_{dr} + (P_{tot} - P_{int})$ $P_{int} = P_{int,l} + P_{int,s}$ $P_{dr} = P_{dr,l} + P_{dr,s}$ $P_{dr,l} = 1.14 \times 10^{-11} \times \exp(3.7 \times 10^3 \times S_{ca,l})$ $P_{dr,s} = 1.14 \times 10^{-11} \times \exp(3.7 \times 10^3 \times S_{ca,s})$ |
| mHM        | $P_{th} = \max(0, P_{tot} - (S_{ca,max} - S_{ca}))$                                                                                                                                                                                                                    |
| MPI-HM     | not represented                                                                                                                                                                                                                                                        |
| ORCHIDEE   | $P_{th} = (P_{tot} \times (f_{ca,max} \times (1 - \exp(-LAI)))) \times C_{P_{th}}$                                                                                                                                                                                     |
| PCR-GLOBWB | $P_{th} = \begin{cases} P_{tot}, & S_{ca} \geq S_{ca,max} \\ 0, & S_{ca} < S_{ca,max} \end{cases}$                                                                                                                                                                     |
| VIC        | $P_{th} = P_{mean,G} \times \exp\left(\frac{-f \times S_{ca,dif}}{P_{mean,G}}\right)$ $S_{ca,dif} = \frac{S_{ca,max} - S_{ca}}{\Delta t}$                                                                                                                              |
| WaterGAP2  | $P_{th} = \begin{cases} 0, & P_{tot} < (S_{ca,max} - S_{ca}) \\ P_{tot} - (S_{ca,max} - S_{ca}), & \text{other} \end{cases}$                                                                                                                                           |
| WAYS       | $P_{th} = \max(0, P_{tot} - (S_{ca,max} - S_{ca}))$                                                                                                                                                                                                                    |



**Table S6.** Precipitation falls directly to the ground ( $P_{gr}$ )

| Model      | Equation                                                                                                        |
|------------|-----------------------------------------------------------------------------------------------------------------|
| CLM4.5     | $P_{gr,l} = P_{ra} \times (1 - 0.25 \times (1 - \exp(-0.5 \times (LAI + SAI))))$                                |
|            | $P_{gr,s} = P_{sn} \times (1 - 0.25 \times (1 - \exp(-0.5 \times (LAI + SAI))))$                                |
| CLM5.0     | $P_{gr,l} = P_{ra} \times (1 - 0.25 \times (1 - \exp(-0.5 \times (LAI + SAI))))$                                |
|            | $P_{gr,s} = P_{sn} \times (1 - 0.25 \times (1 - \exp(-0.5 \times (LAI + SAI))))$                                |
| CWatM      | not represented                                                                                                 |
| DBH        | not represented                                                                                                 |
| H08        | no canopy compartment, rainfall and snowfall fall directly to the ground. $P_{gr} = P_{ra} + P_{sn}$            |
| JULES-W1   | not represented                                                                                                 |
| LPJmL      | not represented                                                                                                 |
| Mac-PDM.20 | not represented                                                                                                 |
| MATSIRO    | computed same as table S5                                                                                       |
| mHM        | not represented                                                                                                 |
| MPI-HM     | not represented                                                                                                 |
| ORCHIDEE   | not represented                                                                                                 |
| PCR-GLOBWB | not represented                                                                                                 |
| VIC        | $P_{gr} = - \left( \frac{P_{mean,G}}{f_{BP}} \right) \times \ln(f_P)$ ; for $0 < f_P \leq 1$ . See details [29] |
| WaterGAP2  | not represented                                                                                                 |
| WAYS       | not represented                                                                                                 |

**Table S7.** Canopy evaporation ( $E_{ca}$ )

| Model      | Equation                                                                                                                                                                                                                                                                                                                                                                                                                                                                                                                                                                                                                                                                                                                                                                                                                                                                                                                                                                                   |
|------------|--------------------------------------------------------------------------------------------------------------------------------------------------------------------------------------------------------------------------------------------------------------------------------------------------------------------------------------------------------------------------------------------------------------------------------------------------------------------------------------------------------------------------------------------------------------------------------------------------------------------------------------------------------------------------------------------------------------------------------------------------------------------------------------------------------------------------------------------------------------------------------------------------------------------------------------------------------------------------------------------|
| CLM4.5     | $E_{ca} = -\rho_{air} \times \left( \frac{g_{st}^w + q}{r_{tot}} \right)$                                                                                                                                                                                                                                                                                                                                                                                                                                                                                                                                                                                                                                                                                                                                                                                                                                                                                                                  |
| CLM5.0     | $E_{ca} = -\rho_{air} \times \left( \frac{g_{st}^w + q}{r_{tot}} \right)$                                                                                                                                                                                                                                                                                                                                                                                                                                                                                                                                                                                                                                                                                                                                                                                                                                                                                                                  |
| CWatM      | $E_{ca} = PET \times \left( \frac{S_{ca}}{S_{ca,max}} \right)^{\frac{2}{3}}$ where: $S_{ca,max} = LAI$<br>$LAI$ is varying every 10 days depending on land use class                                                                                                                                                                                                                                                                                                                                                                                                                                                                                                                                                                                                                                                                                                                                                                                                                       |
| DBH        | $E_{ca} = \frac{1}{H_{l,E}} \times \left( \frac{e_{ca} - e}{r_b} \right) \times \left( \frac{\rho_{air} \times C_{air}}{\gamma} \right) \times f_{ca,sn}$                                                                                                                                                                                                                                                                                                                                                                                                                                                                                                                                                                                                                                                                                                                                                                                                                                  |
| H08        | not represented                                                                                                                                                                                                                                                                                                                                                                                                                                                                                                                                                                                                                                                                                                                                                                                                                                                                                                                                                                            |
| Jules-W1   | $E_{ca} = f_a \times PET$ . See [4]                                                                                                                                                                                                                                                                                                                                                                                                                                                                                                                                                                                                                                                                                                                                                                                                                                                                                                                                                        |
| LPJmL      | $E_{ca} = \min\{PET, S_{ca}\}$                                                                                                                                                                                                                                                                                                                                                                                                                                                                                                                                                                                                                                                                                                                                                                                                                                                                                                                                                             |
| Mac-PDM.20 | $E_{ca} = P_{int}$ (all intercepted precipitation is assumed to evaporate)                                                                                                                                                                                                                                                                                                                                                                                                                                                                                                                                                                                                                                                                                                                                                                                                                                                                                                                 |
| MATSIRO    | $E_{ca} = (E_{ca,l} + E_{ca,s})$ ;<br>where:<br>$E_{ca,l}^{t+1} = (1 - f_{sn}) \times f_{w,lf} \times H_{l,E} \times \rho_{air} \times C_{bulk,Ei} \times W \times (q_{sat}^{t+1} - q)$ ;<br>$E_{ca,s}^{t+1} = (1 - f_{sn}) \times f_{w,lf} \times H_{l,E_{sn}} \times \rho_{air} \times C_{bulk,Ei}^{sn} \times W \times (q_{sat}^{sn,t+1} - q)$ ;<br>$H_l = \begin{cases} H_{l,E}, & \theta < 273.15 \\ H_{l,E_{sn}}, & \theta > 273.15 \end{cases}$                                                                                                                                                                                                                                                                                                                                                                                                                                                                                                                                     |
| mHM        | $E_{ca} = \begin{cases} PET \times \left( \frac{S_{ca}}{S_{ca,max}} \right)^{\frac{2}{3}}, & S_{ca,max} > 0 \\ 0, & S_{ca,max} = 0 \end{cases}$                                                                                                                                                                                                                                                                                                                                                                                                                                                                                                                                                                                                                                                                                                                                                                                                                                            |
| MPI-HM     | not represented                                                                                                                                                                                                                                                                                                                                                                                                                                                                                                                                                                                                                                                                                                                                                                                                                                                                                                                                                                            |
| ORCHIDEE   | $E_{ca} = (q_{sat}^{ca} - q) \times W \times C_{su} \times (1 - r_{sn}) \times r_{ca}$                                                                                                                                                                                                                                                                                                                                                                                                                                                                                                                                                                                                                                                                                                                                                                                                                                                                                                     |
| PCR-GLOBWB | $E_{ca} = PET$                                                                                                                                                                                                                                                                                                                                                                                                                                                                                                                                                                                                                                                                                                                                                                                                                                                                                                                                                                             |
| VIC        | $E_{ca,max} = PET \times \left( \frac{S_{ca}}{S_{ca,max}} \right)^{\frac{2}{3}} \times \frac{r_w}{(r_w + r_o)}$<br>$S_{ca,max} = 0.2 \times LAI_{month}$<br>$E_{ca} = E_{ca,max} \times f$<br>$f = \min \left( 1, \frac{S_{ca} + P_{tot} \times \Delta t}{E_{ca,max} \times \Delta t} \right)$ . See [28]                                                                                                                                                                                                                                                                                                                                                                                                                                                                                                                                                                                                                                                                                  |
| WaterGAP2  | $E_{ca} = PET \times \left( \frac{S_{ca}}{S_{ca,max}} \right)^{\frac{2}{3}}$<br>where:<br>$S_{ca,max} = 0.3\text{mm} \times LAI$<br>$LAI$ is calculated based on simple growth model and based on land cover characteristics, see [34].                                                                                                                                                                                                                                                                                                                                                                                                                                                                                                                                                                                                                                                                                                                                                    |
| WAYS       | $E_{ca} = PET \times \left( \frac{S_{ca}}{S_{ca,max}} \right)^{\frac{2}{3}}$ where: $S_{ca,max} = 0.3\text{mm} \times LAI$<br>The leaf area index ( $LAI$ ) is seasonal varying which is determined by the growing-season index ( $i_{GS}$ ), day length ( $t$ ) and the current root zone water storage ( $S_{rz}$ ), see [54].<br>$LAI = LAI_{min} + i_{GS} \times (LAI_{max} - LAI_{min}) \times$<br>$i_{GS} = f(\theta_{min}) \times f(t) \times f(S_{rz})$<br>$f(\theta_{min}) = \begin{cases} 0, & \theta_{min} \leq 271.15 \\ \frac{\theta_{min} - 271.15}{278.15 - 271.15}, & 271.15 < \theta_{min} < 278.15; \\ 1, & \theta_{min} \geq 278.15 \end{cases}$<br>$f(t) = \begin{cases} 0, & t \leq 36000 \\ \frac{t - 36000}{39600 - 36000}, & 36000 < t < 39600 \\ 1, & t \geq 39600 \end{cases}$<br>$\frac{S_{rz} \times (S_{rz,max} + \Lambda_{rz})}{S_{rz,max} \times (S_{rz} + \Lambda_{rz})}$<br>The root zone soil moisture stress parameter $\Lambda_{rz}$ is fixed at 0.07. |

**Table S8.** Snow storage ( $S_{sn}$ )

| Model      | Equation                                                                                                                                                                                                                                                                                                                                                                  | Water Flux                         |                                              |
|------------|---------------------------------------------------------------------------------------------------------------------------------------------------------------------------------------------------------------------------------------------------------------------------------------------------------------------------------------------------------------------------|------------------------------------|----------------------------------------------|
|            |                                                                                                                                                                                                                                                                                                                                                                           | Inflows                            | Outflows                                     |
| CLM4.5     | $\frac{\delta S_{sn,ice}}{\delta t} = \begin{cases} f_{sn} \times (P_{sn} + (F - E_{sn})) - M, & i = S_{sn,i} + 1 \\ -M, & i = S_{sn,i} + 2, \dots, 0 \end{cases}$ $\frac{\delta S_{sn,l}}{\delta t} = \begin{cases} f_{sn} \times (P_{ra} + (E_{dew} - E_{so})) - M_{out} + M, & i = S_{sn,i} + 1 \\ (M_{in} - M_{out}) + M, & i = S_{sn,i} + 2, \dots, 0 \end{cases}$   | $P_{sn}$<br>$F$                    | $P_{ra}$ $E_{dew}$<br>$E_{sn}$ $M$ $M_{out}$ |
| CLM5.0     | $\frac{\delta S_{sn,ice}}{\delta t} = \begin{cases} f_{sn} \times (P_{sn} + (F - E_{sn})) - M, & i = S_{sn,i} + 1 \\ -M, & i = S_{sn,i} + 2, \dots, 0 \end{cases}$ $\frac{\delta S_{sn,l}}{\delta t} = \begin{cases} (f_{sn} \times (P_{ra} + (E_{dew} - E_{so})) - M_{out}) + M, & i = S_{sn,i} + 1 \\ (M_{in} - M_{out}) + M, & i = S_{sn,i} + 2, \dots, 0 \end{cases}$ | $P_{sn}$<br>$F$                    | $P_{ra}$ $E_{dew}$<br>$E_{sn}$ $M$ $M_{out}$ |
| CWatM      | $\frac{\delta S_{sn}}{\delta t} = P_{sn} - M - E_{sn}$ $P_{sn} = \begin{cases} P_{tot}, & \theta < 273.15 \\ 0, & \theta \geq 273.15 \end{cases}$                                                                                                                                                                                                                         | $P_{sn}$                           | $M$ $E_{sn}$                                 |
| DBH        | $\frac{\delta S_{sn}}{\delta t} = P_{tot} - E_{sn} - R_{in}$                                                                                                                                                                                                                                                                                                              | $P_{tot}$                          | $E_{sn}$ $R_{in}$                            |
| H08        | $\frac{\delta S_{sn}}{\delta t} = P_{sn} - M - E_{sn}$                                                                                                                                                                                                                                                                                                                    | $P_{sn}$                           | $M$ $E_{sn}$                                 |
| JULES-W1   | $\frac{\delta S_{sn}}{\delta t} = P_{tot} - M - E_{sn}$                                                                                                                                                                                                                                                                                                                   | $P_{tot}$ for<br>$\theta < 273.15$ | $M$ $E_{sn}$                                 |
| LPJmL      | $\frac{\delta S_{sn}}{\delta t} = \begin{cases} S_{sn} - P_{th} - M - E_{sn}, & \theta < 273.15 \\ S_{sn} - M - E_{sn}, & \theta > 273.15 \end{cases}$                                                                                                                                                                                                                    | $P_{th}$                           | $M$ $E_{sn}$                                 |
| Mac-PDM.20 | $\frac{\delta S_{sn}}{\delta t} = P_{sn} - M$ $P_{sn} = \begin{cases} P_{tot}, & \theta < \theta_M \\ 0, & \theta \geq \theta_M \end{cases}$                                                                                                                                                                                                                              | $P_{sn}$                           | $M$                                          |
| MATSIRO    | $\frac{\delta S_{sn}}{\delta t} = P_{s,ca} - E_{sn} - M + F$                                                                                                                                                                                                                                                                                                              | $P_{s,ca}$ $F$                     | $E_{sn}$ $M$                                 |
| mHM        | $\frac{\delta S_{sn}}{\delta t} = P_{sn} - M$ $P_{sn} = \begin{cases} P_{tot}, & \theta < \theta_M \\ 0, & \theta \geq \theta_M \end{cases}$                                                                                                                                                                                                                              | $P_{sn}$                           | $M$                                          |
| MPI-HM     | $\frac{\delta S_{sn}}{\delta t} = \frac{\delta S_{sn,ice}}{\delta t} + \frac{\delta S_{sn,l}}{\delta t}$ $\frac{\delta S_{sn,ice}}{\delta t} = P_{sn} - M + F$ $\frac{\delta S_{sn,l}}{\delta t} = M_{pot} - M - F$ $F = \begin{cases} S_{sn,l}, & \theta < 273.15 \\ 0, & \theta \geq 273.15 \end{cases}$                                                                | $P_{sn}$ $F$                       | $M$                                          |
| ORCHIDEE   | $\frac{\delta S_{sn,i}}{\delta t} = \begin{cases} P_{sn} + P_{ra} - R_{in,i} - M_i - E_{sn}, & i = 1 \\ R_{in,i-1} - R_{in,i} - M_i, & i = 2, 3 \end{cases}$ <p>See [53]</p>                                                                                                                                                                                              | $P_{sn}$ $P_{ra}$                  | $R_{in,i}$ $M$ $E_{sn}$                      |
| PCR-GLOBWB | $\frac{\delta S_{sn}}{\delta t} = P_{sn} - M$                                                                                                                                                                                                                                                                                                                             | $P_{sn}$                           | $M$                                          |
| VIC        | $\frac{\delta S_{sn,l}}{\delta t} = P_{ra} + \left( \frac{H_l}{\rho_w \times H_{l,E}} - \frac{\chi_M}{\rho_w \times H_M} \right) \times \Delta t$ $\frac{\delta S_{sn,ice}}{\delta t} = P_{sn} + \left( \frac{H_l}{\rho_w \times H_{l,E}} + \frac{\chi_M}{\rho_w \times H_M} \right) \times \Delta t. \text{ See [2]}$                                                    | $P_{ra}$ $P_{sn}$                  | $H_l$ $H_{l,E}$<br>$\chi_M$ $H_M$            |
| WaterGAP2  | $\frac{\delta S_{sn}}{\delta t} = \frac{1}{100} \times \sum_{i=1}^{100} (P_{s,SG_i} - M_{SG_i} - E_{sn,SG_i})$ $P_{s,SG_i} = \begin{cases} P_{tot}, & \theta_{SG_i} < 273.15 \\ 0, & \text{other} \end{cases}$                                                                                                                                                            | $P_{sn}$                           | $M_s$ $E_{sn}$                               |
| WAYS       | $\frac{\delta S_{sn}}{\delta t} = P_{sn} - M$                                                                                                                                                                                                                                                                                                                             | $P_{sn}$                           | $M$                                          |

**Table S9.** Snow held on the canopy ( $S_{soc}$ )

| Model      | Equation                                                                                                                                                                                            | Water Flux                              |                                     |
|------------|-----------------------------------------------------------------------------------------------------------------------------------------------------------------------------------------------------|-----------------------------------------|-------------------------------------|
|            |                                                                                                                                                                                                     | Inflows                                 | Outflows                            |
| CLM4.5     | Interception by vegetation does not distinguish between liquid and solid phases                                                                                                                     |                                         |                                     |
| CLM5.0     | $\frac{\delta S_{soc}}{\delta t} = P_{int,s} - (P_{dr,s} - U_{ca,sn}) \times \Delta t - E_{l fsm} \times \Delta t$                                                                                  | $P_{int,s}$                             | $E_{l fsm} U_{ca,sn}$<br>$P_{dr,s}$ |
| CWatM      | not represented                                                                                                                                                                                     |                                         |                                     |
| DBH        | $\frac{\delta S_{soc}}{\delta t} = P_{tot} - P_{th} - P_{dr} - E_{ca}$                                                                                                                              | $P_{tot}$                               | $P_{th} P_{dr} E_{ca}$              |
| H08        | for ambient temperature lower than the freezing temperature, precipitation is retreated as snow.<br>not represented                                                                                 |                                         |                                     |
| JULES-W1   | $\frac{\delta S_{soc}}{\delta t} = \left(0.7 \times ((4.4 \times LAI) - I_0) \times \left(1 - \exp^{-\frac{P_{tot}}{4.4 \times LAI}}\right)\right) - E_{sn} - M_{ca} - 0.4 \times M_{ca}$ . See [5] | $P_{tot}$ for<br>$\theta < 273.15; I_0$ | $M_{ca} E_{sn}$                     |
| LPJmL      | not represented                                                                                                                                                                                     |                                         |                                     |
| Mac-PDM.20 | not represented                                                                                                                                                                                     |                                         |                                     |
| MATSIRO    | $\frac{\delta S_{soc}}{\delta t} = P_{int,s} - P_{dr,s} - E_{ca,s}$                                                                                                                                 | $P_{int,s}$                             | $P_{dr,s} E_{ca,s}$                 |
| mHM        | not represented                                                                                                                                                                                     |                                         |                                     |
| MPI-HM     | not represented                                                                                                                                                                                     |                                         |                                     |
| ORCHIDEE   | not represented                                                                                                                                                                                     |                                         |                                     |
| PCR-GLOBWB | not represented                                                                                                                                                                                     |                                         |                                     |
| VIC        | $\frac{\delta S_{soc}}{\delta t} = f_{LAI} \times P_{sn}$<br>$f_{LAI} = 0.6$ See [2], [48]                                                                                                          | $P_{sn}$                                |                                     |
| WaterGAP2  | not represented                                                                                                                                                                                     |                                         |                                     |
| WAYS       | not represented                                                                                                                                                                                     |                                         |                                     |

**Table S10.** Snow under canopy ( $S_{suc}$ )

| Model      | Equation                                                                                                                             | Water Flux                         |                                  |
|------------|--------------------------------------------------------------------------------------------------------------------------------------|------------------------------------|----------------------------------|
|            |                                                                                                                                      | Inflows                            | Outflows                         |
| CLM4.5     | see table S8                                                                                                                         |                                    |                                  |
| CLM5.0     | $\frac{\delta S_{suc}}{\delta t} = f_{sn} \times (P_{int,l} + E_{dew} - E_{ca,l}) \times \Delta t$                                   | $P_{int,l}$ $E_{dew}$              | $E_{ca,l}$                       |
| CWatM      | not represented                                                                                                                      |                                    |                                  |
| DBH        | $\frac{\delta S_{suc}}{\delta t} = P_{gr,s} - E_{sn,so} - R_{in}$                                                                    | $P_{gr,s}$                         | $E_{sn,so}$ $R_{in}$             |
| H08        | not represented                                                                                                                      |                                    |                                  |
| JULES-W1   | $\frac{\delta S_{suc}}{\delta t} = P_{tot} - \frac{S_{soc}}{\delta t} - M_{underca} - E_{snunderca}$                                 | $P_{tot}$ for<br>$\theta < 273.15$ | $M_{underca}$<br>$E_{snunderca}$ |
| LPJmL      | not represented                                                                                                                      |                                    |                                  |
| Mac-PDM.20 | not represented                                                                                                                      |                                    |                                  |
| MATSIRO    | see table S8                                                                                                                         |                                    |                                  |
| mHM        | not represented                                                                                                                      |                                    |                                  |
| MPI-HM     | not represented                                                                                                                      |                                    |                                  |
| ORCHIDEE   | see table S8                                                                                                                         |                                    |                                  |
| PCR-GLOBWB | not represented                                                                                                                      |                                    |                                  |
| VIC        | $\rho_w \times c_{ice} \times \frac{\delta S_{suc} \times \theta_{su}}{\Delta t} = H_l + H_{se} + NR + \chi_M + \chi_{rs}$ . See [2] | $P_{tot}$                          | $SWE$                            |
| WaterGAP2  | not represented                                                                                                                      |                                    |                                  |
| WAYS       | not represented                                                                                                                      |                                    |                                  |

**Table S11.** Sublimation ( $E_{sn}$ )

| Model      | Equation                                                                                                                                                                                                                                                                                                     |
|------------|--------------------------------------------------------------------------------------------------------------------------------------------------------------------------------------------------------------------------------------------------------------------------------------------------------------|
| CLM4.5     | $E_{sn} = E_{so} - \max\left(E_{so} \times \frac{S_{l,sn,i+1}}{S_{ice,sn,i+1} + S_{l,sn,i+1}}, 0\right)$ for $E_{so} \geq 0$                                                                                                                                                                                 |
| CLM5.0     | $E_{sn} = \min\left(AET, \frac{S_{sn}}{\Delta t}\right)$                                                                                                                                                                                                                                                     |
| CWatM      | $E_{sn} = \min(M, E_{so})$                                                                                                                                                                                                                                                                                   |
| DBH        | $E_{sn} = \frac{1}{H_{l,E}} \times \left(\frac{e_{ca} - e}{r_b}\right) \times \left(\frac{\rho_{air} \times C_{air}}{\gamma}\right) \times f_{ca,sn} \times \frac{H_{l,E}}{H_{l,E} + H_{l,E_{sn}}}$                                                                                                          |
| H08        | $E_{sn} = PET$                                                                                                                                                                                                                                                                                               |
| JULES-W1   | $E_{sn} = \frac{\rho_{air}}{r_{so} + r_{ca}} \times (q_{sat}^{ca} - q)$<br>$E_{sn\text{underca}} = \frac{\rho_{air}}{f_{ah} + r_{ca}} \times (q_{sat}^{gr} - q)$ . See [17]; [47]                                                                                                                            |
| LPJmL      | $E_{sn} = \begin{cases} 0.1 \text{ (mm day}^{-1}\text{)}, & S_{sn} \geq 0.1 \text{ (mm)} \\ 0 \text{ (mm day}^{-1}\text{)}, & S_{sn} < 0.1 \text{ (mm)} \end{cases}$                                                                                                                                         |
| Mac-PDM.20 | not represented                                                                                                                                                                                                                                                                                              |
| MATSIRO    | $E_{sn}^{freegr^{t+1}} = (1 - f_{sn}) \times f_F \times H_{l,E_{sn}} \times \rho_{air} \times C_{bulk,Eg} \times W \times (q_{su} \times q_{sat}^{gr\ t+1} - q)$<br>$E_{sn}^{covgr^{t+1}} = f_{sn} \times H_{l,E_{sn}} \times \rho_{air} \times C_{bulk,Eg}^{sn} \times W \times (q_{sat}^{gr,sn\ t+1} - q)$ |
| mHM        | not represented                                                                                                                                                                                                                                                                                              |
| MPI-HM     | not represented                                                                                                                                                                                                                                                                                              |
| ORCHIDEE   | $E_{sn} = (q_{sat}^{ca} - q) \times W \times C_{su} \times (1 - r_{floodplain}) \times r_{sn}$                                                                                                                                                                                                               |
| PCR-GLOBWB | not represented                                                                                                                                                                                                                                                                                              |
| VIC        | $E_{sn} = \frac{H_{l,E}}{\rho_w \times H_{l,E_{sn}}}$ . See [2]                                                                                                                                                                                                                                              |
| WaterGAP2  | $E_{sn,SG_i} = PET$ see [42]                                                                                                                                                                                                                                                                                 |
| WAYS       | not represented                                                                                                                                                                                                                                                                                              |

**Table S12.** Snowmelt ( $M$ )

| Model      | Equation                                                                                                                                                                                                                                                                                                                                                                                                                                                                                                                                                                                                                                                                                                                                                                                                          |
|------------|-------------------------------------------------------------------------------------------------------------------------------------------------------------------------------------------------------------------------------------------------------------------------------------------------------------------------------------------------------------------------------------------------------------------------------------------------------------------------------------------------------------------------------------------------------------------------------------------------------------------------------------------------------------------------------------------------------------------------------------------------------------------------------------------------------------------|
| CLM4.5     | $M = \frac{H_i \times \Delta t}{H_M}$ for $i = S_{sn,i} + 1, \dots, 0$                                                                                                                                                                                                                                                                                                                                                                                                                                                                                                                                                                                                                                                                                                                                            |
| CLM5.0     | $M = \min\left(S_{ice}, \frac{\chi}{H_M}\right)$                                                                                                                                                                                                                                                                                                                                                                                                                                                                                                                                                                                                                                                                                                                                                                  |
| CWatM      | $M = C_m \times C_{m,season} \times (1 + 0.01 \times P_{ra}) \times (\theta_{SG_i} - \theta_M) \times \Delta t - E_{sn}$ ; See [45]<br>for 10 elevation zones per grid.<br>$M_{glacier} = C_{mglacier} \times C_{m,seasonglacier} \times (\theta_{SG_i} - \theta_M)$<br>for 3 elevation zones per grid                                                                                                                                                                                                                                                                                                                                                                                                                                                                                                            |
| DBH        | $M = \theta_{freeze} \times (H_{tot} + \delta H_{tot}) - (\theta_{so} \times H_{tot} + \theta \times \delta H_{tot})$                                                                                                                                                                                                                                                                                                                                                                                                                                                                                                                                                                                                                                                                                             |
| H08        | $M = \frac{\chi_f}{H_{M,ice}}$ with $H_{M,ice} = 0.333 \times 10^6$                                                                                                                                                                                                                                                                                                                                                                                                                                                                                                                                                                                                                                                                                                                                               |
| JULES-W1   | $M = \frac{\min\left(S_{sn}, \frac{\theta - \theta_M}{H_M \times H_{soTL}}\right)}{\Delta t}$ for $\theta > \theta_M$ ; $M \times \Delta t \leq S_{sn}$ ; $H_M \times M \times \Delta t \leq \frac{\theta - \theta_M}{H_{soTL}}$ for details see [22]                                                                                                                                                                                                                                                                                                                                                                                                                                                                                                                                                             |
| LPJmL      | $M = \begin{cases} \frac{H}{0.3 \times 9}, & \theta > 273.15 \\ R_{sn} = P_{th}, & S_{sn} > 20.000 \text{ (mm)} \end{cases}$                                                                                                                                                                                                                                                                                                                                                                                                                                                                                                                                                                                                                                                                                      |
| Mac-PDM.20 | $M = \begin{cases} \min(S_{sn}, C_m \times (\theta - 273.15)), & \theta > 273.15 \\ 0, & \theta \leq 273.15 \end{cases}$                                                                                                                                                                                                                                                                                                                                                                                                                                                                                                                                                                                                                                                                                          |
| MATSIRO    | $M = \sum_{i=1}^N M_t$<br>for $k = 1, N$<br>for $k = 1$ (starting from top layer)<br>for $S_{sn(1)} \neq 0$ and $\theta_M < \theta_{sn1}$<br>$H_{sn} = H_{sn2} - H_{sn1} - \frac{c_{ice} \times S_{sn1} \times (\theta_M - \theta_{sn1})}{\Delta t}$<br>$M = \min\left(\frac{S_{sn1}}{\Delta t}, \frac{H_{sn}}{H_M}\right)$<br>$M_1 = f_{sn} \times M$<br>$H_{sn} = H_{sn} - (M \times H_M)$<br>for $2 \leq k \leq N$<br>$\theta_{sn,k} = \theta_{sn,k} + \frac{H_{sn}}{c_{ice} \times S_{sn,k}} \times \Delta t$<br>$H_{sn} = \max\left(\frac{c_{ice} \times S_{sn,k} \times (\theta_{sn,k} - \theta_M)}{\Delta t}, 0\right)$<br>$M = \min\left(\frac{S_{sn,i}}{\Delta t}, \frac{H_{sn}}{H_M}\right)$<br>$M_i = f_{sn} \times M$<br>$M = \min(S_{sn}, (\theta - \theta_M) \times C_m)$ where $\theta > \theta_M$ |
| mHM        | $M_{pot} = \max\left(0, \left(\sin\left(\pi \times \frac{t_{day}}{t_{year}}\right) \times 8.3 + 0.7\right) \times (\theta - \theta_{freeze})\right)$                                                                                                                                                                                                                                                                                                                                                                                                                                                                                                                                                                                                                                                              |
| MPI-HM     | $M = M_{pot} + \max\left(0, S_{sn,l} - 0.06 \times S_{sn}\right)$<br>$M_i = S_{sn,i} - \frac{1.9 \times 10^6 \times \frac{\rho_{sn,i}}{\rho_{ice}} \times \zeta_{sn} \times (\theta_{sn,i} - \theta_f) - H_{sn,i}}{H_{M,ice}}$ . See [53]                                                                                                                                                                                                                                                                                                                                                                                                                                                                                                                                                                         |
| ORCHIDEE   | $M = \min(S_{sn}, (\theta - \theta_M) \times C_m)$ where $\theta > \theta_M$                                                                                                                                                                                                                                                                                                                                                                                                                                                                                                                                                                                                                                                                                                                                      |
| PCR-GLOBWB | $\chi_{to} = (NR + H_{se} + H_l + \chi_{rs}) \times \Delta t$ . See [2]                                                                                                                                                                                                                                                                                                                                                                                                                                                                                                                                                                                                                                                                                                                                           |
| VIC        | $M = \begin{cases} C_m \times (\theta_{SG_i} - 273.15), & \theta_{SG_i} > 273.15, S_{sn,SG_i} > 0 \text{ mm} \\ 0, & \text{other} \end{cases}$<br>$C_m = \text{landcover specific degree-day factor, see [34]}$                                                                                                                                                                                                                                                                                                                                                                                                                                                                                                                                                                                                   |
| WaterGAP2  | $M = \begin{cases} \min(S_{sn}, C_m \times (\theta - 273.15)), & \theta > 273.15 \\ 0, & \theta \leq 273.15 \end{cases}$                                                                                                                                                                                                                                                                                                                                                                                                                                                                                                                                                                                                                                                                                          |
| WAYS       | $M = \begin{cases} \min(S_{sn}, C_m \times (\theta - 273.15)), & \theta > 273.15 \\ 0, & \theta \leq 273.15 \end{cases}$                                                                                                                                                                                                                                                                                                                                                                                                                                                                                                                                                                                                                                                                                          |

**Table S13.** Frozen soil ( $F_{so}$ )

| Model      | Equation                                                                                                                                                                                                                                                                                                                                                                                                                                                                                                                                                                                                                                                                                                                                                                                                   |
|------------|------------------------------------------------------------------------------------------------------------------------------------------------------------------------------------------------------------------------------------------------------------------------------------------------------------------------------------------------------------------------------------------------------------------------------------------------------------------------------------------------------------------------------------------------------------------------------------------------------------------------------------------------------------------------------------------------------------------------------------------------------------------------------------------------------------|
| CLM4.5     | $\frac{H_{so,i} \times C_{so,i}}{\Delta t} \times (\theta_{so,i}^{n+1} - \theta_{so,i}^n) = Hatm^n + \frac{\delta Hatm}{\delta \theta_{so,i}} \times (\theta_{so,i}^{n+1} - \theta_{so,i}^n) - \alpha \times \frac{k_{th} \times (\theta_{so,i}^n - \theta_{so,i+1}^n)}{d_{n,i+1} - d_{n,i}} - (1 - \alpha) \times \frac{k_{th} \times (\theta_{so,i}^{n+1} - \theta_{so,i+1}^{n+1})}{d_{n,i+1} - d_{n,i}}$ <p>Where the superscripts n and n + 1 indicate values at the beginning and end of the time step, respectively. See [37]</p>                                                                                                                                                                                                                                                                    |
| CLM5.0     | $\frac{H_{so,i} \times C_{so,i}}{\Delta t} \times (\theta_{so,i}^{n+1} - \theta_{so,i}^n) = Hatm^n + \frac{\delta Hatm}{\delta \theta_{so,i}} \times (\theta_{so,i}^{n+1} - \theta_{so,i}^n) - \alpha \times \frac{k_{th} \times (\theta_{so,i}^n - \theta_{so,i+1}^n)}{d_{n,i+1} - d_{n,i}} - (1 - \alpha) \times \frac{k_{th} \times (\theta_{so,i}^{n+1} - \theta_{so,i+1}^{n+1})}{d_{n,i+1} - d_{n,i}}$ <p>See Oleson et al. [37]</p>                                                                                                                                                                                                                                                                                                                                                                  |
| CWatM      | $\frac{\delta F_{so}}{\delta t} = -(1 - \nu) \times F - \theta_{SG_i} \times exp(-0.04 \times \nu \times \frac{d_{sn}}{SWE}); F_t = F_{t-1} + \frac{\delta F_{so}}{\delta t} \times \Delta t.$ <p>See [32]</p>                                                                                                                                                                                                                                                                                                                                                                                                                                                                                                                                                                                             |
| DBH        | not represented                                                                                                                                                                                                                                                                                                                                                                                                                                                                                                                                                                                                                                                                                                                                                                                            |
| H08        | not represented. When a surface is snow-covered, soil moisture does not change through precipitation or evaporation.                                                                                                                                                                                                                                                                                                                                                                                                                                                                                                                                                                                                                                                                                       |
| JULES-W1   | not represented                                                                                                                                                                                                                                                                                                                                                                                                                                                                                                                                                                                                                                                                                                                                                                                            |
| LPJ-ML     | not represented                                                                                                                                                                                                                                                                                                                                                                                                                                                                                                                                                                                                                                                                                                                                                                                            |
| Mac-PDM.20 | not represented                                                                                                                                                                                                                                                                                                                                                                                                                                                                                                                                                                                                                                                                                                                                                                                            |
| MATSIRO    | $Q_{in,so} = k \times \left( \frac{\delta \Psi}{\delta z} - 1 \right)$ $k = C_{so,F} \times k_{sat} \times \left( \frac{S_{so,uF}}{\phi_{so} - S_{so,F}} \right)^{2 \times \beta + 3}$ $\Psi = \Psi_{sat} \times \left( \frac{S_{so,uF}}{\phi_{so} - S_{so,F}} \right)^{-\beta}$ $C_{so,F} = \left( 1 - \frac{S_{so,F}}{S_{so,uF} + S_{so,F}} \right)^\alpha.$ <p>See [44]</p> <p><math>\alpha</math> is unity. <math>k</math> and <math>\Psi</math> are calculated after the formula in Clapp and Hornberger [10]. For more detail, see [49].</p>                                                                                                                                                                                                                                                         |
| mHM        | not represented                                                                                                                                                                                                                                                                                                                                                                                                                                                                                                                                                                                                                                                                                                                                                                                            |
| MPI-HM     | not represented                                                                                                                                                                                                                                                                                                                                                                                                                                                                                                                                                                                                                                                                                                                                                                                            |
| ORCHIDEE   | not represented                                                                                                                                                                                                                                                                                                                                                                                                                                                                                                                                                                                                                                                                                                                                                                                            |
| PCR-GLOBWB | not represented                                                                                                                                                                                                                                                                                                                                                                                                                                                                                                                                                                                                                                                                                                                                                                                            |
| VIC        | <p>The motivation for development of the frozen soil algorithm is to represent the effects of seasonally frozen ground on surface hydrologic response and the surface energy balance, at a level of complexity consistent with the previously developed VIC algorithms. In this spirit, the VIC soil moisture transport scheme was retained, and the thermal and moisture fluxes are solved separately. At each time step, thermal fluxes through the soil column are solved prior to the prediction of soil layer ice content. Subsequently, moisture fluxes are computed using the updated ice contents. Finally, soil thermal properties for the next time step are estimated from the revised distribution of soil moisture and ice. See for details: Section 2.1 in Cherkauer and Lettenmaier [8]</p> |
| WaterGAP2  | not represented                                                                                                                                                                                                                                                                                                                                                                                                                                                                                                                                                                                                                                                                                                                                                                                            |
| WAYS       | not represented                                                                                                                                                                                                                                                                                                                                                                                                                                                                                                                                                                                                                                                                                                                                                                                            |



**Table S14.** Soil storage ( $S_{so}$ )

| Model       | Equation                                                                                                                                                                                                                                                                                                                                                                                                                                                                                                          | Water Flux                              |                                                  |
|-------------|-------------------------------------------------------------------------------------------------------------------------------------------------------------------------------------------------------------------------------------------------------------------------------------------------------------------------------------------------------------------------------------------------------------------------------------------------------------------------------------------------------------------|-----------------------------------------|--------------------------------------------------|
|             |                                                                                                                                                                                                                                                                                                                                                                                                                                                                                                                   | Inflows                                 | Outflows                                         |
| CLM4.5      | $\frac{\delta d_{so} \delta S_{so,l,i}}{\delta t} = Q_i - Q_{i-1} - T_i$                                                                                                                                                                                                                                                                                                                                                                                                                                          | $Q_i$                                   | $Q_{i-1} T_i$                                    |
| CLM5.0      | $\frac{\delta d_{so} \delta S_{so,l,i}}{\delta t} = Q_i - Q_{i-1} - T_i$                                                                                                                                                                                                                                                                                                                                                                                                                                          | $Q_i$                                   | $Q_{i-1} T_i$                                    |
| CWatM       | $\frac{\delta S_{so}}{\delta t} = R_{cr} + R_{in} - R_{gwr} - R_{if} - E_{so} - T$                                                                                                                                                                                                                                                                                                                                                                                                                                | $R_{cr} R_{in}$                         | $E_{so} R_{gwr} R_{if}$<br>$T$                   |
| DBH         | $\frac{\delta S_{so,i}}{\delta t} = \begin{cases} R_{in,i} - E_{so,i} - R_{gwr,i}, & i = 0 \text{ (top layer)} \\ R_{gwr,i-1} - R_{gwr,i} - T_i, & i > 0 \end{cases}$                                                                                                                                                                                                                                                                                                                                             | $R_{in,i} R_{gwr,i-1}$                  | $E_{so,i} R_{gwr,i} T_i$                         |
| H08         | $\frac{\delta S_{so,i}}{\delta t} = M + P_{th} - E_{so} - R_{in}$                                                                                                                                                                                                                                                                                                                                                                                                                                                 | $M P_{th}$                              | $E_{so} R_{in}$                                  |
| JULES-W1    | $\frac{\delta S_{so}}{\delta t} = M + P_{th} - E_{so} - R_{if} - R_{su}$                                                                                                                                                                                                                                                                                                                                                                                                                                          | $M P_{th}$                              | $E_{so} R_{if} R_{su}$                           |
| LPJmL       | $\frac{\delta S_{so}}{\delta t} = (R_{if} + R_{in}) - R_{gwr} - R_{if} - E_{so} - T$                                                                                                                                                                                                                                                                                                                                                                                                                              | $R_{if} R_{in}$                         | $E_{so} R_{gwr} T$                               |
| Mac-PDM.20M | $\frac{\delta S_{so}}{\delta t} = M + P_{tot} - E_{so} - R_{su}$                                                                                                                                                                                                                                                                                                                                                                                                                                                  | $P_{tot} M$                             | $E_{so} R_{su}$                                  |
| MATSIRO     | $\frac{\delta S_{so}}{\delta t} = \sum_{n=1,13} [(S_{so,F_i} + S_{so,uF_i}) \times d_{so}]$                                                                                                                                                                                                                                                                                                                                                                                                                       |                                         |                                                  |
| mHM         | $\frac{\delta S_{so,i}}{\delta t} = \begin{cases} R_{in,i} - ET_{so,i} - R_{sof,i}, & i = 0 \text{ (top soil layer)} \\ R_{sof,i-1} - ET_{so,i} - R_{sof,i}, & i > 0 \end{cases}$                                                                                                                                                                                                                                                                                                                                 | $R_{in,i}$                              | $ET_{so,i} R_{sof,i}$                            |
| MPI-HM      | $\frac{\delta S_{so}}{\delta t} = R_{in} - R_{pe} - E_{so} - T$                                                                                                                                                                                                                                                                                                                                                                                                                                                   | $R_{in}$                                | $E_{so} R_{pe} T$                                |
| ORCHIDEE    | $\frac{\delta S_{so}}{\delta t} = R_{in} + R_{in,r} - R_{su} - E_{so}$                                                                                                                                                                                                                                                                                                                                                                                                                                            | $R_{in} R_{in,r}$                       | $E_{so} R_{su}$                                  |
| PCR-GLOBWB  | $\frac{\delta S_{so}}{\delta t} = R_{in} - R_{gwr} - R_{if} - E_{so} - T$                                                                                                                                                                                                                                                                                                                                                                                                                                         | $R_{in}$                                | $E_{so} R_{gwr} R_{if}$<br>$T$                   |
| VIC         | $\frac{\delta S_{so}}{\delta t} = \frac{\delta}{\delta d_{so}} \times \left( D_w \times \frac{\delta S_{so}}{\delta d_{so}} \right) + \frac{\delta k}{\delta d_{so}}$<br>for the top two soil layers:<br>$\frac{\delta S_{so}}{\delta t} \times d_{so,i} = R_{in} - E_{so} - T - k \times d_{so,i} - D_w \times d_{so,i}$<br>for details see Gao et al. [20]; Liang et al. [29]<br>for lower soil layer:<br>$\frac{\delta S_{so,3}}{\delta t} \times (d_{so,3} - d_{so,2}) = k_{d_{so,2}} + D_{w,2} - T - R_{gw}$ | $D_w d_{so,1} k_{d_{so,1}}$<br>$R_{in}$ | $k_{d_{so,1}} D_w d_{so,2}$<br>$E_{so} T R_{gw}$ |
| WaterGAP2   | $\frac{\delta S_{so}}{\delta t} = R_{in} - R_{tot} - E_{so}$                                                                                                                                                                                                                                                                                                                                                                                                                                                      | $R_{in}$                                | $R_{tot} E_{so}$                                 |
| WAYS        | $\frac{\delta S_{so}}{\delta t} = M + P_{th} - E_{so} - R_{tot}$                                                                                                                                                                                                                                                                                                                                                                                                                                                  | $M P_{th}$                              | $E_{so} R_{tot}$                                 |

**Table S15.** Total runoff in ISIMIP2b ( $R_{tot, ISIMIP2b}$ )

| Model      | Equation                           |
|------------|------------------------------------|
| CLM4.5     | $R_{tot, ISIMIP2b} = R_s + R_{sb}$ |
| CLM5.0     | $R_{tot, ISIMIP2b} = R_s + R_{sb}$ |
| CWatM      | $R_{tot, ISIMIP2b} = R_s + R_{sb}$ |
| DBH        | $R_{tot, ISIMIP2b} = R_s + R_{sb}$ |
| H08        | $R_{tot, ISIMIP2b} = R_s + R_{sb}$ |
| JULES-W1   | $R_{tot, ISIMIP2b} = R_s + R_{sb}$ |
| LPJmL      | $R_{tot, ISIMIP2b} = R_s + R_{sb}$ |
| Mac-PDM.20 | $R_{tot, ISIMIP2b} = R_s + R_{sb}$ |
| MATSIRO    | $R_{tot, ISIMIP2b} = R_s + R_{sb}$ |
| mHM        | $R_{tot, ISIMIP2b} = R_s + R_{sb}$ |
| MPI-HM     | $R_{tot, ISIMIP2b} = R_s + R_{sb}$ |
| ORCHIDEE   | $R_{tot, ISIMIP2b} = R_s + R_{sb}$ |
| PCR-GLOBWB | $R_{tot, ISIMIP2b} = R_s + R_{sb}$ |
| VIC        | $R_{tot, ISIMIP2b} = R_s + R_{sb}$ |
| WaterGAP2  | $R_{tot, ISIMIP2b} = R_s + R_{sb}$ |
| WAYS       | $R_{tot, ISIMIP2b} = R_s + R_{sb}$ |

**Table S16.** Surface runoff in ISIMIP2b ( $R_s$ )

| Model      | Equation       |
|------------|----------------|
| CLM4.5     | $R_s = R_{su}$ |
| CLM5.0     | $R_s = R_{su}$ |
| CWatM      | $R_s = R_{su}$ |
| DBH        | $R_s = R_{su}$ |
| H08        | $R_s = R_{su}$ |
| JULES-W1   | $R_s = R_{su}$ |
| LPJmL      | $R_s = R_{su}$ |
| Mac-PDM.20 | $R_s = R_{su}$ |
| MATSIRO    | $R_s = R_{su}$ |
| mHM        | $R_s = R_{su}$ |
| MPI-HM     | $R_s = R_{su}$ |
| ORCHIDEE   | $R_s = R_{su}$ |
| PCR-GLOBWB | $R_s = R_{su}$ |
| VIC        | $R_s = R_{su}$ |
| WaterGAP2  | $R_s = R_{su}$ |
| WAYS       | $R_s = R_{su}$ |

**Table S17.** Subsurface runoff in ISIMIP2b ( $R_{sb}$ )

| Model      | Equation                                                                                                                                                                                                                                                                                                                                                                                                                                                                                                                                                                         |
|------------|----------------------------------------------------------------------------------------------------------------------------------------------------------------------------------------------------------------------------------------------------------------------------------------------------------------------------------------------------------------------------------------------------------------------------------------------------------------------------------------------------------------------------------------------------------------------------------|
| CLM4.5     | $R_{sb} = R_{gw}$                                                                                                                                                                                                                                                                                                                                                                                                                                                                                                                                                                |
| CLM5.0     | $R_{sb} = R_{gw}$                                                                                                                                                                                                                                                                                                                                                                                                                                                                                                                                                                |
| CWatM      | $R_{sb} = R_{if} + gw$                                                                                                                                                                                                                                                                                                                                                                                                                                                                                                                                                           |
| DBH        | not represented                                                                                                                                                                                                                                                                                                                                                                                                                                                                                                                                                                  |
| H08        | $R_{sb} = R_{gw}$                                                                                                                                                                                                                                                                                                                                                                                                                                                                                                                                                                |
| JULES-W1   | $R_{sb} = R_{if}$                                                                                                                                                                                                                                                                                                                                                                                                                                                                                                                                                                |
| LPJmL      | $R_{sb} = R_{if}$                                                                                                                                                                                                                                                                                                                                                                                                                                                                                                                                                                |
| Mac-PDM.20 | $R_{sb} = R_{gw}$                                                                                                                                                                                                                                                                                                                                                                                                                                                                                                                                                                |
| MATSIRO    | $R_{sb} = R_{gw}$                                                                                                                                                                                                                                                                                                                                                                                                                                                                                                                                                                |
| mHM        | $R_{sb} = R_{if,fast} + R_{if,slow} + R_{gw}$                                                                                                                                                                                                                                                                                                                                                                                                                                                                                                                                    |
| MPI-HM     | $R_{sb} = R_{gwr}$                                                                                                                                                                                                                                                                                                                                                                                                                                                                                                                                                               |
| ORCHIDEE   | $R_{sb} = R_{gw}$                                                                                                                                                                                                                                                                                                                                                                                                                                                                                                                                                                |
| PCR-GLOBWB | $R_{sb} = R_{if}$                                                                                                                                                                                                                                                                                                                                                                                                                                                                                                                                                                |
| VIC        | $R_{sb} = \begin{cases} \frac{R_{if,max} \times f_{R_{if,max}}}{f_{S_{so,max}} \times S_{so,max,3L}} \times S_{so,3L}, & 0 \leq S_{so,3L} \leq f_{S_{so,max}} \times S_{so,max,3L} \\ \frac{R_{if,max} \times f_{R_{if,max}}}{f_{S_{so,max}} \times S_{so,max,3L}} \times S_{so,3L} + \left( R_{if,max} - \frac{R_{if,max} \times f_{R_{if,max}}}{f_{S_{so,max}}} \right) \times \left( S_{so,3L} - \frac{f_{S_{so,max}} \times S_{so,max,3L}}{S_{so,max,3L} - f_{S_{so,max}} \times S_{so,max,3L}} \right)^2, & S_{so,3L} \geq f_{S_{so,max}} \times S_{so,max,3L} \end{cases}$ |
| WaterGAP2  | $R_{sb} = R_{gw}$                                                                                                                                                                                                                                                                                                                                                                                                                                                                                                                                                                |
| WAYS       | $R_{sb} = R_{if} + R_{gw}$                                                                                                                                                                                                                                                                                                                                                                                                                                                                                                                                                       |

**Table S18.** Total runoff from land ( $R_{tot}$ )

| Model      | Equation                                                                                                                                                                                                                                                                                                                  |
|------------|---------------------------------------------------------------------------------------------------------------------------------------------------------------------------------------------------------------------------------------------------------------------------------------------------------------------------|
| CLM4.5     | not represented                                                                                                                                                                                                                                                                                                           |
| CLM5.0     | not represented                                                                                                                                                                                                                                                                                                           |
| CWatM      | not represented                                                                                                                                                                                                                                                                                                           |
| DBH        | not represented                                                                                                                                                                                                                                                                                                           |
| H08        | not represented                                                                                                                                                                                                                                                                                                           |
| JULES-W1   | not represented                                                                                                                                                                                                                                                                                                           |
| LPJmL      | not represented                                                                                                                                                                                                                                                                                                           |
| Mac-PDM.20 | not represented                                                                                                                                                                                                                                                                                                           |
| MATSIRO    | not represented                                                                                                                                                                                                                                                                                                           |
| mHM        | $R_{tot} = R_{su} + R_{if,fast} + R_{if,slow} + R_{gw}$                                                                                                                                                                                                                                                                   |
| MPI-HM     | not represented                                                                                                                                                                                                                                                                                                           |
| ORCHIDEE   | not represented                                                                                                                                                                                                                                                                                                           |
| PCR-GLOBWB | not represented                                                                                                                                                                                                                                                                                                           |
| VIC        | not represented                                                                                                                                                                                                                                                                                                           |
| WaterGAP2  | $R_{tot} = R_{in} \times \left( \frac{S_{so}}{S_{so,max}} \right)^\gamma + R_{bu} + R_{sat}$ with $S_{so,max} = S_{so,TL} \times d_{so,root}$ and $R_{bu} = 0.5 \times R_{in} \times f_{bu}$ , $R_{in}$ is reduced by $R_{bu}$ before calculating $R_{tot}$ , $\gamma$ is the calibration parameter according to [3, 34]. |
| WAYS       | $R_{tot} = \left( 1 - \left( 1 - \frac{S_{rz}}{(1 + \beta) \times S_{rz,max}} \right) \right)^\beta \times R_{in}$                                                                                                                                                                                                        |

**Table S19.** Runoff concentration in a grid cell ( $R_G^n$ )

| Model      | Equation                                                                                                                                                                                                                                                           |
|------------|--------------------------------------------------------------------------------------------------------------------------------------------------------------------------------------------------------------------------------------------------------------------|
| CLM4.5     | not represented                                                                                                                                                                                                                                                    |
| CLM5.0     | not represented                                                                                                                                                                                                                                                    |
| CWatM      | $R_G^n = \sum_{LC} \times \sum_{f_R} \times \sum_i^{max} \times tri_x \times R_{su_{LC,R}} \times (t - i + 1); \text{ for "i" runs from 1 to maximum number of days.}$ $tri_x = \int_{i-1}^i \times \frac{2}{max} -  u - \frac{max}{2}  \times \frac{4}{max^2} du$ |
| DBH        | not represented                                                                                                                                                                                                                                                    |
| H08        | not represented                                                                                                                                                                                                                                                    |
| JULES-W1   | not represented                                                                                                                                                                                                                                                    |
| LPJmL      | not represented                                                                                                                                                                                                                                                    |
| Mac-PDM.20 | not represented                                                                                                                                                                                                                                                    |
| MATSIRO    | not represented                                                                                                                                                                                                                                                    |
| mHM        | not represented                                                                                                                                                                                                                                                    |
| MPI-HM     | $R_G = \frac{S_{rv}}{\kappa_{ol}}$                                                                                                                                                                                                                                 |
| ORCHIDEE   | not represented                                                                                                                                                                                                                                                    |
| PCR-GLOBWB | not represented                                                                                                                                                                                                                                                    |
| VIC        | not represented                                                                                                                                                                                                                                                    |
| WaterGAP2  | not represented                                                                                                                                                                                                                                                    |
| WAYS       | not represented                                                                                                                                                                                                                                                    |

**Table S20.** Surface runoff ( $R_{su}$ )

| Model      | Equation                                                                                                                                                                                                                                                                                                                                                                                                                                                                                                                                                                                                                                                                                                                                                                                                                                                                                                                |
|------------|-------------------------------------------------------------------------------------------------------------------------------------------------------------------------------------------------------------------------------------------------------------------------------------------------------------------------------------------------------------------------------------------------------------------------------------------------------------------------------------------------------------------------------------------------------------------------------------------------------------------------------------------------------------------------------------------------------------------------------------------------------------------------------------------------------------------------------------------------------------------------------------------------------------------------|
| CLM4.5     | $R_{su,l} = R_{gl,we,la} + R_{su,l} + R_{if}$                                                                                                                                                                                                                                                                                                                                                                                                                                                                                                                                                                                                                                                                                                                                                                                                                                                                           |
| CLM5.0     | $R_{su,ice} = R_{snwcp,ice}$<br>$R_{su,l} = R_{gl,we,la} + R_{su,l} + R_{if}$<br>$R_{su,ice} = R_{snwcp,ice}$                                                                                                                                                                                                                                                                                                                                                                                                                                                                                                                                                                                                                                                                                                                                                                                                           |
| CWatM      | $R_{su} = R_{ho} + R_{if} + R_{of}$                                                                                                                                                                                                                                                                                                                                                                                                                                                                                                                                                                                                                                                                                                                                                                                                                                                                                     |
| DBH        | $R_{su} = R_{ho} + R_{sat}$                                                                                                                                                                                                                                                                                                                                                                                                                                                                                                                                                                                                                                                                                                                                                                                                                                                                                             |
| H08        | $R_{su} = \begin{cases} \frac{(S_{so,tot} - d_{so} \times 1000 \times (S_{so,FC} - S_{so,WP}))}{t}, & \frac{S_{so,tot}}{d_{so} \times 1000 \times (S_{so,FC} - S_{so,WP})} \geq 1 \\ 0, & \frac{S_{so,tot}}{d_{so} \times 1000 \times (S_{so,FC} - S_{so,WP})} < 1 \end{cases}$                                                                                                                                                                                                                                                                                                                                                                                                                                                                                                                                                                                                                                         |
| JULES-W1   | $R_{su} = \begin{cases} \left( P_{ra} \times \frac{S_{ca}}{S_{ca,max}} \times \exp\left(-\frac{f_{pc,G} \times S_{ca,max} \times R_{in}}{P_{ra} \times S_{ca}}\right) \right) + \left( P_{ra} \times \left(1 - \frac{S_{ca}}{S_{ca,max}}\right) \times \exp\left(-\frac{f_{pc,G} \times S_{ca,max}}{P_{ra} \times \Delta t}\right) \right) \\ \text{for } R_{in} \times \delta P_{th} \leq S_{ca} \\ P_{ra} \times \exp\left(-\frac{f_{pc,G}(R_{in} \times \delta P_{th} + S_{ca,max} - S_{ca})}{P_{ra} \times \Delta t}\right) \\ \text{for } R_{in} \times \delta P_{th} > S_{ca} \end{cases}$                                                                                                                                                                                                                                                                                                                        |
| LPJmL      | $R_{su} = P_{tot} - R_{in,TL}$                                                                                                                                                                                                                                                                                                                                                                                                                                                                                                                                                                                                                                                                                                                                                                                                                                                                                          |
| Mac-PDM.20 | $R_{su} = \begin{cases} P_{ra} - AET, & S_{so,FC} < S_{so,tot} \\ 0, & S_{so,tot} \leq S_{so,FC} \end{cases}$<br>Runoff is generated from excess rainfall (rainfall minus evaporation) when the soil water content exceeds the capacity of the soil (field capacity).                                                                                                                                                                                                                                                                                                                                                                                                                                                                                                                                                                                                                                                   |
| MATSIRO    | $R_{su} = R_{ho} + R_{sat} + R_{of}$                                                                                                                                                                                                                                                                                                                                                                                                                                                                                                                                                                                                                                                                                                                                                                                                                                                                                    |
| mHM        | $R_{su} = f_{bu} \times R_{in,i} - \frac{S_{pon}}{S_{pon,max}} (PET_{ows} - E_{ca})$<br>occurs only on the fraction of the impervious/sealed land cover class, at the top soil layer: $i = 0$                                                                                                                                                                                                                                                                                                                                                                                                                                                                                                                                                                                                                                                                                                                           |
| MPI-HM     | $R_{su} = 1 - f_{we} \times \begin{cases} P_{ra} + M + (S_{so} - S_{so,max}), & S_{so,SG,max} \leq S_{so,SG} + P_{ra} + M \\ P_{ra} + M - \max(0, S_{so,SG,min} - S_{so}) - R_0, & S_{so,SG,min} \leq S_{so,SG} + P_{ra} + M \leq S_{so,SG} + P_{ra} + M \\ 0, & S_{so,SG} + P_{ra} + M \leq S_{so,SG,min} \end{cases}$<br>$R_0 = \frac{S_{so,SG,max} - S_{so,SG,min}}{1 + \sigma} \times (R_1 - R_2)$<br>$R_1 = \min\left(1, \left(\frac{S_{so,SG,max} - S_{so,SG}}{S_{so,SG,max} - S_{so,SG,min}}\right)^{1+\sigma}\right)$<br>$R_2 = \max\left(0, \frac{S_{so,SG,max} - S_{so,SG} - P_{ra} - M}{S_{so,SG,max} - S_{so,SG,min}}\right)^{1+\sigma}$<br>$S_{so,SG} = \begin{cases} S_{so,SG,max} - (S_{so,SG,max} - S_{so,SG,min}) \times \left(1 - \frac{S_{so} - S_{so,SG,min}}{S_{so,max} - S_{so,SG,min}}\right)^{\frac{1}{1+\sigma}}, & S_{so} > S_{so,SG,min} \\ S_{so}, & S_{so} \leq S_{so,SG,min} \end{cases}$ |
| ORCHIDEE   | $R_{su} = P_{th} - R_{in}$                                                                                                                                                                                                                                                                                                                                                                                                                                                                                                                                                                                                                                                                                                                                                                                                                                                                                              |
| PCR-GLOBWB | $R_{su} = R_{ho} + R_{if}$                                                                                                                                                                                                                                                                                                                                                                                                                                                                                                                                                                                                                                                                                                                                                                                                                                                                                              |
| VIC        | Since the top thin soil layer has a very small water holding capacity, the direct runoff (surface runoff) within each time step is calculated for the entire upper layer (layer 1 and layer 2) as (Liang et al. [29]; Gao et al. [20]):                                                                                                                                                                                                                                                                                                                                                                                                                                                                                                                                                                                                                                                                                 |
| WaterGAP2  | $R_{su} = \begin{cases} P_{tot} - d_{so2} \times (\phi_{so} - S_{so,T2L}) + d_{so2} \times \phi_{so} \times \left(1 - \frac{R_{in,0} + P_{tot}}{R_{in,max}}\right)^{1+\Pi R_{in}}, & P_{tot} + R_{in,0} \leq R_{in,max} \\ P_{tot} - d_{so2} \times (\phi_{so} - S_{so,T2L}), & P_{tot} + R_{in,0} \geq R_{in,max} \end{cases}$                                                                                                                                                                                                                                                                                                                                                                                                                                                                                                                                                                                         |
| WAYS       | $R_{su} = R_{tot} - R_{gwr}$<br>$R_{su} = R_{tot} - R_{gwr}$                                                                                                                                                                                                                                                                                                                                                                                                                                                                                                                                                                                                                                                                                                                                                                                                                                                            |

**Table S21.** Hortonian overland flow ( $R_{ho}$ )

| Model      | Equation                                                                                  |
|------------|-------------------------------------------------------------------------------------------|
| CLM4.5     | $R_{ho} = \max(R_{in} - (1 - f_{h2o}) R_{in,max}, 0)$                                     |
| CLM5.0     | $R_{ho} = \max(R_{in} - (1 - f_{h2o}) R_{in,max}, 0)$                                     |
| CWatM      | $R_{ho} = M + P_{th} - Q_{pf} - R_{in}$<br>Preferential flow, that bypass the soil matrix |
|            | $Q_{pf} = (P_{th} + M) \times \left( \frac{S_{so,rel}}{S_{so,sat}} \right)^\beta$         |
| DBH        | $R_{ho} = \int_0^{f_{C,unsat}} P_{th} \times P_{conv} - k$                                |
| H08        | not represented                                                                           |
| JULES-W1   | not represented                                                                           |
| LPJmL      | it is taken into account when surface runoff is computed, but not separately considered.  |
| Mac-PDM.20 | not represented                                                                           |
| MATSIRO    | $R_{ho} = B_{stormy} \times R_{ho,stormy} + (1 - B_{calm}) \times R_{ho,calm}$            |
| mHM        | not represented                                                                           |
| MPI-HM     | not represented                                                                           |
| ORCHIDEE   | not represented                                                                           |
| PCR-GLOBWB | $R_{ho} = 1 - \frac{S_{so,sat} - S_{so,tot}}{S_{so,tot} - S_{so,WP}} \times P_{tot}$      |
| VIC        | $R_{ho} = \max(R_{in} - (1 - f_{h2o}) \times R_{in,max}, 0)$                              |
| WaterGAP2  | not represented                                                                           |
| WAYS       | not represented                                                                           |



**Table S22.** Saturation excess overland flow ( $R_{sat}$ )

| Model      | Equation                                                                                                                                                                                                                                                                                                                    |
|------------|-----------------------------------------------------------------------------------------------------------------------------------------------------------------------------------------------------------------------------------------------------------------------------------------------------------------------------|
| CLM4.5     | not represented                                                                                                                                                                                                                                                                                                             |
| CLM5.0     | not represented                                                                                                                                                                                                                                                                                                             |
| CWatM      | not represented                                                                                                                                                                                                                                                                                                             |
| DBH        | $R_{sat} = \int_0^{f_{G,sat}} P_{th}$                                                                                                                                                                                                                                                                                       |
| H08        | not represented                                                                                                                                                                                                                                                                                                             |
| JULES-W1   | any saturation excess is moved to the soil layer below (the move of excess water to upper soil layers due to saturation is restricted. The excess saturation water is forced down to lower layers, and if the bottom soil layer becomes super-saturated, then the excess water is added to the interflow (Best et al. [5]). |
| LPJmL      | $R_{sat} = R_{su}$                                                                                                                                                                                                                                                                                                          |
| Mac-PDM.20 | $R_{sat} = R_{su}$                                                                                                                                                                                                                                                                                                          |
| MATSIRO    | $R_{sat} = f_{G,sat} \times f_{ri,sat} \times P_{th}$                                                                                                                                                                                                                                                                       |
| mHM        | not represented                                                                                                                                                                                                                                                                                                             |
| MPI-HM     | implicitly included in surface runoff computation                                                                                                                                                                                                                                                                           |
| ORCHIDEE   | not represented                                                                                                                                                                                                                                                                                                             |
| PCR-GLOBWB | not represented                                                                                                                                                                                                                                                                                                             |
| VIC        | same as Table S20.                                                                                                                                                                                                                                                                                                          |
| WaterGAP2  | $R_{sat} = \begin{cases} S_{so} - S_{so,max}, & S_{so} > S_{so,max} \\ 0, & \text{other cases} \end{cases}$<br>with $S_{so,max} = d_{so,root} \times S_{so,TL}$                                                                                                                                                             |
| WAYS       | $R_{sat} = \frac{\max(0, S_f - S_{ftr})}{K_{ff}}$<br>The Overflow of the uppermost layer is only active when the storage of the fast response reservoir exceeds the specified threshold $S_{ftr}$                                                                                                                           |

**Table S23.** Transpiration ( $T$ )

| Model      | Equation                                                                                                                                                                                                                                                                                                                  |
|------------|---------------------------------------------------------------------------------------------------------------------------------------------------------------------------------------------------------------------------------------------------------------------------------------------------------------------------|
| CLM4.5     | $T = -r_{ca,dry} \times \rho_{air} \left( g_{ca}^{air} \times q + g_{gr}^{ca} \times q_{gr} - (g_{ca}^{air} + g_{gr}^{ca}) \times \left( q_{sat} + \frac{\delta q_{sat}^{ca}}{\delta \theta_{veg}} \Delta \theta_{veg} \right) \right) \times \frac{g_{ca}^{H_s}}{g_{ca}^{air} + g_{st}^w + g_{gr}^{ca}}$                 |
| CLM5.0     | $T = -r_{ca,dry} \times \rho_{air} \left( g_{ca}^{air} \times q + g_{gr}^{ca} \times q_{gr} - (g_{ca}^{air} + g_{gr}^{ca}) \times \left( q_{sat} + \frac{\delta q_{sat}^{ca}}{\delta \theta_{veg}} \Delta \theta_{veg} \right) \right) \times \frac{g_{ca}^{H_s}}{g_{ca}^{air} + g_{st}^w + g_{gr}^{ca}}$                 |
| CWatM      | $T_{act} = C_{ws} \times (T_{pot} - E_{so})$<br>$C_{ws} = \frac{S_{so,tot1sol} - S_{so,WP1sol}}{S_{so,crit1sol} - S_{so,WP1sol}}$<br>$S_{so,crit1sol} = (1 - f_{so,dep}) \times (S_{so,FC1sol} - S_{so,WP1sol}) + S_{so,WP1sol}$<br>$f_{so,dep} = \frac{1}{0.76 + 1.5 \times T_{max}} - 0.1 \times (5 \times C_{cropGN})$ |
| DBH        | $T = \frac{1}{H_{l,E}} \times \frac{e_{ca} - e}{g_{ca} + 2 \times r_b} \times \frac{\rho_{air} \times C_{air}}{\gamma} \times (1 - f_{ca,wet})$                                                                                                                                                                           |
| H08        | Transpiration is not explicitly computed, but is considered in the parameter snow-free albedo, taken from the GSWP2 standard monthly land use data set and included plant phenological aspects.                                                                                                                           |
| JULES-W1   | $T = PET \times f_{ca} \times \frac{g_{ca}}{g_{ca} + C_H \times W_2}$                                                                                                                                                                                                                                                     |
| LPJmL      | $T = \min \left( T_{max} \times S_{so,rel}, (1 - f_{day,ca,wet}) \times PET \times \frac{1.391}{1 + \frac{g_{st,pot}}{3.26}} \right)$<br>$(1 - f_{day,ca,wet})$ is remaining day time canopy available energy.                                                                                                            |
| MaC-PDM.20 | Transpiration is not modeled separately, see Table S24.                                                                                                                                                                                                                                                                   |
| MATSIRO    | $T = T_{ca}^{sn,free} + T_{ca}^{sn,cov}$                                                                                                                                                                                                                                                                                  |
| mHM        | Transpiration is not modeled separately, see Table S24, where the Feddes equation based on the PET concept is used.                                                                                                                                                                                                       |
| MPI-HM     | $T = f_{ca} \times PET \times \min \left( 1, \max \left( 0, \frac{S_{so} - S_{so,WP}}{0.75 \times S_{so,max} - S_{so,WP}} \right) \right)$                                                                                                                                                                                |
| ORCHIDEE   | $T = (q_{sat} - q) \times W \times C_{su} \times (1 - r_{sn}) \times r_{ca}$                                                                                                                                                                                                                                              |
| PCR-GLOBWB | $T = \min(C_{crop} \times PET, \theta_{so})$                                                                                                                                                                                                                                                                              |
| VIC        | $T = \left( 1 - \left( \frac{S_{ca}}{S_{ca,max}} \right)^{\frac{2}{3}} \right) \times PET \times \frac{r_w}{r_w + r_o + r_{ca}}$                                                                                                                                                                                          |
| WaterGAP2  | See details in: Blondin [6]; Ducoudré et al. [16]                                                                                                                                                                                                                                                                         |
| WAYS       | Transpiration is not modeled separately, see Table S24.                                                                                                                                                                                                                                                                   |

**Table S24.** Evaporation from soil ( $E_{so}$ )

| Model      | Equation                                                                                                                                                                                                                                                                                                                                                                                                                                                                                                                                                                  |
|------------|---------------------------------------------------------------------------------------------------------------------------------------------------------------------------------------------------------------------------------------------------------------------------------------------------------------------------------------------------------------------------------------------------------------------------------------------------------------------------------------------------------------------------------------------------------------------------|
| CLM4.5     | $E_{so} = -\frac{\rho_{air}(q - q_{sat}^{gr})}{r_{so}}$                                                                                                                                                                                                                                                                                                                                                                                                                                                                                                                   |
| CLM5.0     | $E_{so} = -\frac{\rho_{air}(q - q_{sat}^{gr})}{r_{so}}$                                                                                                                                                                                                                                                                                                                                                                                                                                                                                                                   |
| CWatM      | $E_{so} = C_{crop} \times PET$                                                                                                                                                                                                                                                                                                                                                                                                                                                                                                                                            |
| DBH        | $E_{so} = \frac{1}{H_{l,E}} \times \frac{q_{so} \times (e_{ca} - e)}{r_{so} + r_{wca}} \times \frac{\rho_{air} \times c_{air}}{\gamma} \times (1 - f_{su,gr})$                                                                                                                                                                                                                                                                                                                                                                                                            |
| H08        | $E_{so} = \alpha \times PET$<br>where:<br>$\begin{cases} \alpha = 1, & S_{so,tot} \geq S_{so,crit} \\ \alpha = \frac{S_{so,tot}}{S_{so,crit}}, & S_{so,tot} < S_{so,crit} \end{cases}$ $S_{so,crit} = 0.75 \times S_{so,FC}$ (fixed at 150 [kgm <sup>-2</sup> ]. For detail see [40].                                                                                                                                                                                                                                                                                     |
| JULES-W1   | $E_{so} = PET \times (1 - f_a) \times \frac{(1 - f_{ca}) \times g_{so}}{(1 - f_{ca}) \times g_{so} + C_H \times W_2}$<br>$g_{so} = \frac{1}{100} \times \left( \frac{S_{so,FL}}{S_{so,crit}} \right)^2$                                                                                                                                                                                                                                                                                                                                                                   |
| LPJmL      | $E_{so} = E_{cq} \times \alpha \times S_{so,rel} \times (1 - f_{ca,G})$                                                                                                                                                                                                                                                                                                                                                                                                                                                                                                   |
| Mac-PDM.20 | $E_{so}$ is assumed to occur at the $PET$ rate until $S_{so,FC}$ is reached, below which the ratio of $E_{so}$ to $PET$ declines linearly to zero:<br>$\frac{E_{so}}{PET} = 1, \quad S_{so} \geq S_{so,FC}$ $\frac{E_{so}}{PET} = \frac{S_{so}}{S_{so,FC}}, \quad S_{so} \leq S_{so,FC}$                                                                                                                                                                                                                                                                                  |
| MATSIRO    | $E_{so} = E_{so,l}^{sn,freegr}$                                                                                                                                                                                                                                                                                                                                                                                                                                                                                                                                           |
| mHM        | $ET_{so,i} = \begin{cases} \alpha \times f_{root,i} \times PET', & \text{for } i = 0 \text{ (first layer)} \\ \alpha \times f_{root,i} \times (PET' - \sum_{l=0}^{i-1} ET_{so,l}), & \text{for } i > 0 \end{cases}$<br>$PET' = PET - E_{ca} - \frac{S_{pon}}{S_{pon,max}} (PET_{ows} - E_{ca})$<br>$\alpha = \begin{cases} 0, & \frac{S_{so,i}}{d_{so,i}} \leq S_{so,r,i} \\ \frac{\frac{S_{so,i}}{d_{so,i}} - S_{so,r,i}}{S_{so,w,i} - S_{so,r,i}}, & S_{so,r,i} < \frac{S_{so,i}}{d_{so,i}} \leq S_{so,w,i} \\ 1, & S_{so,w,i} < \frac{S_{so,i}}{d_{so,i}} \end{cases}$ |
| MPI-HM     | $E_{so} = f_{so,bare} \times PET \times \min \left( 1, \max \left( 0, \frac{S_{so} - 0.05 \times S_{so,max}}{S_{so,max} - 0.05 \times S_{so,max}} \right) \right)$                                                                                                                                                                                                                                                                                                                                                                                                        |
| ORCHIDEE   | $E_{so} = (q_{sat}^{ca} - q) \times W \times C_{su} \times (1 - r_{floodplain}) \times (1 - r_{sn}) \times r_{so}$                                                                                                                                                                                                                                                                                                                                                                                                                                                        |
| PCR-GLOBWB | $E_{so} = C_{crop} \times PET$                                                                                                                                                                                                                                                                                                                                                                                                                                                                                                                                            |
| VIC        | The bare soil evaporation only occurs on the top thin layer. When the surface soil is saturated, it evaporates at the potential evaporation rate. When the top soil layer is not saturated, its evaporation rate ( $E1$ ) is calculated using the Arno formulation by Franchini and Pacciani [19].<br>$E_{so} = PET \times \left( \int_{i=0}^{f_{so,bare,sat}} \delta f_{R_{in,0}} + \int_{f_{so,bare,sat}}^1 \times \frac{R_{in,0}}{R_{in,max} \left( 1 - (1 - f_{R_{in,0}})^{\frac{1}{H_{R_{in}}}} \right)} \delta f_{R_{in,0}} \right)$                                |
| WaterGAP2  | $E_{so} = \min \left( PET - E_{ca}, (PET_{,max} - E_{ca}) \times \frac{S_{so}}{S_{so,max}} \right)$<br>$PET_{,max} = 15 \text{ (mm day}^{-1}\text{)}$<br>Note: Evaporation and transpiration are calculated together.                                                                                                                                                                                                                                                                                                                                                     |
| WAYS       | $E_{so} = (PET - E_{ca}) \times \min \left( 1, \frac{S_{rz}}{v \times S_{rz,max} \times (1 + \beta)} \right)$<br>the scale parameter $v$ is set to 0.5, and the shape parameter $\beta$ need to be fitted during the calibration processes.<br>Note: Evaporation and transpiration are calculated together.                                                                                                                                                                                                                                                               |

**Table S25.** Infiltration ( $R_{in}$ )

| Model      | Equation                                                                                                                                                                                                                                                                                                                                                                                                                           |
|------------|------------------------------------------------------------------------------------------------------------------------------------------------------------------------------------------------------------------------------------------------------------------------------------------------------------------------------------------------------------------------------------------------------------------------------------|
| CLM4.5     | $R_{in} = R_{in,over-so} + R_{pe,h2osfc}$ $R_{in,over-so} = (1 - f_{h2o})Q_{in,surf} - R_{ho} - (1 - f_{sn} - f_{h2o})E_{so}$ $R_{pe,h2osfc} = \min\left(f_{h2o}R_{in,max}, \frac{w_{sfc}}{\Delta t}\right)$                                                                                                                                                                                                                       |
| CLM5.0     | $R_{in} = R_{in,over-so} + R_{pe,h2osfc}$ $R_{in,over-so} = (1 - f_{h2o})Q_{in,surf} - R_{ho} - (1 - f_{sn} - f_{h2o})E_{so}$ $R_{pe,h2osfc} = \min\left(f_{h2o}R_{in,max}, \frac{w_{sfc}}{\Delta t}\right)$                                                                                                                                                                                                                       |
| CWatM      | $R_{in,pot} = \frac{S_{so,sat}}{\beta + 1} - \frac{S_{so,sat}}{\beta + 1} \times \left(1 - (1 - \alpha)^{\frac{\beta + 1}{\beta}}\right)$ $\alpha = 1 - \left(1 - \frac{S_{so,rel}}{S_{so,sat}}\right)^\beta$ $R_{in} = \min(P_{tot}, R_{in,pot})$ <p>The infiltration capacity of the soil is estimated using the Xinanjiang (also known as VIC/ARNO) model<br/> <math>\beta</math> = shape parameter of the Xinanjiang model</p> |
| DBH        | $R_{in} = k_{sat} \times \left(1 + \frac{(S_{so,sat} - S_{so,ini}) \times S_{so,pot}}{R_{in,cum}}\right)$                                                                                                                                                                                                                                                                                                                          |
| H08        | $R_{in} = \frac{S_{so,FC}}{t} \times \frac{S_{so,tot}^\tau}{S_{so,FC}}$ . See [21]<br>$t = 100$ [days] = $86400 \times 100$ [s]; $\tau$ is set at 2.                                                                                                                                                                                                                                                                               |
| JULES-W1   | $R_{in} = k \times \left(\frac{\delta T}{\delta d_{so}} + 1\right); k = k_{sat} \left(\frac{\theta}{\theta_{so}}\right)^{2 \times a + 3}$                                                                                                                                                                                                                                                                                          |
| LPJmL      | $R_{in} = P_{tot} \times \sqrt{1 - \frac{S_{so,tot} - S_{so,WP}}{S_{so,sat,FL} - S_{so,WP}}$ i = top layer                                                                                                                                                                                                                                                                                                                         |
| Mac-PDM.20 | $R_{in} = P_{tot} - R_{sat}$                                                                                                                                                                                                                                                                                                                                                                                                       |
| MATSIRO    | $R_{in} = P_{th} - R_{ho} - R_{sat}$                                                                                                                                                                                                                                                                                                                                                                                               |
| mHM        | $R_{in,i} = \begin{cases} P_{th} + M - R_{su}, & i = 0 \text{ (top soil layer)} \\ R_{in,i-1} - \left(\frac{S_{so,i} - S_{so,r,i}}{S_{so,max,i} - S_{so,r,i}}\right)^{a_i}, & i > 0 \end{cases}$                                                                                                                                                                                                                                   |
| MPI-HM     | $R_{in} = (P_{ra} + M) \times (1 - f_{we}) - R_{su}$                                                                                                                                                                                                                                                                                                                                                                               |
| ORCHIDEE   | $R_{in,j} = \frac{k_{j,j} + k_{sat,j}}{2}$                                                                                                                                                                                                                                                                                                                                                                                         |
| PCR-GLOBWB | $R_{in} = \min(P_{ra} + M, k_{sat})$                                                                                                                                                                                                                                                                                                                                                                                               |
| VIC        | <p>for there is no vegetation coverage:</p> $R_{in} = P_{ra} - R_{pe}$ <p>for there is vegetation coverage:</p> $R_{in} = P_{th} - R_{pe}$ <p>See [20]; [29].</p>                                                                                                                                                                                                                                                                  |
| WaterGAP2  | $R_{in} = M + P_{th} - (0.5 \times (M + P_{th}) \times f_{bu})$                                                                                                                                                                                                                                                                                                                                                                    |
| WAYS       | $R_{in} = M + P_{th}$                                                                                                                                                                                                                                                                                                                                                                                                              |

**Table S26.** Interflow ( $R_{if}$ )

| Model      | Equation                                                                                                                                                                                                                                                                        |
|------------|---------------------------------------------------------------------------------------------------------------------------------------------------------------------------------------------------------------------------------------------------------------------------------|
| CLM4.5     | not represented                                                                                                                                                                                                                                                                 |
| CLM5.0     | not represented                                                                                                                                                                                                                                                                 |
| CWatM      | $R_{if} = f_{if} \times R_{pe}$                                                                                                                                                                                                                                                 |
| DBH        | not represented                                                                                                                                                                                                                                                                 |
| H08        | not represented                                                                                                                                                                                                                                                                 |
| JULES-W1   | $R_{if} = \begin{cases} 0, & S_{so,tot} < S_{so,WP} \\ R_{in,sat} \times S_{ca} \times \frac{S_{so,tot} - S_{so,WP}}{R_{in,sat} - S_{so,WP}}, & S_{so,WP} \leq S_{so,tot} < S_{so,sat} \\ R_{in,sat}, & S_{so,tot} > S_{so,sat} \end{cases}$                                    |
| LPJmL      | $R_{if} = R_{in,L} \sqrt{1 - \frac{S_{so,tot} - S_{so,WP}}{S_{so,sat} - S_{so,WP}}}$                                                                                                                                                                                            |
| Mac-PDM.20 | not represented                                                                                                                                                                                                                                                                 |
| MATSIRO    | not included in the version used in ISIMIP2b                                                                                                                                                                                                                                    |
| mHM        | $R_{if,fast} = \begin{cases} k_0 \times (S_{uz} - S_{uz,thr}), & S_{uz} > S_{uz,thr} \\ 0, & S_{uz} \leq S_{uz,thr} \end{cases}$ $R_{if,slow} = k_1 \times (S_{uz})^{1+a_{uz}}$ <p>Interflow originates from the unsaturated zone storage, a bucket below the soil storage.</p> |
| MPI-HM     | not represented                                                                                                                                                                                                                                                                 |
| ORCHIDEE   | not represented                                                                                                                                                                                                                                                                 |
| PCR-GLOBWB | $R_{if} = R_{pe} - R_{cr}$ for $R_{pe} > R_{cr}$                                                                                                                                                                                                                                |
| VIC        | not represented                                                                                                                                                                                                                                                                 |
| WaterGAP2  | not represented                                                                                                                                                                                                                                                                 |
| WAYS       | $R_{if} = \frac{S_f}{K_f}$ <p><math>K_f</math> needs to be fitted.</p>                                                                                                                                                                                                          |

**Table S27.** Percolation ( $R_{pe}$ )

| Model      | Equation                                                                                                                          |
|------------|-----------------------------------------------------------------------------------------------------------------------------------|
| CLM4.5     | not represented                                                                                                                   |
| CLM5.0     | not represented                                                                                                                   |
| CWatM      | $R_{pe} = (1 - f_{we}) \times \min(R_{in}, k_{3so})$<br>Unsaturated conductivity using Van Genuchten equation for each soil layer |
| DBH        | not represented                                                                                                                   |
| H08        | not represented                                                                                                                   |
| JULES-W1   | not represented                                                                                                                   |
| LPJmL      | $R_{pe} = (S_{so,sat} - S_{so,FC}) \times \left[ 1 - \exp\left(\frac{-\Delta t}{\frac{S_{so,FC}}{k}}\right) \right]$              |
| Mac-PDM.20 | not represented                                                                                                                   |
| MATSIRO    | not explicitly represented                                                                                                        |
| mHM        | not represented (defined as groundwater recharge, see Table S30)                                                                  |
| MPI-HM     | not represented                                                                                                                   |
| ORCHIDEE   | not represented                                                                                                                   |
| PCR-GLOBWB | not represented                                                                                                                   |
| VIC        | not represented                                                                                                                   |
| WaterGAP2  | not represented                                                                                                                   |
| WAYS       | not explicitly represented                                                                                                        |

**Table S28.** Capillary rise ( $R_{cr}$ )

| Model      | Equation                                                                                                                                                                        |
|------------|---------------------------------------------------------------------------------------------------------------------------------------------------------------------------------|
| CLM4.5     | Represented through the concept of soil matrix potential:<br>$\Psi_i = \Psi_{sat,i} \left( \frac{S_{so,tot}}{S_{so,sat}} \right)^{C_{so,i}} \geq -1 \times 10^8$                |
| CLM5.0     | Represented through the concept of soil matrix potential:<br>$\Psi_i = \Psi_{sat,i} \left( \frac{S_{so,tot}}{S_{so,sat}} \right)^{C_{so,i}} \geq -1 \times 10^8$                |
| CWatM      | $R_{cr} = 0.5 \times \sqrt{k_{3so} \times k_{sat}} \times R_{cr,max}$<br>$R_{cr,max}$ : cell fraction, depending on height of ground water table and relative elevation of grid |
| DBH        | not represented                                                                                                                                                                 |
| H08        | not represented                                                                                                                                                                 |
| JULES-W1   | not represented                                                                                                                                                                 |
| LPJmL      | not represented                                                                                                                                                                 |
| Mac-PDM.20 | not represented                                                                                                                                                                 |
| MATSIRO    | $R_{cr} = k \times \left( \frac{\delta Z_{cr}}{\delta Z} - 1 \right)$                                                                                                           |
| mHM        | not represented                                                                                                                                                                 |
| MPI-HM     | not represented                                                                                                                                                                 |
| ORCHIDEE   | not represented                                                                                                                                                                 |
| PCR-GLOBWB | $R_{cr} = 0.5 \times \sqrt{k_{3so} \times k_{sat}} \times R_{cr,max}$<br>$R_{cr,max}$ : cell fraction, depending on height of ground water table and relative elevation of grid |
| VIC        | not represented                                                                                                                                                                 |
| WaterGAP2  | not represented                                                                                                                                                                 |
| WAYS       | not represented                                                                                                                                                                 |

**Table S29.** Groundwater storage ( $S_{gw}$ )

| Model      | Equation                                                                                                                                                                                                                                                                                                                                                                      | Water Flux      |                                                                               |
|------------|-------------------------------------------------------------------------------------------------------------------------------------------------------------------------------------------------------------------------------------------------------------------------------------------------------------------------------------------------------------------------------|-----------------|-------------------------------------------------------------------------------|
|            |                                                                                                                                                                                                                                                                                                                                                                               | Inflows         | Outflows                                                                      |
| CLM4.5     | Only represented indirectly through changes in the water table depth (unconfined aquifer)<br>$\Delta d_{wt} = \frac{(R_{gwr} - R_{gw})}{S_y} \Delta t$                                                                                                                                                                                                                        | $R_{gwr}$       | $R_{gw}$                                                                      |
| CLM5.0     | Only represented indirectly through changes in the water table depth (unconfined aquifer)<br>$\Delta d_{wt} = \frac{(R_{gwr} - R_{gw})}{S_y} \Delta t$                                                                                                                                                                                                                        | $R_{gwr}$       | $R_{gw}$                                                                      |
| CWatM      | $\frac{\delta S_{gw}}{\delta t} = Q_{pf} + R_{pe} - R_{cr} - R_{gw} - A_{irr}^{gw} - A_{dom}^{gw} - A_{man}^{gw} - A_{liv}^{gw}$                                                                                                                                                                                                                                              | $R_{pe} Q_{pf}$ | $R_{cr} R_{gw}$<br>$A_{irr}^{gw} A_{dom}^{gw}$<br>$A_{man}^{gw} A_{liv}^{gw}$ |
| DBH        | not represented                                                                                                                                                                                                                                                                                                                                                               |                 |                                                                               |
| H08        | $\frac{\delta S_{gw}}{\delta t} = S_{gw,rw} - S_{gw,nrw}$<br>$S_{gw,rw} = R_{gwr} - R_{gw} - \frac{A_{tot}}{BG}$                                                                                                                                                                                                                                                              | $R_{gwr}$       | $R_{gw} A_{tot}$                                                              |
| JULES-W1   | not represented                                                                                                                                                                                                                                                                                                                                                               |                 |                                                                               |
| LPJmL      | not represented                                                                                                                                                                                                                                                                                                                                                               |                 |                                                                               |
| Mac-PDM.20 | $\frac{\delta S_{gw}}{\delta t} = R_{gwr} - R_{gw}$                                                                                                                                                                                                                                                                                                                           | $R_{gwr}$       | $R_{gw}$                                                                      |
| MATSIRO    | $\frac{\delta S_{gw}}{\delta t} = \sum_{n=1,13} ((S_{so,F_i} + S_{so,uF_i}) \times d_{so})$<br>It explicitly diagnoses groundwater table depth and calculate water flux between groundwater storage and unsaturated soil based on the condition of the soil layer that has groundwater table. Groundwater pumping and baseflow are used instead of root uptake and interflow. |                 |                                                                               |
| mHM        | no water table depth or confined aquifers are considered:<br>$\frac{\delta S_{gw}}{\delta t} = R_{gwr} - R_{gw}$                                                                                                                                                                                                                                                              | $R_{gwr}$       | $R_{gw}$                                                                      |
| MPI-HM     | very simple representation, no water table depth or confined aquifers are considered<br>$\frac{\delta S_{gw}}{\delta t} = R_{gwr} - R_{gw} - f_{irr} \times S_{gw}$                                                                                                                                                                                                           | $R_{gwr}$       | $R_{gw}$                                                                      |
| ORCHIDEE   | not represented                                                                                                                                                                                                                                                                                                                                                               |                 |                                                                               |
| PCR-GLOBWB | $\frac{\delta S_{gw}}{\delta t} = R_{pe} - R_{cr} - R_{gw} - A_{irr}^{gw} - A_{dom}^{gw} - A_{man}^{gw} - A_{liv}^{gw}$                                                                                                                                                                                                                                                       | $R_{pe}$        | $R_{cr} R_{gw}$<br>$A_{irr}^{gw} A_{dom}^{gw}$<br>$A_{man}^{gw} A_{liv}^{gw}$ |
| VIC        | not represented                                                                                                                                                                                                                                                                                                                                                               |                 |                                                                               |
| WaterGAP2  | $\frac{\delta S_{gw}}{\delta t} = R_{gwr} - R_{gw} - A_{gw}$                                                                                                                                                                                                                                                                                                                  | $R_{gwr}$       | $R_{gw} A_{gw}$                                                               |
| WAYS       | $\frac{\delta S_{gw}}{\delta t} = R_{gwr} - R_{gw}$                                                                                                                                                                                                                                                                                                                           | $R_{gwr}$       | $R_{gw}$                                                                      |



**Table S30.** Groundwater recharge ( $R_{gwr}$ )

| Model             | Equation                                                                                                                                                                                                                                                                                                 |
|-------------------|----------------------------------------------------------------------------------------------------------------------------------------------------------------------------------------------------------------------------------------------------------------------------------------------------------|
| CLM4.5            | $R_{gwr} = -k_{aq} \frac{(\Psi_{wt} - \Psi_{jw})}{(d_{wt} - d_{wt,i})}$                                                                                                                                                                                                                                  |
| CLM5.0            | $R_{gwr} = -k_{aq} \frac{(\Psi_{wt} - \Psi_{jw})}{(d_{wt} - d_{wt,i})}$                                                                                                                                                                                                                                  |
| CWatM             | $R_{gwr} = R_{pe} + Q_{pf} - R_{cr}$                                                                                                                                                                                                                                                                     |
| DBH               | $R_{gwr} = k_{3so} \times \left( \frac{\delta S_{so,max,3L}}{\delta d_{so,3}} + 1 \right)$                                                                                                                                                                                                               |
| H08               | $R_{gwr} = \min(R_{gwr,max}, f_r \times f_{so,tex} \times f_{hg} \times f_{pg} \times R_{tot})$ . See [11]                                                                                                                                                                                               |
| JULES-W1          | $R_{gwr} = k_{bot}$ . See [4] and [5].                                                                                                                                                                                                                                                                   |
| LPJmL             | $R_{gwr} = R_{in,BL} \sqrt{1 - \frac{S_{so,tot} - S_{so,WP}}{S_{so,sat} - S_{so,WP}}}$                                                                                                                                                                                                                   |
| Mac-PDM.20        | $R_{gwr} = S_{so} - S_{so,FC}$                                                                                                                                                                                                                                                                           |
| MATSIRO           | $R_{gwr} = \frac{\delta S_{so,uF_{i,gw}}}{\Delta t}$                                                                                                                                                                                                                                                     |
| mHM               | $R_{gwr} = k_{uz} S_{uz}$                                                                                                                                                                                                                                                                                |
| MPI-HM            | $R_{gwr} = (1 - f_{we}) \times R_{gwr,min} \times \frac{S_{so}}{S_{so,max}} + (R_{gwr,max} - R_{gwr,min}) \times \left( \min \left( 1, \max \left( 0, \frac{S_{so} - 0.90 \times S_{so,max}}{S_{so,max} - 0.90 \times S_{so,max}} \right) \right)^{1.5} \right)$<br>if $S_{so} > 0.05 \times S_{so,max}$ |
| ORCHIDEE          | $R_{gwr} = \max(0, 1 - \frac{S_{so}}{S_{sotmax}}) \times R_{gw}$ See [15]                                                                                                                                                                                                                                |
| PCR-GLOBWB<br>VIC | $R_{gwr} = R_{pe} - R_{cr}$<br>not represented                                                                                                                                                                                                                                                           |
| WaterGAP2         | $R_{gwr} = \begin{cases} 0 & \text{(semi)arid grid cell, sandy texture and } P_{th} \leq 12.5(\text{mm day}^{-1}) \\ \min(R_{gwr,max}, f_r \times f_{so,tex} \times f_{hg} \times f_{pg} \times R_{tot}) & \text{other cases} \end{cases}$                                                               |
| WAYS              | where $R_{gwr,max}$ is set to 7, 4.5, 2.5 mm d <sup>-1</sup> for sandy, loamy, and clayey soils. See [11]<br>$R_{gwr} = \min(R_{gwr,max}, f_r \times f_{so,tex} \times f_{hg} \times f_{pg} \times R_{tot})$ . See [11]                                                                                  |

**Table S31.** Groundwater runoff ( $R_{gw}$ )

| Model      | Equation                                                                                                                                                                                                                                                                                                                                                                                                   |
|------------|------------------------------------------------------------------------------------------------------------------------------------------------------------------------------------------------------------------------------------------------------------------------------------------------------------------------------------------------------------------------------------------------------------|
| CLM4.5     | $R_{gw} = C_{ice} \times R_{gw,max} \exp(-f_{drai} d_{wt})$                                                                                                                                                                                                                                                                                                                                                |
| CLM5.0     | $R_{gw} = C_{ice} \times R_{gw,max} \exp(-f_{drai} d_{wt})$                                                                                                                                                                                                                                                                                                                                                |
| CWatM      | $R_{gw} = C_{gw,Q} \times S_{gw}$                                                                                                                                                                                                                                                                                                                                                                          |
| DBH        | not represented                                                                                                                                                                                                                                                                                                                                                                                            |
| H08        | $R_{gw} = \frac{S_{gw,max}}{t} \times \left( \frac{S_{gw,rw}}{S_{gw,max}} \right)^\eta$<br>where $\eta = 2$ and $t = 100$ days.                                                                                                                                                                                                                                                                            |
| JULES-W1   | not represented                                                                                                                                                                                                                                                                                                                                                                                            |
| LPJmL      | not represented                                                                                                                                                                                                                                                                                                                                                                                            |
| Mac-PDM.20 | $R_{gw} = R_{gw,rout} \times (S_{gw}/100)^3$                                                                                                                                                                                                                                                                                                                                                               |
| MATSIRO    | $R_{gw} = \frac{k_{sat}^{gw} \times v^\beta}{\Gamma_\beta} \left( d_0 \times \left( \frac{(\beta-1)!}{v^\beta} - e^{(-v \times d_0)} \times \sum_{n=0}^{\beta-1} \frac{(\beta-1)!}{n!} \times \frac{d_0^n}{v^{\beta-n}} \right) - \left( \frac{\beta!}{v^{\beta+1}} - e^{(-v \times d_0)} \times \sum_{n=0}^{\beta} \frac{\beta!}{n!} \times \frac{d_0^n}{v^{\beta-n+1}} \right) \right)$ . See [27]; [55] |
| mHM        | $R_{gw} = k_b S_{gw}$                                                                                                                                                                                                                                                                                                                                                                                      |
| MPI-HM     | $R_{gw} = \frac{S_{gw}}{k_{gw}}$                                                                                                                                                                                                                                                                                                                                                                           |
| ORCHIDEE   | $R_{gw} = k_{bot}$                                                                                                                                                                                                                                                                                                                                                                                         |
| PCR-GLOBWB | $R_{gw} = C_{gw,Q} \times S_{gw}$                                                                                                                                                                                                                                                                                                                                                                          |
| VIC        | not represented                                                                                                                                                                                                                                                                                                                                                                                            |
| WaterGAP2  | $R_{gw} = \begin{cases} 0, & S_{gw} \leq 0 \\ C_{gw,Q} \times S_{gw}, & S_{gw} > 0 \end{cases}$<br>where $C_{gw,Q} = 0.01 d^{-1}$                                                                                                                                                                                                                                                                          |
| WAYS       | $R_{gw} = C_{gw,Q} \times S_{gw}$<br>where $C_{gw,Q} = 0.01 d^{-1}$                                                                                                                                                                                                                                                                                                                                        |

**Table S32.** Lake storage ( $S_{la}$ )

| Model      | Equation                                                                                                                                                                                                  | Water Flux                                                             |                                                                             |
|------------|-----------------------------------------------------------------------------------------------------------------------------------------------------------------------------------------------------------|------------------------------------------------------------------------|-----------------------------------------------------------------------------|
|            |                                                                                                                                                                                                           | Inflows                                                                | Outflows                                                                    |
| CLM4.5     | virtual storage, i.e. P-E automatically balanced by lake runoff term                                                                                                                                      |                                                                        |                                                                             |
| CLM5.0     | virtual storage, i.e. P-E automatically balanced by lake runoff term                                                                                                                                      |                                                                        |                                                                             |
| CWatM      | it has two types of lakes: "global lakes" are lakes that receive inflow not only from the grid cell itself and "local lakes" receive inflow from the grid cell itself.                                    | $Q_{ri,in}$                                                            | $Q_{ri,out}$                                                                |
|            | $\frac{\delta S_{la}}{\delta t} = Q_{ri,in} - Q_{ri,out}$                                                                                                                                                 |                                                                        |                                                                             |
| DBH        | not represented                                                                                                                                                                                           |                                                                        |                                                                             |
| H08        | not represented                                                                                                                                                                                           |                                                                        |                                                                             |
| JULES-W1   | not represented                                                                                                                                                                                           |                                                                        |                                                                             |
| LPJmL      | $\frac{\delta S_{la}}{\delta t} = P_{tot} + Q_{iu} - Q_{la} - E_{la} - A$                                                                                                                                 | $P_{tot}, Q_{iu}$                                                      | $E_{la}, A$                                                                 |
| Mac-PDM.20 | not represented                                                                                                                                                                                           |                                                                        |                                                                             |
| MATSIRO    | Lake storage is a part of river storage. Not explicitly included in the version used for ISIMIP2b.                                                                                                        |                                                                        |                                                                             |
| mHM        | not represented                                                                                                                                                                                           |                                                                        |                                                                             |
| MPI-HM     | Lake storage is part of the wetland storage.                                                                                                                                                              |                                                                        |                                                                             |
| ORCHIDEE   | not represented                                                                                                                                                                                           |                                                                        |                                                                             |
| PCR-GLOBWB | Lake storage is a part of river storage.                                                                                                                                                                  |                                                                        |                                                                             |
| VIC        | not represented                                                                                                                                                                                           |                                                                        |                                                                             |
| WaterGAP2  | WaterGAP2 has two types of representations of lakes. Local lakes receive water only from the grid cell itself, while global lakes receive water from grid cell itself and the inflow from upstream cells. | $R_{su}, R_{gw},$<br>$P_{tot}, Q_{iu},$<br>$Q_{we,local},$<br>$A_{rf}$ | $R_{gwr}^{swb}, A_{la},$<br>$Q_{la,local},$<br>$Q_{la,global},$<br>$E_{la}$ |
|            | $\frac{\delta S_{la,local}}{\delta t} = (R_{su} \times f_{swb}) + R_{gw} + A_{rf} + B_{la,local} \times (P_{tot} - E_{la}) - R_{gwr}^{swb} - A_{la} - Q_{la,local}$                                       |                                                                        |                                                                             |
|            | $B_{la,local} = C_{B,red} \times B_{la,local,max}$                                                                                                                                                        |                                                                        |                                                                             |
|            | $C_{B,red} = 1 - \left( \frac{ S_{la,local} - S_{la,local,max} }{2S_{la,local,max}} \right)^{3.32}$                                                                                                       |                                                                        |                                                                             |
|            | $R_{gwr}^{swb} = \begin{cases} 0, & \text{humid cell} \\ C_{gw,rech}^{sw} \times C_{B,red} \times B_{la,local}, & \text{arid and semi-arid cells} \end{cases}$                                            |                                                                        |                                                                             |
|            | $\frac{\delta S_{la,global}}{\delta t} = Q_{iu} + A_{rf} + Q_{we,local} + B_{la,global} \times (P_{tot} - E_{la}) - R_{gwr}^{swb} - A_{la} - Q_{la,global}$                                               |                                                                        |                                                                             |
|            | $B_{la,global} = C_{B,red} \times B_{la,global,max}$                                                                                                                                                      |                                                                        |                                                                             |
|            | $C_{B,red} = 1 - \left( \frac{ S_{la,global} - S_{la,global,max} }{2S_{la,global,max}} \right)^{3.32}$                                                                                                    |                                                                        |                                                                             |
|            | $R_{gwr}^{swb} = \begin{cases} 0, & \text{humid cell} \\ C_{gw,rech}^{sw} \times C_{B,red} \times B_{la,global}, & \text{arid and semi-arid cells} \end{cases}$                                           |                                                                        |                                                                             |
| WAYS       | not represented                                                                                                                                                                                           |                                                                        |                                                                             |

**Table S33.** Evaporation from lake ( $E_{la}$ )

| Model      | Equation                                                        |
|------------|-----------------------------------------------------------------|
| CLM4.5     | not represented                                                 |
| CLM5.0     | not represented                                                 |
| CWatM      | $E_{la} = \min(S_{la}, E_{la,pot} - \min(P_{tot}, E_{la,pot}))$ |
| DBH        | not represented                                                 |
| H08        | not represented                                                 |
| JULES-W1   | not represented                                                 |
| LPJmL      | $E_{la} = \min(S_{la}, E_{la,pot})$                             |
| Mac-PDM.20 | $E_{la} = P_{tot} - PET$                                        |
| MATSIRO    | not represented                                                 |
| mHM        | not represented                                                 |
| MPI-HM     | not represented                                                 |
| ORCHIDEE   | not represented                                                 |
| PCR-GLOBWB | $E_{la} = PET$                                                  |
| VIC        | not represented                                                 |
| WaterGAP2  | $E_{la} = PET$ with albedo = 0.08                               |
| WAYS       | not represented                                                 |

**Table S34.** Outflow from lake ( $Q_{la}$ )

| Model      | Equation                                                                                                                                                                                                                                                                                                 |
|------------|----------------------------------------------------------------------------------------------------------------------------------------------------------------------------------------------------------------------------------------------------------------------------------------------------------|
| CLM4.5     | not represented                                                                                                                                                                                                                                                                                          |
| CLM5.0     | not represented                                                                                                                                                                                                                                                                                          |
| CWatM      | Modified Puls approach (Chow et al. [9]; Maniak [30]). Routing, reservoirs and lakes are done in sub steps of a day.<br>$\frac{S_{la1} + S_{la2}}{\Delta t} = \frac{Q_{iu,la1} + Q_{iu,la2}}{2} - \frac{Q_{la1} + Q_{la2}}{2}$ for: 1 = first time step ( $t$ ); 2 = second time step ( $t + \Delta t$ ) |
| DBH        | not represented                                                                                                                                                                                                                                                                                          |
| H08        | not represented                                                                                                                                                                                                                                                                                          |
| JULES-W1   | not represented                                                                                                                                                                                                                                                                                          |
| LPJmL      | for $S_{la} \geq S_{la,max}$ , $Q_{la} = (S_{la,max} - S_{la})$ , else $Q_{la} = 0$                                                                                                                                                                                                                      |
| Mac-PDM.20 | not represented                                                                                                                                                                                                                                                                                          |
| MATSIRO    | not included in the version used for ISIMIP2b                                                                                                                                                                                                                                                            |
| mHM        | not represented                                                                                                                                                                                                                                                                                          |
| MPI-HM     | not represented                                                                                                                                                                                                                                                                                          |
| ORCHIDEE   | not represented                                                                                                                                                                                                                                                                                          |
| PCR-GLOBWB | $Q_{la} = 1.7 \times C_{weir} \times \max(h_w - h_{of})^{1.5} \times b_{weir}$                                                                                                                                                                                                                           |
| VIC        | not represented                                                                                                                                                                                                                                                                                          |
| WaterGAP2  | $Q_{la,local} = C_{sw,out} \times S_{la,local} \times \left(\frac{S_{la,local}}{S_{la,local,max}}\right)^{1.5}$<br>$Q_{la,global} = C_{sw,out} \times S_{la,global}$<br>for $C_{sw,out} = 0.01d^{-1}$                                                                                                    |
| WAYS       | not represented                                                                                                                                                                                                                                                                                          |

**Table S35.** Reservoir storage ( $S_{re}$ )

| Model      | Equation                                                                                                                                                                                                                                                                                                                                                                                                                                      | Water Flux                              |                                                 |
|------------|-----------------------------------------------------------------------------------------------------------------------------------------------------------------------------------------------------------------------------------------------------------------------------------------------------------------------------------------------------------------------------------------------------------------------------------------------|-----------------------------------------|-------------------------------------------------|
|            |                                                                                                                                                                                                                                                                                                                                                                                                                                               | Inflows                                 | Outflows                                        |
| CLM4.5     | not represented                                                                                                                                                                                                                                                                                                                                                                                                                               |                                         |                                                 |
| CLM5.0     | not represented                                                                                                                                                                                                                                                                                                                                                                                                                               |                                         |                                                 |
| CWatM      | $\frac{\delta S_{re}}{\delta t} = Q_{ri,in} - Q_{ri,out}$                                                                                                                                                                                                                                                                                                                                                                                     | $Q_{ri,in}$                             | $Q_{ri,out}$                                    |
| DBH        | not represented                                                                                                                                                                                                                                                                                                                                                                                                                               |                                         |                                                 |
| H08        | $\frac{\delta S_{re,local}}{\delta t} = R_{tot} \times B_{re} - A_{re} - Q_{re}$<br>$\frac{\delta S_{re,global}}{\delta t} = Q_{ri,in} - Q_{ri,out}$                                                                                                                                                                                                                                                                                          | $R_{tot} Q_{ri,in}$                     | $A_{re} R_{tot} Q_{ri,out}$                     |
| JULES-W1   | not represented                                                                                                                                                                                                                                                                                                                                                                                                                               |                                         |                                                 |
| LPJmL      | $\frac{\delta S_{re}}{\delta t} = P_{tot} + Q_{iu} - Q_{la} - E_{re} - A$                                                                                                                                                                                                                                                                                                                                                                     | $P_{tot} Q_{iu}$                        | $Q_{la} E_{re} A$                               |
| Mac-PDM.20 | not represented                                                                                                                                                                                                                                                                                                                                                                                                                               |                                         |                                                 |
| MATSIRO    | $\frac{\delta S_{re}}{\delta t} = S_{re,global} + S_{re,local}$<br>$\frac{\delta S_{re,local}}{\delta t} = R_{tot} - \frac{Q_{re,local}}{B} - A_{dom}^{pond} - A_{ind}^{pond} - A_{irr}^{pond}$<br>$\frac{\delta S_{re,global}}{\delta t} = \frac{Q_{iu} + Q_{re,local} - Q_{re}}{B} - A_{dom}^{re,global} - A_{ind}^{re,global} - A_{irr}^{re,global}$                                                                                       | $Q_{iu, re}$                            | $Q_{re} A_{dom} A_{irr} A_{ind}$                |
| mHM        | not represented                                                                                                                                                                                                                                                                                                                                                                                                                               |                                         |                                                 |
| MPI-HM     | not represented                                                                                                                                                                                                                                                                                                                                                                                                                               |                                         |                                                 |
| ORCHIDEE   | not represented                                                                                                                                                                                                                                                                                                                                                                                                                               |                                         |                                                 |
| PCR-GLOBWB | $\frac{\delta S_{re}}{\delta t} = \begin{cases} Q_{ri} = Q_{mean} \text{ for } S_{re} > 0.7 \times S_{re,C} \\ Q_{ri} = \max\left(Q_{mean} \times \frac{S_{re,C} - S_{re,act}}{S_{re,act} - 0.3 \times S_{re,C}}, Q_{ef}\right) \text{ for } 0.3 > S_{re} > 0.7 \times S_{re,C} \\ Q_{ef} \text{ for } 0.3 < S_{re} \end{cases}$                                                                                                              |                                         |                                                 |
| VIC        | not represented                                                                                                                                                                                                                                                                                                                                                                                                                               |                                         |                                                 |
| WaterGAP2  | $\frac{\delta S_{re}}{\delta t} = Q_{iu} + A_{rf} + Q_{we,local} + B_{re} \times (P_{tot} - E_{re}) - R_{gwr}^{sub} - A_{re} - Q_{re}$<br>for $B_{re} = C_{B,red} \times B_{re,max}$<br>for $C_{B,red} = 1 - \left(\frac{ S_{re} - S_{re,max} }{S_{re,max}}\right)^{2.814}$<br>for $R_{gwr}^{sub} = \begin{cases} 0 & \text{for humid cell} \\ C_{gwr}^{sw} \times C_{B,red} \times B_{re} & \text{for arid and semi-arid cells} \end{cases}$ | $Q_{iu}, Q_{we,local}, P_{tot}, A_{rf}$ | $E_{re}, R_{gwr}^{sub}, B_{re}, Q_{re}, A_{re}$ |
| WAYS       | not represented                                                                                                                                                                                                                                                                                                                                                                                                                               |                                         |                                                 |

**Table S36.** Inflow from upstream surface water bodies for reservoir storage

| Model      | Equation                                                                                         |
|------------|--------------------------------------------------------------------------------------------------|
| CLM4.5     | not represented                                                                                  |
| CLM5.0     | not represented                                                                                  |
| CWatM      | sum of inflows of water from neighboring upstream grid cells routed with kinematic wave approach |
| DBH        | not represented                                                                                  |
| H08        | not represented                                                                                  |
| JULES-W1   | not represented                                                                                  |
| LPJmL      | not represented                                                                                  |
| Mac-PDM.20 | not represented                                                                                  |
| MATSIRO    | not represented                                                                                  |
| mHM        | not represented                                                                                  |
| MPI-HM     | not represented                                                                                  |
| ORCHIDEE   | not represented                                                                                  |
| PCR-GLOBWB | sum of inflows of water from neighboring upstream grid cells routed with kinematic wave approach |
| VIC        | not represented                                                                                  |
| WaterGAP2  | not represented                                                                                  |
| WAYS       | not represented                                                                                  |

**Table S37.** Outflow from reservoir ( $Q_{re}$ )

| Model      | Equation                                                                                                                                                                                                                                                                                                                                                                                                                                                                                                                                                                                                                                                                                                                                                                                                                                                                                                                                                                                                                                                                                                                                                                                                                                                                                                                                                                                                                                                                                                         |
|------------|------------------------------------------------------------------------------------------------------------------------------------------------------------------------------------------------------------------------------------------------------------------------------------------------------------------------------------------------------------------------------------------------------------------------------------------------------------------------------------------------------------------------------------------------------------------------------------------------------------------------------------------------------------------------------------------------------------------------------------------------------------------------------------------------------------------------------------------------------------------------------------------------------------------------------------------------------------------------------------------------------------------------------------------------------------------------------------------------------------------------------------------------------------------------------------------------------------------------------------------------------------------------------------------------------------------------------------------------------------------------------------------------------------------------------------------------------------------------------------------------------------------|
| CLM4.5     | not represented                                                                                                                                                                                                                                                                                                                                                                                                                                                                                                                                                                                                                                                                                                                                                                                                                                                                                                                                                                                                                                                                                                                                                                                                                                                                                                                                                                                                                                                                                                  |
| CLM5.0     | not represented                                                                                                                                                                                                                                                                                                                                                                                                                                                                                                                                                                                                                                                                                                                                                                                                                                                                                                                                                                                                                                                                                                                                                                                                                                                                                                                                                                                                                                                                                                  |
| CWatM      | $Q_{re} = \begin{cases} \min(Q_{re,min}, \frac{1}{\Delta t} \times f_{re} \times S_{re,C}), & f_{re} \leq 2 \times S_{cons} \\ Q_{re,min} + (Q_{re,norm} - Q_{re,min}) \times \left( \frac{f_{re} - 2 \times S_{cons}}{S_{norm} - 2 \times S_{cons}} \right), & S_{norm} \geq f_{re} > 2 \times S_{cons} \\ Q_{re,norm} + \frac{f_{re} - S_{flood}}{S_{flood} - S_{norm}} \times \max((Q_{iu,ir} - Q_{re,norm}), (Q_{re,nd} - Q_{re,norm})), & S_{flood} \geq f_{re} > S_{norm} \\ \max(\frac{f_{re} - S_{flood}}{\Delta t} \times S_{re,C}, Q_{re,nd}), & f_{re} > S_{flood} \end{cases}$                                                                                                                                                                                                                                                                                                                                                                                                                                                                                                                                                                                                                                                                                                                                                                                                                                                                                                                       |
| DBH        | not represented                                                                                                                                                                                                                                                                                                                                                                                                                                                                                                                                                                                                                                                                                                                                                                                                                                                                                                                                                                                                                                                                                                                                                                                                                                                                                                                                                                                                                                                                                                  |
| H08        | <p>Non-irrigation dam</p> $Q_{re} = Q_{iu,mean}$ <p>Irrigation reservoir dam</p> $Q_{re} = \begin{cases} C_{year} \times C_{month} \\ \frac{S_{re,C}^2}{0.5} \times C_{year} \times C_{month} + \left(1 - \left(\frac{S_{re,C}}{0.5}\right)^2\right) \end{cases}$ <p>for:</p> $S_{re,C} = \begin{cases} \frac{Q_{iu,mean}}{2} \times \left(1 + \frac{\sum C_{dam,G} \times (A_{irr,month} + A_{ind,month} + A_{dom,month})}{A_{dem,dam}}\right), & A_{dem,dam} \geq 0.5 \times Q_{iu,mean} \\ Q_{iu,mean} + \sum C_{dam,G} \times (A_{irr,month} + A_{ind,month} + A_{dom,month}) - A_{dem,dam}, & A_{dem,dam} < 0.5 \times Q_{iu,mean} \end{cases}$ <p><math>\sum C_{dam,G}</math> = for an area downstream of the dam up to 10 grid cells;</p> $C_{tot} = C_{month} \times Q_{iu,tot,re};$ $C_{month} = \frac{S_{w,first}}{0.85 \times S_{re,tot}};$ $S_{re,C} = \frac{S_{re,tot}}{C_{tot}}$                                                                                                                                                                                                                                                                                                                                                                                                                                                                                                                                                                                                                   |
| LPJmL      | for $S_{re} \geq S_{re,max}$ , $Q_{re} = (S_{re,max} - S_{re})$ , else $Q_{re} = 0$                                                                                                                                                                                                                                                                                                                                                                                                                                                                                                                                                                                                                                                                                                                                                                                                                                                                                                                                                                                                                                                                                                                                                                                                                                                                                                                                                                                                                              |
| Mac-PDM.20 | not represented                                                                                                                                                                                                                                                                                                                                                                                                                                                                                                                                                                                                                                                                                                                                                                                                                                                                                                                                                                                                                                                                                                                                                                                                                                                                                                                                                                                                                                                                                                  |
| MATSIRO    | $Q_{re} = Q_{re,global} + Q_{re,local}$ $Q_{re,local} = \frac{\max(S_{re,local} + R_{tot} \times \Delta t - S_{re,global}, 0)}{\Delta t}$ $Q_{re,global} = \begin{cases} Q_{re,global}^{\text{purpose}} + \frac{S_{re,global}^{\text{purpose}} - S_{re,global}}{\Delta t}, & S_{re,global}^{\text{purpose}} + (Q_{re,local} - Q_{re,global}^{\text{purpose}}) \times \Delta t > S_{re,global} \\ Q_{re,global}^{\text{purpose}} + \frac{S_{re,global}}{\Delta t}, & S_{re,global}^{\text{purpose}} + (Q_{re,local} - Q_{re,global}^{\text{purpose}}) \times \Delta t < 0 \\ Q_{re,global}^{\text{purpose}}, & \text{else} \end{cases}$ $Q_{re,global}^{\text{purpose}} = Q_{re,global}^{\text{irr}} \text{ or } Q_{re,global}^{\text{non-irr}}$                                                                                                                                                                                                                                                                                                                                                                                                                                                                                                                                                                                                                                                                                                                                                                  |
| mHM        | not represented                                                                                                                                                                                                                                                                                                                                                                                                                                                                                                                                                                                                                                                                                                                                                                                                                                                                                                                                                                                                                                                                                                                                                                                                                                                                                                                                                                                                                                                                                                  |
| MPI-HM     | not represented                                                                                                                                                                                                                                                                                                                                                                                                                                                                                                                                                                                                                                                                                                                                                                                                                                                                                                                                                                                                                                                                                                                                                                                                                                                                                                                                                                                                                                                                                                  |
| PCR-GLOBWB | $Q_{re} = 1.7 \times C_{weir} \times \max(h_w - h_{of})^{1.5} \times b_{weir}$                                                                                                                                                                                                                                                                                                                                                                                                                                                                                                                                                                                                                                                                                                                                                                                                                                                                                                                                                                                                                                                                                                                                                                                                                                                                                                                                                                                                                                   |
| WaterGAP2  | <p>irrigation reservoir type:</p> $Q_{re} = \begin{cases} Q_{re,de}^{\text{irr}}, & \frac{S_{re,max}}{Q_{re,mean}} \geq 0.5 \\ 4 \times \left(\frac{S_{re,max}}{Q_{re,mean}}\right)^2 \times Q_{re,de}^{\text{irr}} + (1 - 4 \times \left(\frac{S_{re,max}}{Q_{re,mean}}\right)^2 \times Q_{iu,re}), & \frac{S_{re,max}}{Q_{re,mean}} < 0.5 \end{cases}$ <p>with <math>Q_{re,de}^{\text{irr}} = \begin{cases} C_{year} \times \frac{Q_{re,mean}}{2} \times \left(1 + \frac{A_{dem,5dcells,month}}{A_{dem,5dcells}}\right), &amp; A_{dem,5dcells} \geq \frac{Q_{re,mean}}{2} \\ C_{year} \times Q_{re,mean} + A_{dem,5dcells,month} - A_{dem,5dcells}, &amp; A_{dem,5dcells} &lt; \frac{Q_{re,mean}}{2} \end{cases}</math></p> <p>non-irrigation reservoir type:</p> $Q_{re} = \begin{cases} C_{year} \times Q_{re,mean}, & \frac{S_{re,max}}{Q_{re,mean}} \geq 0.5 \\ 4 \times \left(\frac{S_{re,max}}{Q_{re,mean}}\right)^2 \times C_{year} \times Q_{re,mean} + (1 - 4 \times \left(\frac{S_{re,max}}{Q_{re,mean}}\right)^2 \times Q_{iu,re}), & \frac{S_{re,max}}{Q_{re,mean}} < 0.5 \end{cases}$ <p>both reservoir types:</p> $C_{year} = \begin{cases} 0.1, & \text{filling phase for } S_{re} < (S_{re,max} \times 0.1) \\ \frac{S_{re}}{S_{re,max} \times 0.85}, & \text{not filling phase} \end{cases}$ <p>and <math>Q_{re} = \begin{cases} Q_{re}, &amp; S_{re} \geq S_{re,max} \times 0.85 \times 0.1 \\ Q_{re} \times 0.1, &amp; S_{re} &lt; S_{re,max} \times 0.85 \times 0.1 \end{cases}</math></p> |
| WAYS       | For details on the calculation of reservoir outflow please see [23] and [14]<br>not represented                                                                                                                                                                                                                                                                                                                                                                                                                                                                                                                                                                                                                                                                                                                                                                                                                                                                                                                                                                                                                                                                                                                                                                                                                                                                                                                                                                                                                  |



**Table S38.** Evaporation from reservoir ( $E_{re}$ )

| Model      | Equation                                                                      |
|------------|-------------------------------------------------------------------------------|
| CLM4.5     | not represented                                                               |
| CLM5.0     | not represented                                                               |
| CWatM      | $E_{re} = \min(S_{re}, E_{re,pot} - \min(P_{tot}, E_{re,pot}) \times B_{re})$ |
| DBH        | not represented                                                               |
| H08        | not represented                                                               |
| JULES-W1   | not represented                                                               |
| LPJmL      | $E_{re} = \min(S_{re}, E_{re,pot})$                                           |
| Mac-PDM.20 | not represented                                                               |
| MATSIRO    | not represented                                                               |
| mHM        | not represented                                                               |
| MPI-HM     | not represented                                                               |
| ORCHIDEE   | not represented                                                               |
| PCR-GLOBWB | $E_{re} = PET$                                                                |
| VIC        | not represented                                                               |
| WaterGAP2  | $E_{re} = PET$ with albedo = 0.08                                             |
| WAYS       | not represented                                                               |

**Table S39.** Wetland storage ( $S_{we}$ )

| Model      | Equation                                                                                                                                                                                                                                                                                                                                                                                                                                                                                                                                                                                                                                                                                                                                                                                                                                                                                                                                                                                                                                                                                                                                                                                                                                         | Water Flux                                          |                                                                |
|------------|--------------------------------------------------------------------------------------------------------------------------------------------------------------------------------------------------------------------------------------------------------------------------------------------------------------------------------------------------------------------------------------------------------------------------------------------------------------------------------------------------------------------------------------------------------------------------------------------------------------------------------------------------------------------------------------------------------------------------------------------------------------------------------------------------------------------------------------------------------------------------------------------------------------------------------------------------------------------------------------------------------------------------------------------------------------------------------------------------------------------------------------------------------------------------------------------------------------------------------------------------|-----------------------------------------------------|----------------------------------------------------------------|
|            |                                                                                                                                                                                                                                                                                                                                                                                                                                                                                                                                                                                                                                                                                                                                                                                                                                                                                                                                                                                                                                                                                                                                                                                                                                                  | Inflows                                             | Outflows                                                       |
| CLM4.5     | not represented                                                                                                                                                                                                                                                                                                                                                                                                                                                                                                                                                                                                                                                                                                                                                                                                                                                                                                                                                                                                                                                                                                                                                                                                                                  |                                                     |                                                                |
| CLM5.0     | not represented                                                                                                                                                                                                                                                                                                                                                                                                                                                                                                                                                                                                                                                                                                                                                                                                                                                                                                                                                                                                                                                                                                                                                                                                                                  |                                                     |                                                                |
| CWatM      | not represented                                                                                                                                                                                                                                                                                                                                                                                                                                                                                                                                                                                                                                                                                                                                                                                                                                                                                                                                                                                                                                                                                                                                                                                                                                  |                                                     |                                                                |
| DBH        | not represented                                                                                                                                                                                                                                                                                                                                                                                                                                                                                                                                                                                                                                                                                                                                                                                                                                                                                                                                                                                                                                                                                                                                                                                                                                  |                                                     |                                                                |
| H08        | not represented                                                                                                                                                                                                                                                                                                                                                                                                                                                                                                                                                                                                                                                                                                                                                                                                                                                                                                                                                                                                                                                                                                                                                                                                                                  |                                                     |                                                                |
| JULES-W1   | not represented                                                                                                                                                                                                                                                                                                                                                                                                                                                                                                                                                                                                                                                                                                                                                                                                                                                                                                                                                                                                                                                                                                                                                                                                                                  |                                                     |                                                                |
| LPJmL      | not represented                                                                                                                                                                                                                                                                                                                                                                                                                                                                                                                                                                                                                                                                                                                                                                                                                                                                                                                                                                                                                                                                                                                                                                                                                                  |                                                     |                                                                |
| Mac-PDM.20 | not represented                                                                                                                                                                                                                                                                                                                                                                                                                                                                                                                                                                                                                                                                                                                                                                                                                                                                                                                                                                                                                                                                                                                                                                                                                                  |                                                     |                                                                |
| MATSIRO    | not represented                                                                                                                                                                                                                                                                                                                                                                                                                                                                                                                                                                                                                                                                                                                                                                                                                                                                                                                                                                                                                                                                                                                                                                                                                                  |                                                     |                                                                |
| mHM        | not represented                                                                                                                                                                                                                                                                                                                                                                                                                                                                                                                                                                                                                                                                                                                                                                                                                                                                                                                                                                                                                                                                                                                                                                                                                                  |                                                     |                                                                |
| MPI-HM     | $\frac{\delta S_{we}}{\delta t} = f_{we} \times \left( P_{ra} + M - \frac{R_{gwr,max}}{10} \right) - E_{we} + Q_{iu,we,up} - Q_{we} - f_{irr} \times S_{we}$                                                                                                                                                                                                                                                                                                                                                                                                                                                                                                                                                                                                                                                                                                                                                                                                                                                                                                                                                                                                                                                                                     | $Q_{iu,we,up},$<br>$P_{ra}, M$                      | $R_{pe}, E_{we}, Q_{we}$                                       |
| ORCHIDEE   | not represented                                                                                                                                                                                                                                                                                                                                                                                                                                                                                                                                                                                                                                                                                                                                                                                                                                                                                                                                                                                                                                                                                                                                                                                                                                  |                                                     |                                                                |
| PCR-GLOBWB | not represented                                                                                                                                                                                                                                                                                                                                                                                                                                                                                                                                                                                                                                                                                                                                                                                                                                                                                                                                                                                                                                                                                                                                                                                                                                  |                                                     |                                                                |
| VIC        | not represented                                                                                                                                                                                                                                                                                                                                                                                                                                                                                                                                                                                                                                                                                                                                                                                                                                                                                                                                                                                                                                                                                                                                                                                                                                  |                                                     |                                                                |
| WaterGAP2  | WaterGAP2 has two types of representations of wetlands. Global wetlands are wetlands that receive inflow from the grid cell itself and the upstream grid cells, while local wetlands receive inflow only from the grid cell where have been identified.<br>$\frac{\delta S_{we,local}}{\delta t} = Q_{la,local} + B_{we,local} \times (P_{tot} - E_{we}) - R_{gwr}^{swb} - Q_{we,local}$<br>for $B_{we,local} = C_{B,red} \times B_{we,local,max}$<br>for $C_{B,red} = 1 - \left( \frac{ S_{we,local} - S_{we,local,max} }{S_{we,local,max}} \right)^{3.32}$<br>for $R_{gwr}^{swb} = \begin{cases} 0, & \text{for humid cell} \\ C_{gw,rech}^{sw} \times C_{B,red} \times B_{we,local}, & \text{for arid and semi-arid cells} \end{cases}$<br>$\frac{\delta S_{we,global}}{\delta t} = Q_{la,global} + Q_{re} + B_{we,global} \times (P_{tot} - E_{we}) - R_{gwr}^{swb} - Q_{we,global}$<br>for $B_{we,global} = C_{B,red} \times B_{we,global,max}$<br>for $C_{B,red} = 1 - \left( \frac{ S_{we,global} - S_{we,global,max} }{S_{we,global,max}} \right)^{3.32}$<br>for $R_{gwr}^{swb} = \begin{cases} 0, & \text{for humid cell} \\ C_{gw,rech}^{sw} \times C_{B,red} \times B_{we,global}, & \text{for arid and semi-arid cells} \end{cases}$ | $Q_{la,local}, P_{tot},$<br>$Q_{la,global}, Q_{re}$ | $E_{we}, R_{gwr}^{swb},$<br>$Q_{we,local},$<br>$Q_{we,global}$ |
| WAYS       | not represented                                                                                                                                                                                                                                                                                                                                                                                                                                                                                                                                                                                                                                                                                                                                                                                                                                                                                                                                                                                                                                                                                                                                                                                                                                  |                                                     |                                                                |

**Table S40.** Inflow from upstream grid cell for wetland storage ( $Q_{iu,we,up}$ )

| Model      | Equation                                                             |
|------------|----------------------------------------------------------------------|
| CLM4.5     | not represented                                                      |
| CLM5.0     | not represented                                                      |
| CWatM      | not represented                                                      |
| DBH        | not represented                                                      |
| H08        | not represented                                                      |
| JULES-W1   | not represented                                                      |
| LPJmL      | not represented                                                      |
| Mac-PDM.20 | not represented                                                      |
| MATSIRO    | not represented                                                      |
| mHM        | not represented                                                      |
| MPI-Hm     | $Q_{iu,we,up} = f_{we}^2 \times (Q_{rv,up} + R_{gw,up} + Q_{ri,up})$ |
| ORCHIDEE   | not represented                                                      |
| PCR-GLOBWB | not represented                                                      |
| VIC        | not represented                                                      |
| WaterGAP2  | not represented                                                      |
| WAYS       | not represented                                                      |

**Table S41.** Evaporation from wetland ( $E_{we}$ )

| Model      | Equation                          |
|------------|-----------------------------------|
| CLM4.5     | not represented                   |
| CLM5.0     | not represented                   |
| CWatM      | not represented                   |
| DBH        | not represented                   |
| H08        | not represented                   |
| JULES-W1   | not represented                   |
| LPJmL      | not represented                   |
| Mac-PDM.20 | not represented                   |
| MATSIRO    | not represented                   |
| mHM        | not represented                   |
| MPI-HM     | $E_{we} = PET \times f_{we}$      |
| ORCHIDEE   | not represented                   |
| PCR-GLOBWB | not represented                   |
| VIC        | not represented                   |
| WaterGAP2  | $E_{we} = PET$ with albedo = 0.08 |
| WAYS       | not represented                   |

**Table S42.** Outflow from wetland ( $Q_{we}$ )

| Model      | Equation                                                                                                                                                                                                           |
|------------|--------------------------------------------------------------------------------------------------------------------------------------------------------------------------------------------------------------------|
| CLM4.5     | not represented                                                                                                                                                                                                    |
| CLM5.0     | not represented                                                                                                                                                                                                    |
| CWatM      | not represented                                                                                                                                                                                                    |
| DBH        | not represented                                                                                                                                                                                                    |
| H08        | not represented                                                                                                                                                                                                    |
| JULES-W1   | not represented                                                                                                                                                                                                    |
| LPJmL      | not represented                                                                                                                                                                                                    |
| Mac-PDM.20 | not represented                                                                                                                                                                                                    |
| MATSIRO    | not represented                                                                                                                                                                                                    |
| mHM        | not represented                                                                                                                                                                                                    |
| MPI-Hm     | $Q_{we} = \frac{S_{we}}{t_{we}}$ $\text{for } t_{we} = \frac{l_{G,ri}}{C_{MS,we} \times h_{w,we}^{\frac{2}{3}} \times s_{we,mean}^{\frac{1}{2}}}$                                                                  |
| ORCHIDEE   | not represented                                                                                                                                                                                                    |
| PCR-GLOBWB | not represented                                                                                                                                                                                                    |
| VIC        | not represented                                                                                                                                                                                                    |
| WaterGAP2  | $Q_{we,local} = C_{sw,out} \times S_{we,local} \times \left(\frac{S_{we,local}}{S_{we,local,max}}\right)^{2.5}$ $Q_{we,global} = C_{sw,out} \times S_{we,global}$ <p>with <math>C_{sw,out} = 0.01d^{-1}</math></p> |
| WAYS       | not represented                                                                                                                                                                                                    |

**Table S43.** River storage ( $S_{ri}$ )

| Model      | Equation                                                                                                                                                                                                                                                                                                                                                                                                                                                                     | Water Flux                           |                                                                  |
|------------|------------------------------------------------------------------------------------------------------------------------------------------------------------------------------------------------------------------------------------------------------------------------------------------------------------------------------------------------------------------------------------------------------------------------------------------------------------------------------|--------------------------------------|------------------------------------------------------------------|
|            |                                                                                                                                                                                                                                                                                                                                                                                                                                                                              | Inflows                              | Outflows                                                         |
| CLM4.5     | $\frac{\delta S_{ri}}{\delta t} = Q_{iu} - Q_{ri} + R_{su,l}$                                                                                                                                                                                                                                                                                                                                                                                                                | $Q_{ri}$                             | $Q_{iu}$                                                         |
| CLM5.0     | $\frac{\delta S_{ri}}{\delta t} = Q_{iu} - Q_{ri} + R_{su,l}$                                                                                                                                                                                                                                                                                                                                                                                                                | $Q_{ri}$                             | $Q_{iu}$                                                         |
| CWatM      | $\frac{\delta S_{ri}}{\delta t} = R_{if} + R_{gw} + R_{su} + Q_{iu} - Q_{od} - A_{dom}^{sw} - A_{irr}^{sw} - A_{liv}^{sw} - A_{man}^{sw}$                                                                                                                                                                                                                                                                                                                                    |                                      |                                                                  |
| DBH        | not represented                                                                                                                                                                                                                                                                                                                                                                                                                                                              |                                      |                                                                  |
| H08        | $\frac{\delta S_{ri}}{\delta t} = Q_{ri} - Q_{iu}$ ; $Q_{iu}$ is modified if a reservoir is present. See [36]                                                                                                                                                                                                                                                                                                                                                                | $Q_{ri}$                             | $Q_{iu}$                                                         |
| JULES-W1   | not represented                                                                                                                                                                                                                                                                                                                                                                                                                                                              |                                      |                                                                  |
| LPJmL      | $\frac{\delta S_{ri}}{\delta t} = Q_{iu} - Q_{iu,la} - Q_{ri} - A_{act,irr}$                                                                                                                                                                                                                                                                                                                                                                                                 | $Q_{iu}$                             | $Q_{iu,la}, Q_{ri}, A_{act,irr}$                                 |
| Mac-PDM.20 | not represented                                                                                                                                                                                                                                                                                                                                                                                                                                                              |                                      |                                                                  |
| MATSIRO    | at a grid without reservoir<br>$\frac{\delta S_{ri}}{\delta t} = Q_{iu,re} - Q_{re}$<br>for $Q_{iu,re} = \frac{Q_{iu} + R_{tot}}{B_G}$<br>at a grid with reservoir<br>$\frac{\delta S_{ri}}{\delta t} = \frac{\delta S_{re,global}}{\delta t}$                                                                                                                                                                                                                               | $Q_{iu,re}, R_{tot}$                 | $Q_{iu}, Q_{re}$                                                 |
| mHM        | $\frac{\delta S_{ri}}{\delta t} = R_{tot} + Q_{iu} - Q_{ri}$                                                                                                                                                                                                                                                                                                                                                                                                                 | $Q_{iu}$                             | $Q_{ri}$                                                         |
| MPI-HM     | $\frac{\delta S_{ri,n}}{\delta t} = Q_{ri,n-1} - Q_{ri,n} - f_{irr} \times S_{ri,n}$<br>for $n = [1, \dots, 5]$ and $Q_{ri0} = Q_{iu}$<br>$Q_{ri,n} = \frac{S_{ri,n}}{\kappa_{ri}}$ for $n = [1, \dots, 5]$                                                                                                                                                                                                                                                                  | $Q_{iu}$                             | $Q_{ri}$                                                         |
| ORCHIDEE   | $\frac{\delta S_{ri,fast,i+1}}{\delta t} = S_{ri,fast,i} + R_{su} - \frac{S_{ri,fast,i}}{t_{ret} \times t_{ri,fast}}$<br>$\frac{\delta S_{ri,slow,i+1}}{\delta t} = S_{ri,slow,i} + R_{gw} - \frac{S_{ri,slow,i}}{t_{ret} \times t_{ri,slow}}$<br>$\frac{\delta S_{ri,stream,i+1}}{\delta t} = S_{ri,stream,i} + \frac{S_{ri,fast,i}}{t_{ret} \times t_{ri,fast}} + \frac{S_{ri,slow,i}}{t_{ret} \times t_{ri,slow}} - \frac{S_{ri,stream,i}}{t_{ret} \times t_{ri,stream}}$ | $R_{su}, R_{gw}$                     |                                                                  |
| PCR-GLOBWB | $\frac{\delta S_{ri}}{\delta t} = R_{if} + R_{gw} + R_{su} + Q_{iu} - Q_{od} - A_{dom}^{sw} - A_{irr}^{sw} - A_{liv}^{sw} - A_{man}^{sw}$                                                                                                                                                                                                                                                                                                                                    | $R_{if}, R_{gw}, R_{su}, Q_{iu}$     | $Q_{od}, A_{dom}^{sw}, A_{irr}^{sw}, A_{liv}^{sw}, A_{man}^{sw}$ |
| VIC        | not represented                                                                                                                                                                                                                                                                                                                                                                                                                                                              |                                      |                                                                  |
| WaterGAP2  | $\frac{\delta S_{ri}}{\delta t} = Q_{iu} + R_{su} \times (1 - f_{sub}) + R_{gw}^{ri} + A_{rf} - A_{ri} - Q_{ri}$<br>with $R_{gw}^{ri} = \begin{cases} R_{gw} & \text{arid and semi-arid cells} \\ R_{gw} \times (1 - f_{sub}) & \text{humid cells} \end{cases}$                                                                                                                                                                                                              | $Q_{we,global}, R_{su}, R_{gw}^{ri}$ | $A_{ri}, Q_{ri}$                                                 |
| WAYS       | not represented                                                                                                                                                                                                                                                                                                                                                                                                                                                              |                                      |                                                                  |

**Table S44.** Rivulet storage ( $S_{rv}$ )

| Model      | Equation                                                 | Water Flux      |          |
|------------|----------------------------------------------------------|-----------------|----------|
|            |                                                          | Inflows         | Outflows |
| CLM4.5     | not represented                                          |                 |          |
| CLM5.0     | not represented                                          |                 |          |
| CWatM      | $\frac{\delta S_{rv}}{\delta t} = R_{su_{LC,R}} - R_G^1$ | $R_{su_{LC,R}}$ | $R_G^1$  |
| DBH        | not represented                                          |                 |          |
| H08        | not represented                                          |                 |          |
| JULES-W1   | not represented                                          |                 |          |
| LPJmL      | not represented                                          |                 |          |
| Mac-PDM.20 | not represented                                          |                 |          |
| MATSIRO    | not represented                                          |                 |          |
| mHM        | not represented                                          |                 |          |
| MPI-HM     | $\frac{\delta S_{rv}}{\delta t} = R_{su} - R_G$          | $R_{su}$        | $R_G$    |
| ORCHIDEE   | not represented                                          |                 |          |
| PCR-GLOBWB | not represented                                          |                 |          |
| VIC        | not represented                                          |                 |          |
| Water-GAP2 | not represented                                          |                 |          |
| WAYS       | not represented                                          |                 |          |

**Table S45.** Inflow from upstream surface water bodies ( $Q_{iu}$ )

| Model      | Equation                                                                                                                                     |
|------------|----------------------------------------------------------------------------------------------------------------------------------------------|
| CLM4.5     | sum of inflows of water from neighboring upstream grid cells                                                                                 |
| CLM5.0     | sum of inflows of water from neighboring upstream grid cells                                                                                 |
| CWatM      | sum of inflows of water from neighboring upstream grid cells, lakes and reservoirs. Kinematic wave approach.                                 |
| DBH        | not represented                                                                                                                              |
| H08        | $Q_{iuG} = v \times S_{riG-1}$ for $v = 0.5$                                                                                                 |
| JULES-W1   | not represented                                                                                                                              |
| LPJmL      | $Q_{iu} = Q_{ri} - E_{la} - E_{re}$                                                                                                          |
| Mac-PDM.20 | not represented                                                                                                                              |
| MATSIRO    | $Q_{iu} = \sum_{upstreamG} \times Q_{ri}^{upstreamG}$                                                                                        |
| mHM        | sum of inflows of water from neighboring upstream grid cells                                                                                 |
| MPI-HM     | $Q_{iu} = R_{gw,up} + Q_{rv,up} + Q_{ri,up} - Q_{iu,we,up}$                                                                                  |
| ORCHIDEE   | $Q_{iu} = \sum \frac{S_{ri,stream,upper}}{t_{ret} \times t_{ri,stream}}$                                                                     |
| PCR-GLOBWB | $Q_{iu} = \frac{\delta Q_{ri}}{\delta t_{ri}} + C_{weir} \times C_{weir} \times Q_{ri}^{(C_{weir}-1)} \times \frac{\delta Q_{ri}}{\Delta t}$ |
| VIC        | not represented                                                                                                                              |
| WaterGAP2  | inflow from upstream grid cells is routed through global lakes see Table S32.                                                                |
| WAYS       | not represented                                                                                                                              |



**Table S46.** Streamflow ( $Q_{ri}$ )

| Model      | Equation                                                                                                                                                                                                                                                                                                                                                                                                                   |
|------------|----------------------------------------------------------------------------------------------------------------------------------------------------------------------------------------------------------------------------------------------------------------------------------------------------------------------------------------------------------------------------------------------------------------------------|
| CLM4.5     | $Q_{ri} = \frac{v}{l_G} \times S_{ri}$                                                                                                                                                                                                                                                                                                                                                                                     |
| CLM5.0     | $Q_{ri} = \frac{C_{ri,hydraulic}^{\frac{2}{3}} \times S_{ri}}{C_M}$                                                                                                                                                                                                                                                                                                                                                        |
| CWatM      | $\frac{\Delta t}{l_{ri}} \times Q_{ri}^{t+1} + \alpha \times (Q_{ri}^{t+1})^\beta = \frac{\Delta t}{l_{ri}} \times Q_{ri}^{t+1} + \alpha \times (Q_{ri}^t)^\beta + \Delta t \times \left( \frac{Q_{ri}^{t+1} + Q_{ri}^t}{2} \right)$<br>For each cell and for each time step using an iterative approach given in Chow et al. [9]. The coefficients can be calculated using Manning's equation.                            |
| DBH        | not represented                                                                                                                                                                                                                                                                                                                                                                                                            |
| H08        | $Q_{ri} = \sum R_{su} + Q_{iu}$<br>When a dam is present, outflow from dam is used, see Table 35.                                                                                                                                                                                                                                                                                                                          |
| JULES-W1   | not represented                                                                                                                                                                                                                                                                                                                                                                                                            |
| LPJmL      | $Q_{ri,out} = Q_{ri,in} \times \frac{1}{l \times \Gamma \times n} \times \frac{t^{(n-1)}}{l} \times e^{-\frac{t}{l}}$<br>for: $n = \frac{l_{ri}}{l_{ri,hom}}$ ; $l = \frac{l_{ri,hom}}{v_{mean}}$ ; $\Gamma$ = gamma function which allows for non-integer values of "n".                                                                                                                                                  |
| Mac-PDM.20 | not represented                                                                                                                                                                                                                                                                                                                                                                                                            |
| MATSIRO    | at a grid without reservoir<br>$Q_{ri,t} = (Q_{iu} + R_{tot}^*) - \frac{S_{ri,(t+\Delta t)} - S_{ri,t}}{\Delta t} \times B - (A_{irr}^{ri} + A_{dom}^{ri} + A_{ind}^{ri}) \times B$<br>A part of $R_{tot}$ flows into a pond and is stored in the pond, then $R_{tot}$ becomes $R_{tot}^*$ which = $Q_{re,local}$<br>at a grid with reservoir<br>$Q_{ri} = Q_{re} - (A_{irr}^{ri} + A_{dom}^{ri} + A_{ind}^{ri}) \times B$ |
| mHM        | $Q_{ri}^{t+1} = C_{M1} \times Q_{ri}^{t+1} + C_{M2} \times Q_{ri}^t + C_{M3} \times Q_{ri}^t$<br>for each cell $i$ and for each time step $t$ using an iterative approach given in Chow et al. [9]. The coefficients $C_{M1} - C_{M3}$ are fully derived in Thober et al. [50].                                                                                                                                            |
| MPI-HM     | $Q_{ri} = \frac{S_{ri,n}}{\kappa_{ri}^i}$ for $n = 5$                                                                                                                                                                                                                                                                                                                                                                      |
| ORCHIDEE   | $Q_{ri} = \frac{S_{ri,stream,i}}{t_{ret} \times t_{ri,stream}}$                                                                                                                                                                                                                                                                                                                                                            |
| PCR-GLOBWB | $Q_{ri} = \frac{\delta Q_{ri}}{\delta l_{ri}} + C_{weir} \times C_{weir} \times Q_{ri}^{(C_{weir}-1)} \times \frac{\delta Q_{ri}}{\Delta t}$                                                                                                                                                                                                                                                                               |
| VIC        | not represented                                                                                                                                                                                                                                                                                                                                                                                                            |
| WaterGAP2  | $Q_{ri} = \frac{v}{l_{ri}} \times S_{ri}$<br>for $v = C_M^{-1} \times C_{ri,hydraulic}^{\frac{2}{3}} \times S_{ri}^{\frac{1}{2}}$<br>for details see Verzano et al. [52]                                                                                                                                                                                                                                                   |
| WAYS       | not represented                                                                                                                                                                                                                                                                                                                                                                                                            |

**Table S47.** Evaporation from river ( $E_{ri}$ )

| Model      | Equation                                          |
|------------|---------------------------------------------------|
| CLM4.5     | not represented                                   |
| CLM5.0     | not represented                                   |
| CWatM      | $E_{ri} = E_{la,pot} - \min(P_{tot}, E_{la,pot})$ |
| DBH        | not represented                                   |
| H08        | not represented                                   |
| JULES-W1   | not represented                                   |
| LPJmL      | $E_{ri} = E_{la} = \min(S_{la}, E_{la,pot})$      |
| Mac-PDM.20 | not represented                                   |
| MATSIRO    | not represented                                   |
| mHM        | not represented                                   |
| MPI-HM     | not represented                                   |
| ORCHIDEE   | not represented                                   |
| PCR-GLOBWB | $E_{ri} = PET$                                    |
| VIC        | not represented                                   |
| WaterGAP2  | not represented                                   |
| WAYS       | not represented                                   |

**Table S48.** Minimum and Maximum values of each water storage Part I

| Water Storage       | CLM4.5          |                                                                                                                                                                    | CLM5.0          |                                                                                                                                                            | CWatM           |                                                                                                | DBH                                                                                       |                                                                                                                                                |
|---------------------|-----------------|--------------------------------------------------------------------------------------------------------------------------------------------------------------------|-----------------|------------------------------------------------------------------------------------------------------------------------------------------------------------|-----------------|------------------------------------------------------------------------------------------------|-------------------------------------------------------------------------------------------|------------------------------------------------------------------------------------------------------------------------------------------------|
|                     | Min             | Max                                                                                                                                                                | Min             | Max                                                                                                                                                        | Min             | Max                                                                                            | Min                                                                                       | Max                                                                                                                                            |
| Canopy storage      | 0               | depends on vegetation characteristics (> 20 PFT) and state (LAI)                                                                                                   | 0               | depends on vegetation characteristics (> 20 PFT) and state (LAI)                                                                                           | 0               | specific to each land cover class and time of the year                                         | 0                                                                                         | $(2 \times 10^{-4} \text{ and } 5 \times 10^{-4}) \times LAI$                                                                                  |
| Snow storage        | 0               | no upper limit                                                                                                                                                     | 0               | no upper limit                                                                                                                                             | 0               | no upper limit                                                                                 | $\begin{cases} 0, & \text{for canopy} \\ 0.002m, & \text{for ground surface} \end{cases}$ | $\begin{cases} 10^{-4} \times & \text{for canopy} \\ LAI \times & \\ f_{ca,ex}, & \\ \text{no limit}, & \text{for ground surface} \end{cases}$ |
| Soil storage        | 0               | 100%                                                                                                                                                               | 0               | 100%                                                                                                                                                       | 0               | (saturated soil layer water content - residual soil layer water content) x soil layer depth    | 0                                                                                         | 100%, absolute capacity is determined by soil properties                                                                                       |
| Groundwater storage | 0               | no upper limit the storage is forced constant (any imbalance between P and ET is compensated by an artificial runoff term, keeping lake depth at a constant value) | 0               | 4800mm the storage is forced constant (any imbalance between P and ET is compensated by an artificial runoff term, keeping lake depth at a constant value) | 0               | no upper limit                                                                                 | not represented                                                                           | not represented                                                                                                                                |
| Lake storage        | 0               | compensated by an artificial runoff term, keeping lake depth at a constant value)                                                                                  | 0               | compensated by an artificial runoff term, keeping lake depth at a constant value)                                                                          | 0               | no upper limit                                                                                 | not represented                                                                           | not represented                                                                                                                                |
| Wetland storage     | not represented | not represented                                                                                                                                                    | not represented | not represented                                                                                                                                            | not represented | not represented                                                                                | not represented                                                                           | not represented                                                                                                                                |
| Reservoir storage   | not represented | not represented                                                                                                                                                    | not represented | not represented                                                                                                                                            | 0               | defined for each reservoir, cannot be exceed because of included non damaging outflow function | 0                                                                                         | Reservoir storage capacity                                                                                                                     |
| River storage       | not represented | not represented                                                                                                                                                    | not represented | not represented                                                                                                                                            | 0               | no upper limit                                                                                 | 0                                                                                         | $\infty$                                                                                                                                       |

**Table S49.** Minimum and Maximum values of each water storage Part II

| Water Storage       | H08             |                 | JULES-W1                                                                                                                                                                                                                                                                                                                                                                                         |                                                                                                                                                                                                                                                                                                                     | LPJmL           |                                                                                                                                                                                                                                                                                                                                                                                                                                 | MATSIRO                                                                  |
|---------------------|-----------------|-----------------|--------------------------------------------------------------------------------------------------------------------------------------------------------------------------------------------------------------------------------------------------------------------------------------------------------------------------------------------------------------------------------------------------|---------------------------------------------------------------------------------------------------------------------------------------------------------------------------------------------------------------------------------------------------------------------------------------------------------------------|-----------------|---------------------------------------------------------------------------------------------------------------------------------------------------------------------------------------------------------------------------------------------------------------------------------------------------------------------------------------------------------------------------------------------------------------------------------|--------------------------------------------------------------------------|
|                     | Min             | Max             | Min                                                                                                                                                                                                                                                                                                                                                                                              | Max                                                                                                                                                                                                                                                                                                                 | Min             | Max                                                                                                                                                                                                                                                                                                                                                                                                                             |                                                                          |
| Canopy storage      | not represented | not represented | $S_{ca,min} = 0.5$                                                                                                                                                                                                                                                                                                                                                                               | $S_{ca,max} = S_{ca,min} + 0.05 \times LAI$ Minimum LAI permitted in calculation of the albedo in snow-free conditions is set to 0.5 m <sup>2</sup> /m <sup>2</sup> , maximum LAI value ranges between 1 and 5 depending on the plant functional type (PFT). [5]                                                    | 0               | $S_{ca,p}$ specific to each PFT, respectively, tropical and temperate trees 0.02, boreal trees 0.06, grasses 0.01. Canopy water storage is assumed to be the product of daily precipitation, leaf area index, and a PFT and CFT-specific parameter that approximates the leaf form of the PFTs and the precipitation regime (rainfall intensity) where they typically grow. The parameter is tabulated in Gerten et al. (2004). | not represented                                                          |
| Snow storage        | 0               | no upper limit  | 0                                                                                                                                                                                                                                                                                                                                                                                                | no upper limit                                                                                                                                                                                                                                                                                                      | 0 mm            | 20000 mm                                                                                                                                                                                                                                                                                                                                                                                                                        | not represented                                                          |
| Soil storage        | wilting point   | field capacity  | Depends on the soil type per grid cell. Defined per grid cell (0.5 degrees). Volumetric soil moisture content at the wilting point (m <sup>3</sup> water per m <sup>3</sup> soil) i.e. the point at which soil moisture stress completely prevents transpiration, ranges between 0 (for ice covered regions) and 0.263. The configuration uses soil data from the Harmonized World Soil Database | Depends on the soil type per grid cell. Defined per grid cell (0.5 degrees). The volumetric soil moisture content at saturation (m <sup>3</sup> water per m <sup>3</sup> soil) ranges between 0 (for ice covered regions) and 0.458. The configuration uses soil data from the Harmonized World Soil Database. [35] | 0               | $S_{so,sat,p}$ specific to soil type clay=0.468; silty clay=0.468; sandy clay=0.406; clay loam=0.465; silty clay loam=0.464; sandy clay loam=0.404; loam=0.439; silt loam=0.476; sandy loam=0.434; silt=0.476; loamy sand=0.421; sand=0.339; rock and ice=0.006.                                                                                                                                                                | Soil storage is constrained by soil layer thickness and porosity         |
| Groundwater storage | 0               | no upper limit  | not represented                                                                                                                                                                                                                                                                                                                                                                                  | not represented                                                                                                                                                                                                                                                                                                     | not represented | not represented                                                                                                                                                                                                                                                                                                                                                                                                                 | not represented                                                          |
| Lake storage        | not represented | not represented | not represented                                                                                                                                                                                                                                                                                                                                                                                  | not represented                                                                                                                                                                                                                                                                                                     | 0               | $f_{la} \times 5 \times G \times 1000$                                                                                                                                                                                                                                                                                                                                                                                          | not represented                                                          |
| Wetland storage     | not represented | not represented | not represented                                                                                                                                                                                                                                                                                                                                                                                  | not represented                                                                                                                                                                                                                                                                                                     | not represented | not represented                                                                                                                                                                                                                                                                                                                                                                                                                 | not represented                                                          |
| Reservoir storage   | 0               | dam capacity    | not represented                                                                                                                                                                                                                                                                                                                                                                                  | not represented                                                                                                                                                                                                                                                                                                     | 0               | Reservoir dependent, this is an input to the model                                                                                                                                                                                                                                                                                                                                                                              | Reservoir storage cannot exceed storage capacity specified in GRand data |
| River storage       | no limit        | no limit        | not represented                                                                                                                                                                                                                                                                                                                                                                                  | not represented                                                                                                                                                                                                                                                                                                     | 0               | no upper limit                                                                                                                                                                                                                                                                                                                                                                                                                  | not represented                                                          |

**Table S50.** Minimum and Maximum values of each water storage Part III

| Water Storage       | Mac-PDM.20      |                 | mHM             |                                                                               | MPI-HM |                                             | ORCHIDEE        |                                                                                                                                                                                                                                                     | PCR-GLOBWB |                              |
|---------------------|-----------------|-----------------|-----------------|-------------------------------------------------------------------------------|--------|---------------------------------------------|-----------------|-----------------------------------------------------------------------------------------------------------------------------------------------------------------------------------------------------------------------------------------------------|------------|------------------------------|
|                     | Min             | Max             | Min             | Max                                                                           | Min    | Max                                         | Min             | Max                                                                                                                                                                                                                                                 | Min        | Max                          |
| Canopy storage      | not represented | not represented | 0               | $P_{int,max} = 0.15 - 0.4mm$                                                  | 0      | no upper limit                              | 0               | $0.02 \times LAI \times f_{ca}$                                                                                                                                                                                                                     | 0          | no upper limit               |
| Snow storage        | 0               | no upper limit  | 0               | no upper limit                                                                | 0      | no upper limit                              | 0               | no upper limit                                                                                                                                                                                                                                      | 0          | no upper limit               |
| Soil storage        | 0               | no upper limit  | 0               | $\sum_{i=1}^N S_{so,max,i} d_{so,i}$ , where $N = 6$ is number of soil layers | 0      | $S_{so,max} = S_{so,TL} \times d_{so,root}$ | 0               | $S_{so,sat,p}$ specific to soil type ( $m^3 m^{-3}$ )<br>clay=0.3; silty clay=0.36; sandy clay=0.38; clay loam=0.41; silty clay loam=0.43; sandy clay loam=0.39; loam=0.43; silt loam=0.45; sandy loam=0.41; silt=0.46; loamy sand=0.41; sand=0.43. | 0          | porosity * layer depth       |
| Groundwater storage | 0               | no upper limit  | 0               | no upper limit                                                                | 0      | no upper limit                              | not represented | not represented                                                                                                                                                                                                                                     | 0          | no upper limit               |
| Lake storage        | not represented | not represented | not represented | not represented                                                               | 0      | no upper limit                              | not represented | not represented                                                                                                                                                                                                                                     | 0          | no upper limit               |
| Wetland storage     | represented     | represented     | not represented | not represented                                                               | 0      | no upper limit                              | represented     | represented                                                                                                                                                                                                                                         | 0          | no upper limit               |
| Reservoir storage   | not represented | not represented | not represented | not represented                                                               |        |                                             | not represented | not represented                                                                                                                                                                                                                                     | 0          | design capacity of reservoir |
| River storage       | not represented | not represented | 0               | no upper limit                                                                |        | not represented                             | 0               | no upper limit                                                                                                                                                                                                                                      | 0          | no upper limit               |

**Table S51.** Minimum and Maximum values of each water storage Part IV

| Water Storage       | VIC |                              | WaterGAP2                                   |                                                                                                                | WAYS |                 |
|---------------------|-----|------------------------------|---------------------------------------------|----------------------------------------------------------------------------------------------------------------|------|-----------------|
|                     | Min | Max                          | Min                                         | Max                                                                                                            | Min  | Max             |
| Canopy storage      | 0   | no upper limit               | 0                                           | $S_{ca,max} = 0.3 \times LAI$                                                                                  | 0    | $f(LAI_{max})$  |
| Snow storage        | 0   | no upper limit               | 0                                           | 1000 mm                                                                                                        | 0    | no upper limit  |
| Soil storage        | 0   | porosity * layer depth       | 0                                           | $S_{so,max}$                                                                                                   | 0    | $S_{rz,max}$    |
| Groundwater storage | 0   | no value                     | no limit                                    | no limit                                                                                                       | 0    | no upper limit  |
| Lake storage        | 0   | no upper limit               | $-S_{la,local,max}$<br>$-S_{la,global,max}$ | $S_{la,local,max} =$<br>$B_{la,local,max} \times 5m$<br>$S_{la,global,max} =$<br>$B_{la,global,max} \times 5m$ |      | not represented |
| Wetland storage     | 0   | no upper limit               | 0                                           | $S_{we,local,max} =$<br>$B_{we,local,max} \times 2m$<br>$S_{we,global,max} =$<br>$B_{we,global,max} \times 2m$ |      | not represented |
| Reservoir storage   | 0   | design capacity of reservoir | 0                                           | $S_{re,C} \times 0.85$                                                                                         |      | not represented |
| River storage       | 0   | no value                     | 0                                           | no limit                                                                                                       | 0    | no upper limit  |

**Table S52.** Irrigation water demand ( $A_{irr}$ )

| Model      | Equation                                                                                                                                                                                                                          |
|------------|-----------------------------------------------------------------------------------------------------------------------------------------------------------------------------------------------------------------------------------|
| CLM4.5     | $A_{irr} = j \times S_{so,sat} + (1 - j) \times S_{so,WP} - S_{so,cur}$                                                                                                                                                           |
| CLM5.0     | $A_{irr} = j \times S_{so,sat} + (1 - j) \times S_{so,WP} - S_{so,cur}$                                                                                                                                                           |
| CWatM      | $A_{irr} = A_{irr}^{gw} + A_{irr}^{sw}$                                                                                                                                                                                           |
| DBH        | not represented                                                                                                                                                                                                                   |
| H08        | $A_{irr} = A_{irr}^{gw} + A_{irr}^{sw}$                                                                                                                                                                                           |
| JULES-W1   | not represented                                                                                                                                                                                                                   |
| LPJmL      | $A_{irr} = A_{irr,net} + A_{irr,app}$<br>$A_{irr,net} = \max(0, S_{so,FC} - S_{so,ready})$<br>$A_{irr,app} = \max(0, (S_{so,sat} - S_{so,FC}) \times \lambda - S_{so,ready})$ , see [41]                                          |
| Mac-PDM.20 | not represented                                                                                                                                                                                                                   |
| MATSIRO    | $A_{irr} = \frac{\rho_w}{\Delta t} \times \sum_{i=1}^3 \max[(S_{so,t,i} - S_{so,a,i}), 0] \times \zeta_{so,i}$<br>$S_{so,t,i} = \alpha \times \phi_{so}$<br>$\alpha$ is set at 1 for rice and 0.75 for the other crops, see [38]. |
| mHM        | not represented                                                                                                                                                                                                                   |
| MPI-HM     | $A_{irr} = \left( T \times \frac{f_{ca} - f_{irr}}{f_{ca}} + PET \times f_{irr} \right) - T$<br>$f_{irr} = 1 - \frac{A_{irr}}{\sum S_i}$ ; for $i = \text{base flow, river, wetland}$                                             |
| ORCHIDEE   | not represented                                                                                                                                                                                                                   |
| PCR-GLOBWB | $A_{irr} = A_{irr}^{gw} + A_{irr}^{sw}$                                                                                                                                                                                           |
| VIC        | not represented                                                                                                                                                                                                                   |
| WaterGAP2  | $A_{irr} = A_{irr}^{gw} + A_{irr}^{sw}$                                                                                                                                                                                           |
| WAYS       | not represented                                                                                                                                                                                                                   |

**Table S53.** Irrigation groundwater abstraction ( $A_{irr}^{gw}$ )

| Model      | Equation                                                                                                                                                                                                                                                                                                                                                                                  |
|------------|-------------------------------------------------------------------------------------------------------------------------------------------------------------------------------------------------------------------------------------------------------------------------------------------------------------------------------------------------------------------------------------------|
| CLM4.5     | not represented                                                                                                                                                                                                                                                                                                                                                                           |
| CLM5.0     | not represented                                                                                                                                                                                                                                                                                                                                                                           |
| CWatM      | $A_{pot}^{gw} = A_{tot} - A_{act}^{sw}$ $A_{act}^{gw} = \min(S_{gw} - A_{pot}^{gw})$ $A_{fgw} = A_{pot}^{gw} - A_{act}^{gw}$                                                                                                                                                                                                                                                              |
| DBH        | not represented                                                                                                                                                                                                                                                                                                                                                                           |
| H08        | $A_{irr}^{gw} = A_{irr}^{gw,rw} + A_{irr}^{gw,nrw}$ $A_{irr}^{gw,rw} = \min(f_{gw,use} \times A_{irr,dem} \times \frac{S_{gw,rw}}{\Delta t})$ $A_{irr}^{gw,nrw} = f_{gw,use} \times A_{irr,dem} - A_{gw,rw}$                                                                                                                                                                              |
| JULES-W1   | not represented                                                                                                                                                                                                                                                                                                                                                                           |
| LPJmL      | not represented                                                                                                                                                                                                                                                                                                                                                                           |
| Mac-PDM.20 | not represented                                                                                                                                                                                                                                                                                                                                                                           |
| MATSIRO    | <p>Given the amount of water requirement for irrigation, water is firstly taken from local river flow (potentially regulated by global reservoir), then from local reservoir (same cell or upstream cell). Then, rest of water requirement unmet is taken from groundwater resource. Here MATSIRO assumes unlimited groundwater resource.</p> $A_{irr}^{gw} = A_{irr,dem} - A_{irr}^{sw}$ |
| mHM        | not represented                                                                                                                                                                                                                                                                                                                                                                           |
| MPI-HM     | $A_{irr}^{gw} = f_{irr} \times S_{gw}$                                                                                                                                                                                                                                                                                                                                                    |
| ORCHIDEE   | not represented                                                                                                                                                                                                                                                                                                                                                                           |
| PCR-GLOBWB | $A_{pot}^{gw} = A_{tot} - A_{act}^{sw}$ $A_{act}^{gw} = \min(S_{gw} - A_{pot}^{gw})$ $A_{fgw} = A_{pot}^{gw} - A_{act}^{gw}$                                                                                                                                                                                                                                                              |
| VIC        | not represented                                                                                                                                                                                                                                                                                                                                                                           |
| WaterGAP2  | $A_{irr}^{gw} = \frac{A_{irr,cons}}{0.7} \times f_{gw,use}$ <p><math>A_{irr,cons}</math> is calculated with a Global Irrigation Model, see [34] and [12].</p>                                                                                                                                                                                                                             |
| WAYS       | not represented                                                                                                                                                                                                                                                                                                                                                                           |



**Table S54.** Irrigation groundwater consumption ( $A_{irr,cons}^{gw}$ )

| Model      | Equation                                                                                                                                                                                           |
|------------|----------------------------------------------------------------------------------------------------------------------------------------------------------------------------------------------------|
| CLM4.5     | not represented                                                                                                                                                                                    |
| CLM5.0     | not represented                                                                                                                                                                                    |
| CWatM      | $A_{gw,cons} = A_{tot,cons} - A_{sw,cons}$                                                                                                                                                         |
| DBH        | not represented                                                                                                                                                                                    |
| H08        | $A_{irr,cons}^{gw} = f_{cons,A} \times A_{irr}^{gw}$                                                                                                                                               |
| JULES-W1   | not represented                                                                                                                                                                                    |
| LPJmL      | not represented                                                                                                                                                                                    |
| Mac-PDM.20 | not represented                                                                                                                                                                                    |
| MATSIRO    | Theoretically speaking, $A_{irr,cons}^{gw} = X \times A_{irr}^{gw}$ where $X$ is overall irrigation efficiency (which does not consider combinations of irrigation system type and water sources.) |
| mHM        | not represented                                                                                                                                                                                    |
| MPI-HM     | no water losses are computed                                                                                                                                                                       |
| ORCHIDEE   | not represented                                                                                                                                                                                    |
| PCR-GLOBWB | $A_{irr,cons}^{gw} = \frac{R_{gw}}{R_{gw} + Q_{iu}} \times A_{irr} \times X$                                                                                                                       |
| VIC        | not represented                                                                                                                                                                                    |
| WaterGAP2  | $A_{irr,cons}^{gw} = A_{irr,cons} \times f_{gw,use}$ $A_{irr,cons}$ is calculated with a Global Irrigation Model, see [34] and [12].                                                               |
| WAYS       | not represented                                                                                                                                                                                    |

**Table S55.** Return flow from irrigation groundwater abstraction ( $A_{irr,rf}^{gw}$ )

| Model      | Equation                                                                                                                                                                                                                                                                                                                                                                                                |
|------------|---------------------------------------------------------------------------------------------------------------------------------------------------------------------------------------------------------------------------------------------------------------------------------------------------------------------------------------------------------------------------------------------------------|
| CLM4.5     | not represented                                                                                                                                                                                                                                                                                                                                                                                         |
| CLM5.0     | not represented                                                                                                                                                                                                                                                                                                                                                                                         |
| CWatM      | $A_{irr,rf} = f_{irr,eff} \times A_{irr}$ , See [12]<br>$A_{irr,rf,filtr} = A_{irr} - A_{irr,cons}$                                                                                                                                                                                                                                                                                                     |
| DBH        | not represented                                                                                                                                                                                                                                                                                                                                                                                         |
| H08        | $A_{irr,rf}^{gw} = (1 - f_{lost}) \times (1 - f_{cons,A}) \times A_{irr}^{gw}$ [24]                                                                                                                                                                                                                                                                                                                     |
| JULES-W1   | not represented                                                                                                                                                                                                                                                                                                                                                                                         |
| LPJmL      | not represented                                                                                                                                                                                                                                                                                                                                                                                         |
| Mac-PDM.20 | not represented                                                                                                                                                                                                                                                                                                                                                                                         |
| MATSIRO    | In MATSIRO, return flow is implicitly accounted for.<br>MATSIRO estimates potential irrigation water amount to keep soil moisture at the target level of 0.75. Irrigation water added, added as sprinkler irrigation, can percolate into deeper layers, ultimately recharging groundwater, or contribute to local runoff depending on the rate of consumptive use by crops and soil wetness conditions. |
| mHM        | not represented                                                                                                                                                                                                                                                                                                                                                                                         |
| MPI-HM     | not represented                                                                                                                                                                                                                                                                                                                                                                                         |
| ORCHIDEE   | not represented                                                                                                                                                                                                                                                                                                                                                                                         |
| PCR-GLOBWB | $A_{irr,rf}^{gw} = \frac{R_{gw}}{R_{gw} + Q_{iu}} \times A_{irr} \times (1 - X)$                                                                                                                                                                                                                                                                                                                        |
| VIC        | not represented                                                                                                                                                                                                                                                                                                                                                                                         |
| WaterGAP2  | $A_{irr,rf}^{gw} = A_{irr}^{gw} - A_{irr,cons}^{gw}$                                                                                                                                                                                                                                                                                                                                                    |
| WAYS       | not represented                                                                                                                                                                                                                                                                                                                                                                                         |

**Table S56.** Irrigation surface water abstraction ( $A_{irr}^{sw}$ )

| Model      | Equation                                                                                                                                                                                                                                                                                                                                                                                             |
|------------|------------------------------------------------------------------------------------------------------------------------------------------------------------------------------------------------------------------------------------------------------------------------------------------------------------------------------------------------------------------------------------------------------|
| CLM4.5     | $A_{irr}^{sw} = A_{irr}$                                                                                                                                                                                                                                                                                                                                                                             |
| CLM5.0     | $A_{irr}^{sw} = A_{irr}$                                                                                                                                                                                                                                                                                                                                                                             |
| CWatM      | $A_{irr}^{sw} = \frac{A_{irr,cons}}{f_{irr,eff}}$<br>$f_{irr,eff}$ : see [46].<br>It also simulates overflow of the flooded topsoil for paddy rice land use. This saturation excess it is not controlled by soil hydraulic properties, but by human intervention.<br>$R_{of} = \max(0, S_{paddy} - 0.05 \text{ m})$ ; $S_{paddy}$ = the storage of flooded paddy rice (only for paddy rice land use) |
| DBH        | not represented                                                                                                                                                                                                                                                                                                                                                                                      |
| H08        | $A_{irr}^{sw} = A_{irr}^{aq} + A_{irr}^{re} + A_{irr}^{ri} + A_{irr}^{usw}$                                                                                                                                                                                                                                                                                                                          |
| JULES-W1   | not represented                                                                                                                                                                                                                                                                                                                                                                                      |
| LPJmL      | $A_{irr}^{sw} = A_{irr}^{la} + A_{irr}^{neigh,cell} + A_{irr}^{re} + A_{irr}^{ri}$                                                                                                                                                                                                                                                                                                                   |
| Mac-PDM.20 | not represented                                                                                                                                                                                                                                                                                                                                                                                      |
| MATSIRO    | Given the amount of water requirement for this sector, water is firstly taken from local river flow (potentially regulated by global reservoir), then from local reservoir (same cell or upstream cell).<br>$A_{irr}^{sw} = A_{irr}^{pond} + A_{irr}^{re,global} + A_{irr}^{ri}$                                                                                                                     |
| mHM        | not represented                                                                                                                                                                                                                                                                                                                                                                                      |
| MPI-HM     | $A_{irr}^{sw} = \sum_{n=1}^5 (f_{irr} \times S_{ri,n}) + f_{irr} \times S_{we}$                                                                                                                                                                                                                                                                                                                      |
| ORCHIDEE   | not represented                                                                                                                                                                                                                                                                                                                                                                                      |
| PCR-GLOBWB | $A_{irr}^{sw} = \frac{Q_{iu}}{R_{gw} + Q_{iu}} \times A_{irr}$                                                                                                                                                                                                                                                                                                                                       |
| VIC        | not represented                                                                                                                                                                                                                                                                                                                                                                                      |
| WaterGAP2  | $A_{irr}^{sw} = \frac{A_{irr,cons}}{f_{irr,sw,eff}} \times (1 - f_{gw,use})$ $A_{irr,cons}$ is calculated with a Global Irrigation Model, see [34] and [12].                                                                                                                                                                                                                                         |
| WAYS       | not represented                                                                                                                                                                                                                                                                                                                                                                                      |

**Table S57.** Irrigation surface water consumption ( $A_{irr,cons}^{sw}$ )

| Model      | Equation                                                                                                                                                                                                                                                                                                                                                                                                                                                                                                                                                                                 |
|------------|------------------------------------------------------------------------------------------------------------------------------------------------------------------------------------------------------------------------------------------------------------------------------------------------------------------------------------------------------------------------------------------------------------------------------------------------------------------------------------------------------------------------------------------------------------------------------------------|
| CLM4.5     | $A_{irr,cons}^{sw} = A_{irr}^{sw} - A_{irr,rf}^{sw}$                                                                                                                                                                                                                                                                                                                                                                                                                                                                                                                                     |
| CLM5.0     | $A_{irr,cons}^{sw} = A_{irr}^{sw} - A_{irr,rf}^{sw}$                                                                                                                                                                                                                                                                                                                                                                                                                                                                                                                                     |
| CWatM      | <p>For paddy irrigation:</p> $A_{irr,cons} = (d_{paddy,max}^{sw} - (d_{paddy}^{sw\ t-1} - P_{eff}^t))$ $d_{paddy}^{sw\ t} = d_{paddy}^{sw\ t-1} + P_{eff}^t + A_{irr} + R_{in} - E_{osw}^{d,t}$ <p>For non paddy:</p> $A_{irr,cons} = \begin{cases} S_{so,T2L} - S_{so,ready} & (S_{so,ready} < S_{so,crit}) \\ 0 & (S_{so,ready} \geq S_{so,crit}) \end{cases}$ $S_{so,T2L} = S_{so,FC} - S_{so,WP}$ $S_{so,ready} = S_{so} - S_{so,WP}$ $S_{so,crit} = (1 - p) \times S_{so,T2L} + S_{so,WP}$ $p = \frac{1}{(0.76 + 1.5 \times PET)} - 0.4 + \frac{(PET - 0.6)}{4}, \text{ see [51].}$ |
| DBH        | not represented                                                                                                                                                                                                                                                                                                                                                                                                                                                                                                                                                                          |
| H08        | $A_{irr}^{sw} = A_{irr,cons}^{sw} + A_{irr,loss}^{sw} + A_{irr,rf}^{sw}$ $A_{irr,cons}^{sw} = f_{cons,A} \times A_{irr}^{sw}$ $A_{irr,loss}^{sw} = f_{lost} \times (1 - f_{cons,A}) \times A_{irr}^{sw}$                                                                                                                                                                                                                                                                                                                                                                                 |
| JULES-W1   | not represented                                                                                                                                                                                                                                                                                                                                                                                                                                                                                                                                                                          |
| LPJmL      | $A_{irr,cons}^{sw} = \frac{A_{irr,net} + A_{irr,app} - S_{buf}}{X_{conv}}, X_{conv} = 0.95, \text{ see [7] and Table S52.}$                                                                                                                                                                                                                                                                                                                                                                                                                                                              |
| Mac-PDM.20 | not represented                                                                                                                                                                                                                                                                                                                                                                                                                                                                                                                                                                          |
| MATSIRO    | Theoretically speaking, $A_{irr,cons}^{sw} = X \times A_{irr}^{sw}$                                                                                                                                                                                                                                                                                                                                                                                                                                                                                                                      |
| mHM        | not represented                                                                                                                                                                                                                                                                                                                                                                                                                                                                                                                                                                          |
| MPI-HM     | not represented                                                                                                                                                                                                                                                                                                                                                                                                                                                                                                                                                                          |
| ORCHIDEE   | not represented                                                                                                                                                                                                                                                                                                                                                                                                                                                                                                                                                                          |
| PCR-GLOBWB | $A_{irr,cons}^{sw} = \frac{Q_{iu}}{R_{gw} + Q_{iu}} \times A_{irr}$                                                                                                                                                                                                                                                                                                                                                                                                                                                                                                                      |
| VIC        | not represented                                                                                                                                                                                                                                                                                                                                                                                                                                                                                                                                                                          |
| WaterGAP2  | $A_{irr,cons}^{sw} = A_{irr,cons} \times (1 - f_{gw,use})$                                                                                                                                                                                                                                                                                                                                                                                                                                                                                                                               |
| WAYS       | $A_{irr,cons}$ is calculated with a Global Irrigation Model, see [34] and [12].<br>not represented                                                                                                                                                                                                                                                                                                                                                                                                                                                                                       |

**Table S58.** Return flow from irrigation surface water abstraction ( $A_{irr,rf}^{sw}$ )

| Model      | Equation                                                                                                                                                                         |
|------------|----------------------------------------------------------------------------------------------------------------------------------------------------------------------------------|
| CLM4.5     | $A_{irr,rf}^{sw} = f_{G,sat} \times A_{irr}^{sw}$                                                                                                                                |
| CLM5.0     | $A_{irr,rf}^{sw} = f_{G,sat} \times A_{irr}^{sw}$                                                                                                                                |
| CWatM      | $A_{irr,rf}^{sw} = f_{irr,eff} \times A_{irr}$ , See [12]                                                                                                                        |
| DBH        | not represented                                                                                                                                                                  |
| H08        | $A_{irr,rf}^{sw} = (1 - f_{lost}) \times (1 - f_{cons,A}) \times A_{irr}^{sw}$ . See [12], [24]                                                                                  |
| JULES-W1   | not represented                                                                                                                                                                  |
| LPJmL      | $A_{irr,rf}^{sw} = A_{irr,cons}^{sw} - A_{irr,net} - A_{irr,app}$<br>Where: $E_{osw} = (-A_{irr,net} - A_{irr,app}) \times 0.5$                                                  |
| Mac-PDM.20 | not represented                                                                                                                                                                  |
| MATSIRO    | Return flow from irrigation using surface water is not separately estimated in MATSIRO; this component is a part of the return flow from the total water use within a grid cell. |
| mHM        | not represented                                                                                                                                                                  |
| MPI-HM     | not represented                                                                                                                                                                  |
| ORCHIDEE   | not represented                                                                                                                                                                  |
| PCR-GLOBWB | not represented                                                                                                                                                                  |
| VIC        | not represented                                                                                                                                                                  |
| WaterGAP2  | $A_{irr,rf}^{sw} = A_{irr}^{sw} - A_{irr,cons}^{sw}$                                                                                                                             |
| WAYS       | not represented                                                                                                                                                                  |

**Table S59.** Equations for domestic groundwater abstraction ( $A_{dom}^{gw}$ )

| Model                                                       | Equation                                                                                                                                                                                                                 |
|-------------------------------------------------------------|--------------------------------------------------------------------------------------------------------------------------------------------------------------------------------------------------------------------------|
| CLM4.5                                                      | not represented                                                                                                                                                                                                          |
| CLM5.0                                                      | not represented                                                                                                                                                                                                          |
| CWatM                                                       | $A_{tot}^{gw} = (1 - f_A^{sw}) \times (A_{irr} + A_{ind} + A_{dom} + A_{liv})$<br>CWatm only calculates total abstraction from groundwater or surface.<br>$f_A^{sw} = \frac{R_{su}}{R_{su} + R_{gw}}$                    |
| DBH                                                         | not represented                                                                                                                                                                                                          |
| H08                                                         | $A_{dom}^{gw} = A_{dom}^{gw,rw} + A_{dom}^{gw,nrw}$<br>$A_{dom}^{gw,rw} = \min(f_{gw,use} \times A_{dom,dem} \times \frac{S_{gw,rw}}{\Delta t})$<br>$A_{dom}^{gw,nrw} = f_{gw,use} \times A_{dom,dem} - A_{dom}^{gw,rw}$ |
| JULES-W1                                                    | not represented                                                                                                                                                                                                          |
| LPJmL                                                       | prescribed data offered by ISIMIP2b framework                                                                                                                                                                            |
| Mac-PDM.20                                                  | not represented                                                                                                                                                                                                          |
| MATSIRO                                                     | Given the amount of water requirement from the domestic sector, water is firstly taken from local river flow (potentially regulated by g<br>$A_{dom}^{gw} = A_{dom,dem} - A_{dom}^{sw}$                                  |
| where $A_{dom,dem}$ is domestic sectoral water requirement. |                                                                                                                                                                                                                          |
| mHM                                                         | not represented                                                                                                                                                                                                          |
| MPI-HM                                                      | not represented                                                                                                                                                                                                          |
| ORCHIDEE                                                    | not represented                                                                                                                                                                                                          |
| PCR-GLOBWB                                                  | $A_{dom}^{gw} = \frac{R_{gw}}{R_{gw} + Q_{iu}} \times A_{dom,dem}$                                                                                                                                                       |
| VIC                                                         | not represented                                                                                                                                                                                                          |
| WaterGAP2                                                   | $A_{dom}^{gw} = A_{dom} \times f_{gw,use}$<br>$A_{dom} = C_{dom}^{wu,ints} \times POP$<br>for $C_{dom}^{wu,ints}$ see [18].                                                                                              |
| WAYS                                                        | not represented                                                                                                                                                                                                          |

**Table S60.** Equations for domestic groundwater consumption ( $A_{dom,cons}^{gw}$ )

| Model      | Equation                                                                                                                                                                                                                                                             |
|------------|----------------------------------------------------------------------------------------------------------------------------------------------------------------------------------------------------------------------------------------------------------------------|
| CLM4.5     | not represented                                                                                                                                                                                                                                                      |
| CLM5.0     | not represented                                                                                                                                                                                                                                                      |
| CWatM      | $A_{tot,cons}^{gw} = (1 - f_A^{sw}) \times (A_{irr,cons} + A_{ind,cons} + A_{dom,cons} + A_{liv})$                                                                                                                                                                   |
| DBH        | not represented                                                                                                                                                                                                                                                      |
| H08        | $A_{dom}^{gw} = A_{dom,cons}^{gw} + A_{dom,loss}^{gw} + A_{dom,rf}^{gw}$<br>$A_{dom,cons}^{gw} = f_{cons,A} \times A_{dom}^{gw}$<br>$A_{dom,loss}^{gw} = f_{lost} \times (1 - f_{cons,A}) \times A_{dom}^{gw}$                                                       |
| JULES-W1   | not represented                                                                                                                                                                                                                                                      |
| LPJmL      | prescribed data offered by ISIMP2b                                                                                                                                                                                                                                   |
| Mac-PDM.20 | not represented                                                                                                                                                                                                                                                      |
| MATSIRO    | only 10 % of domestic water use is assumed to be consumptively used.<br>Theoretically speaking:<br>$A_{dom,cons}^{gw} = X_{dom} \times A_{dom}^{gw}$                                                                                                                 |
| mHM        | not represented                                                                                                                                                                                                                                                      |
| MPI-HM     | not represented                                                                                                                                                                                                                                                      |
| ORCHIDEE   | not represented                                                                                                                                                                                                                                                      |
| PCR-GLOBWB | $A_{dom,cons}^{gw} = \frac{R_{gw}}{R_{gw} + Q_{iu}} \times \frac{A_{dom,cons}}{A_{dom,dem}}$                                                                                                                                                                         |
| VIC        | not represented                                                                                                                                                                                                                                                      |
| WaterGAP2  | $A_{dom,cons}^{gw} = A_{dom,cons} \times f_{gw,use}$<br>$A_{dom,cons} = \begin{cases} A_{dom} \times C_{dom,cons}, & year < 2000 \\ A_{dom} - A_{dom,rf}, & year \geq 2000 \end{cases}$<br>Starting with 2000 $A_{dom,cons}$ is based on return flow data, see [18]. |
| WAYS       | not represented                                                                                                                                                                                                                                                      |

**Table S61.** Equations for return flow from domestic groundwater abstraction ( $A_{dom,rf}^{gw}$ )

| Model      | Equation                                                                                                                                                                                                                                                              |
|------------|-----------------------------------------------------------------------------------------------------------------------------------------------------------------------------------------------------------------------------------------------------------------------|
| CLM4.5     | not represented                                                                                                                                                                                                                                                       |
| CLM5.0     | not represented                                                                                                                                                                                                                                                       |
| CWatM      | It computes only total return flow from non-irrigated water abstractions.<br>$A_{rf,nonirr} = (1 - f_{lost}) \times (A_{ind} + A_{dom} - (A_{ind,cons} + A_{dom,cons}))$<br>$A_{rf,nonirr,eva} = f_{lost} \times (A_{ind} + A_{dom} - (A_{ind,cons} + A_{dom,cons}))$ |
| DBH        | not represented                                                                                                                                                                                                                                                       |
| H08        | $A_{dom,rf}^{gw} = (1 - f_{lost}) \times (1 - f_{cons,A}) \times A_{dom}^{gw}$ , see [24]                                                                                                                                                                             |
| JULES-W1   | not represented                                                                                                                                                                                                                                                       |
| LPJmL      | not represented                                                                                                                                                                                                                                                       |
| Mac-PDM.20 | not represented                                                                                                                                                                                                                                                       |
| MATSIRO    | 90 % of domestic water use is implicitly assumed to have returned to the original source (groundwater; see [39]).                                                                                                                                                     |
| mHM        | not represented                                                                                                                                                                                                                                                       |
| MPI-HM     | not represented                                                                                                                                                                                                                                                       |
| ORCHIDEE   | not represented                                                                                                                                                                                                                                                       |
| PCR-GLOBWB | $A_{dom,rf}^{gw} = \frac{R_{gw}}{R_{gw} + Q_{iu}} \times \frac{A_{dom,dem} - A_{dom,cons}}{A_{dom,dem}}$                                                                                                                                                              |
| VIC        | not represented                                                                                                                                                                                                                                                       |
| WaterGAP2  | $A_{dom,rf}^{gw} = A_{dom,rf} \times f_{gw,use}$<br>$A_{dom,rf} = \begin{cases} A_{dom} - (A_{dom} \times C_{dom,cons}) & year < 2000 \\ A_{dom,rf} & year \geq 2000 \end{cases}$<br>Starting with 2000 $A_{dom,rf}$ is based on wastewater volume data, see [18].    |
| WAYS       | not represented                                                                                                                                                                                                                                                       |



**Table S62.** Equations for domestic surface water abstraction ( $A_{dom}^{sw}$ )

| Model      | Equation                                                                                                                                                                                                                                                                         |
|------------|----------------------------------------------------------------------------------------------------------------------------------------------------------------------------------------------------------------------------------------------------------------------------------|
| CLM4.5     | not represented                                                                                                                                                                                                                                                                  |
| CLM5.0     | not represented                                                                                                                                                                                                                                                                  |
| CWatM      | $A_{tot}^{sw} = f_A^{sw} \times (A_{irr} + A_{ind} + A_{dom} + A_{liv})$                                                                                                                                                                                                         |
| DBH        | not represented                                                                                                                                                                                                                                                                  |
| H08        | $A_{dom}^{sw} = A_{dom}^{aq} + A_{dom}^{re} + A_{dom}^{ri} + A_{dom}^{usw}$                                                                                                                                                                                                      |
| JULES-W1   | not represented                                                                                                                                                                                                                                                                  |
| LPJmL      | prescribed data offered by ISIMIP2b                                                                                                                                                                                                                                              |
| Mac-PDM.20 | not represented                                                                                                                                                                                                                                                                  |
| MATSIRO    | Given the amount of water requirement for this sector, water is firstly taken from local river flow (potentially regulated by global reservoir), then from local reservoir (same cell or upstream cell).<br>$A_{dom}^{sw} = A_{dom}^{pond} + A_{dom}^{re,global} + A_{dom}^{ri}$ |
| mHM        | not represented                                                                                                                                                                                                                                                                  |
| MPI-HM     | not represented                                                                                                                                                                                                                                                                  |
| ORCHIDEE   | not represented                                                                                                                                                                                                                                                                  |
| PCR-GLOBWB | $A_{dom}^{sw} = \frac{Q_{iu}}{R_{gw} + Q_{iu}} \times A_{dom,dem}$                                                                                                                                                                                                               |
| VIC        | not represented                                                                                                                                                                                                                                                                  |
| WaterGAP2  | $A_{dom}^{sw} = A_{dom} \times (1 - f_{gw,use})$<br>$A_{dom} = C_{dom}^{wu,ints} \times POP$<br>for $C_{dom}^{wu,ints}$ see [18].                                                                                                                                                |
| WAYS       | not represented                                                                                                                                                                                                                                                                  |

**Table S63.** Equations for domestic surface water consumption ( $A_{dom,cons}^{sw}$ )

| Model      | Equation                                                                                                                                                                                                                                                                                   |
|------------|--------------------------------------------------------------------------------------------------------------------------------------------------------------------------------------------------------------------------------------------------------------------------------------------|
| CLM4.5     | not represented                                                                                                                                                                                                                                                                            |
| CLM5.0     | not represented                                                                                                                                                                                                                                                                            |
| CWatM      | $A_{tot,cons}^{sw} = f_A^{sw} \times (A_{irr,cons} + A_{ind,cons} + A_{dom,cons} + A_{liv})$                                                                                                                                                                                               |
| DBH        | not represented                                                                                                                                                                                                                                                                            |
| H08        | $A_{dom}^{sw} = A_{dom,cons}^{sw} + A_{dom,loss}^{sw} + A_{dom,rf}^{sw}$<br>$A_{dom,cons}^{sw} = f_{cons,A} \times A_{dom}^{sw}$ , see [12]<br>$A_{dom,loss}^{sw} = f_{lost} \times (1 - f_{cons,A}) \times A_{dom}^{sw}$                                                                  |
| JULES-W1   | not represented                                                                                                                                                                                                                                                                            |
| LPJmL      | prescribed data offered by ISIMIP2b                                                                                                                                                                                                                                                        |
| Mac-PDM.20 | not represented                                                                                                                                                                                                                                                                            |
| MATSIRO    | only 10 % of domestic water use, from surface water bodies, is assumed to be consumptively used. Theoretically speaking: $A_{dom,cons}^{sw} = X_{dom} \times A_{dom}^{sw}$                                                                                                                 |
| mHM        | not represented                                                                                                                                                                                                                                                                            |
| MPI-HM     | not represented                                                                                                                                                                                                                                                                            |
| ORCHIDEE   | not represented                                                                                                                                                                                                                                                                            |
| PCR-GLOBWB | $A_{dom,cons}^{sw} = \frac{Q_{iu}}{R_{gw} + Q_{iu}} \times \frac{A_{dom,cons}}{A_{dom,dem}}$                                                                                                                                                                                               |
| VIC        | not represented                                                                                                                                                                                                                                                                            |
| WaterGAP2  | $A_{dom,cons}^{sw} = A_{dom,cons} \times (1 - f_{gw,use})$<br>for $A_{dom,cons} = \begin{cases} A_{dom} \times C_{dom,cons}, & year < 2000 \\ A_{dom} - A_{dom,rf}, & year \geq 2000 \end{cases}$<br>Starting with 2000 $A_{dom,cons}$ is based on return flow data, for details see [18]. |
| WAYS       | not represented                                                                                                                                                                                                                                                                            |

**Table S64.** Equations for return flow from domestic surface water abstraction ( $A_{dom,rf}^{sw}$ )

| Model      | Equation                                                                                                                                                                                 |
|------------|------------------------------------------------------------------------------------------------------------------------------------------------------------------------------------------|
| CLM4.5     | not represented                                                                                                                                                                          |
| CLM5.0     | not represented                                                                                                                                                                          |
| CWatM      | $A_{rf,nonirr} = (1 - f_{lost}) \times (A_{ind} + A_{dom} - (A_{ind,cons} + A_{dom,cons}))$<br>$A_{rf,nonirr,eva} = f_{lost} \times (A_{ind} + A_{dom} - (A_{ind,cons} + A_{dom,cons}))$ |
| DBH        | not represented                                                                                                                                                                          |
| H08        | $A_{dom,rf}^{sw} = (1 - f_{lost}) \times (1 - f_{cons,A}) \times A_{dom}^{sw}$ [24]; [12]                                                                                                |
| JULES-W1   | not represented                                                                                                                                                                          |
| LPJmL      | not represented                                                                                                                                                                          |
| Mac-PDM.20 | not represented                                                                                                                                                                          |
| MATSIRO    | 90 % of domestic water use, from surface water bodies, is implicitly assumed to have returned to the original source (surface water; [39]).                                              |
| mHM        | not represented                                                                                                                                                                          |
| MPI-HM     | not represented                                                                                                                                                                          |
| ORCHIDEE   | not represented                                                                                                                                                                          |
| PCR-GLOBWB | not represented                                                                                                                                                                          |
| VIC        | not represented                                                                                                                                                                          |
| WaterGAP2  | $A_{dom,rf}^{sw} = A_{dom,rf} \times (1 - f_{gw,use})$<br>$A_{dom,rf} = \begin{cases} A_{dom} - (A_{dom} \times C_{dom,cons}) & year < 2000 \\ A_{dom,rf} & year \geq 2000 \end{cases}$  |
| WAYS       | Starting with 2000 $A_{dom,rf}$ is based on wastewater volume data, for details see [18].<br>not represented                                                                             |

**Table S65.** Equations for livestock groundwater abstraction ( $A_{liv}^{gw}$ )

| Model      | Equation                                                                          |
|------------|-----------------------------------------------------------------------------------|
| CLM4.5     | not represented                                                                   |
| CLM5.0     | not represented                                                                   |
| CWatM      | $A_{tot}^{gw} = (1 - f_A^{sw}) \times (A_{irr} + A_{ind} + A_{dom} + A_{liv})$    |
| DBH        | not represented                                                                   |
| H08        | not represented                                                                   |
| JULES-W1   | not represented                                                                   |
| LPJmL      | not represented                                                                   |
| Mac-PDM.20 | not represented                                                                   |
| MATSIRO    | not represented                                                                   |
| mHM        | not represented                                                                   |
| MPI-HM     | not represented                                                                   |
| ORCHIDEE   | not represented                                                                   |
| PCR-GLOBWB | $A_{liv}^{gw} = \frac{R_{gw}}{R_{gw} + Q_{iu}} \times A_{liv,dem}$                |
| VIC        | not represented                                                                   |
| WaterGAP2  | water used in the livestock sector is solely abstracted from surface water bodies |
| WAYS       | not represented                                                                   |

**Table S66.** Equations for livestock groundwater consumption ( $A_{liv,cons}^{gw}$ )

| Model      | Equation                                                                                                                                                             |
|------------|----------------------------------------------------------------------------------------------------------------------------------------------------------------------|
| CLM4.5     | not represented                                                                                                                                                      |
| CLM5.0     | not represented                                                                                                                                                      |
| CWatM      | $A_{tot,cons}^{gw} = (1 - f_A^{sw}) \times (A_{irr,cons} + A_{ind,cons} + A_{dom,cons} + A_{liv})$<br>no difference between withdrawal and consumption for livestock |
| DBH        | not represented                                                                                                                                                      |
| H08        | not represented                                                                                                                                                      |
| JULES-W1   | not represented                                                                                                                                                      |
| LPJmL      | not represented                                                                                                                                                      |
| Mac-PDM.20 | not represented                                                                                                                                                      |
| MATSIRO    | not represented                                                                                                                                                      |
| mHM        | not represented                                                                                                                                                      |
| MPI-HM     | not represented                                                                                                                                                      |
| ORCHIDEE   | not represented                                                                                                                                                      |
| PCR-GLOBWB | $A_{liv,cons}^{gw} = \frac{R_{gw}}{R_{gw} + Q_{iu}} \times \frac{A_{liv,cons}}{A_{liv,dem}}$                                                                         |
| VIC        | not represented                                                                                                                                                      |
| WaterGAP2  | not represented                                                                                                                                                      |

**Table S67.** Equations for livestock surface water abstraction ( $A_{liv}^{sw}$ )

| Model      | Equation                                                                 |
|------------|--------------------------------------------------------------------------|
| CLM4.5     | not represented                                                          |
| CLM5.0     | not represented                                                          |
| CWatM      | $A_{tot}^{sw} = f_A^{sw} \times (A_{irr} + A_{ind} + A_{dom} + A_{liv})$ |
| DBH        | not represented                                                          |
| H08        | not represented                                                          |
| JULES-W1   | not represented                                                          |
| LPJmL      | not represented                                                          |
| Mac-PDM.20 | not represented                                                          |
| MATSIRO    | not represented                                                          |
| mHM        | not represented                                                          |
| MPI-HM     | not represented                                                          |
| ORCHIDEE   | not represented                                                          |
| PCR-GLOBWB | $A_{liv}^{sw} = \frac{Q_{liv}}{R_{gw} + Q_{liv}} \times A_{liv,dem}$     |
| VIC        | not represented                                                          |
| WaterGAP2  | $A_{liv}^{sw} = A_{liv,cons}^{sw}$                                       |
| WAYS       | not represented                                                          |

**Table S68.** Equations for livestock surface water consumption ( $A_{liv,cons}^{sw}$ )

| Model      | Equation                                                                                                   |
|------------|------------------------------------------------------------------------------------------------------------|
| CLM4.5     | not represented                                                                                            |
| CLM5.0     | not represented                                                                                            |
| CWatM      | same as Table S67                                                                                          |
| DBH        | not represented                                                                                            |
| H08        | not represented                                                                                            |
| JULES-W1   | not represented                                                                                            |
| LPJmL      | not represented                                                                                            |
| Mac-PDM.20 | not represented                                                                                            |
| MATSIRO    | not represented                                                                                            |
| mHM        | not represented                                                                                            |
| MPI-HM     | not represented                                                                                            |
| ORCHIDEE   | not represented                                                                                            |
| PCR-GLOBWB | $A_{liv,cons}^{sw} = \frac{Q_{iu}}{R_{gw} + Q_{iu}} \times \frac{A_{liv,cons}}{A_{liv,dem}}$               |
| VIC        | not represented                                                                                            |
| WaterGAP2  | $A_{liv,cons}^{sw} = \sum_{i=1}^{10} POP_{liv,t} \times C_{liv}^{w,req}$ for 10 livestock types [1], [34]. |
| WAYS       | not represented                                                                                            |

**Table S69.** Equations for manufacturing groundwater abstraction ( $A_{man}^{gw}$ )

| Model      | Equation                                                                                                                                                                                                                                                                                                                                                                                                                                                                                                                                                                |
|------------|-------------------------------------------------------------------------------------------------------------------------------------------------------------------------------------------------------------------------------------------------------------------------------------------------------------------------------------------------------------------------------------------------------------------------------------------------------------------------------------------------------------------------------------------------------------------------|
| CLM4.5     | not represented                                                                                                                                                                                                                                                                                                                                                                                                                                                                                                                                                         |
| CLM5.0     | not represented                                                                                                                                                                                                                                                                                                                                                                                                                                                                                                                                                         |
| CWatM      | $A_{tot}^{gw} = (1 - f_A^{sw}) \times (A_{irr} + A_{ind} + A_{dom} + A_{liv})$                                                                                                                                                                                                                                                                                                                                                                                                                                                                                          |
| DBH        | not represented                                                                                                                                                                                                                                                                                                                                                                                                                                                                                                                                                         |
| H08        | $A_{man}^{gw} = A_{man}^{gw,rw} + A_{man}^{gw,nrw}$<br>Where:<br>$A_{man}^{gw,rw} = \min(f_{gw,use} \times A_{man,dem} \times \frac{S_{gw,rw}}{\Delta t})$<br>$A_{man}^{gw,nrw} = f_{gw,use} \times A_{man,dem} - A_{man}^{gw,rw}$                                                                                                                                                                                                                                                                                                                                      |
| JULES-W1   | not represented                                                                                                                                                                                                                                                                                                                                                                                                                                                                                                                                                         |
| LPJmL      | not represented                                                                                                                                                                                                                                                                                                                                                                                                                                                                                                                                                         |
| Mac-PDM.20 | not represented                                                                                                                                                                                                                                                                                                                                                                                                                                                                                                                                                         |
| MATSIRO    | combines manufacturing sector and electricity sector and calls this sector industrial sector. Given the amount of water requirement for the industrial sector, water is firstly taken from local river flow (potentially regulated by global reservoir), then from local reservoir (same cell or upstream cell). Then, rest of water requirement unmet is taken from groundwater resource. Here, here MATSIRO assumes unlimited groundwater resource.<br>$A_{ind}^{gw} = A_{ind,dem} - A_{ind}^{sw}$ where $A_{ind,dem}$ is water requirement of the industrial sector. |
| mHM        | not represented                                                                                                                                                                                                                                                                                                                                                                                                                                                                                                                                                         |
| MPI-HM     | not represented                                                                                                                                                                                                                                                                                                                                                                                                                                                                                                                                                         |
| ORCHIDEE   | not represented                                                                                                                                                                                                                                                                                                                                                                                                                                                                                                                                                         |
| PCR-GLOBWB | $A_{man}^{gw} = \frac{R_{gw}}{R_{gw} + Q_{iu}} \times A_{man,dem}$                                                                                                                                                                                                                                                                                                                                                                                                                                                                                                      |
| VIC        | not represented                                                                                                                                                                                                                                                                                                                                                                                                                                                                                                                                                         |
| WaterGAP2  | $A_{man}^{gw} = A_{man}^c \times \frac{POP_u}{POP_c^c} \times f_{gw,use}$                                                                                                                                                                                                                                                                                                                                                                                                                                                                                               |
| WAYS       | $A_{man}^c = C_{man}^{w,ints,2005} \times GAV \times C_{man}^{tech,cr}$<br>not represented                                                                                                                                                                                                                                                                                                                                                                                                                                                                              |



**Table S70.** Equations for manufacturing groundwater consumption ( $A_{man,cons}^{gw}$ )

| Model      | Equation                                                                                                                                                                                                                                                                                                                |
|------------|-------------------------------------------------------------------------------------------------------------------------------------------------------------------------------------------------------------------------------------------------------------------------------------------------------------------------|
| CLM4.5     | not represented                                                                                                                                                                                                                                                                                                         |
| CLM5.0     | not represented                                                                                                                                                                                                                                                                                                         |
| CWatM      | $A_{tot,cons}^{gw} = (1 - f_A^{sw}) \times (A_{irr,cons} + A_{ind,cons} + A_{dom,cons} + A_{liv})$                                                                                                                                                                                                                      |
| DBH        | not represented                                                                                                                                                                                                                                                                                                         |
| H08        | $A_{man}^{gw} = A_{man,cons}^{gw} + A_{man,loss}^{gw} + A_{man,rf}^{gw}$<br>$A_{man,cons}^{gw} = f_{cons,A} \times A_{man}^{gw}$ [43]<br>$A_{man,loss}^{gw} = f_{lost} \times (1 - f_{cons,A}) \times A_{man}^{gw}$                                                                                                     |
| JULES-W1   | not represented                                                                                                                                                                                                                                                                                                         |
| LPJmL      | not represented                                                                                                                                                                                                                                                                                                         |
| Mac-PDM.20 | not represented                                                                                                                                                                                                                                                                                                         |
| MATSIRO    | <p>10 % of domestic water use is assumed to be consumptively used. Theoretically speaking:</p> $A_{ind,cons}^{gw} = X_{ind} \times A_{ind}^{gw}$<br>where $X_{ind}$ is overall water use efficiency of the industrial sector.                                                                                           |
| mHM        | not represented                                                                                                                                                                                                                                                                                                         |
| MPI-HM     | not represented                                                                                                                                                                                                                                                                                                         |
| ORCHIDEE   | not represented                                                                                                                                                                                                                                                                                                         |
| PCR-GLOBWB | $A_{man,cons}^{gw} = \frac{R_{gw}}{R_{gw} + Q_{iu}} \times \frac{A_{man,cons}}{A_{man,dem}}$                                                                                                                                                                                                                            |
| VIC        | not represented                                                                                                                                                                                                                                                                                                         |
| WaterGAP2  | $A_{man,cons}^{gw} = (A_{man}^c - A_{man,rf}^c) \times \frac{POP_u}{POP_c} \times f_{gw,use}$<br>$A_{man}^c = C_{man}^{w,ints,2005} \times GAV \times C_{man}^{tech,cr}$<br>$A_{man,rf}^c = \begin{cases} A_{man}^c \times C_{man,cons} & year < 2000 \\ A_{man}^{coo,c} + A_{man}^{ww,c} & year \geq 2000 \end{cases}$ |
| WAYS       | <p>For details on manufacturing cooling and waste water see [18].</p> not represented                                                                                                                                                                                                                                   |

**Table S71.** Equations for return flow from manufacturing groundwater abstraction ( $A_{man,rf}^{gw}$ )

| Model      | Equation                                                                                                                                                                                             |
|------------|------------------------------------------------------------------------------------------------------------------------------------------------------------------------------------------------------|
| CLM4.5     | not represented                                                                                                                                                                                      |
| CLM5.0     | not represented                                                                                                                                                                                      |
| CWatM      | $A_{rf,nonirr} = (1 - f_{lost}) \times (A_{ind} + A_{dom} - (A_{ind,cons} + A_{dom,cons}))$<br>$A_{rf,nonirr,eva} = f_{lost} \times (A_{ind} + A_{dom} - (A_{ind,cons} + A_{dom,cons}))$             |
| DBH        | not represented                                                                                                                                                                                      |
| H08        | $A_{man,rf}^{gw} = (1 - f_{lost}) \times (1 - f_{cons,A}) \times A_{man}^{gw}$                                                                                                                       |
| JULES-W1   | not represented                                                                                                                                                                                      |
| LPJmL      | not represented                                                                                                                                                                                      |
| Mac-PDM.20 | not represented                                                                                                                                                                                      |
| MATSIRO    | 90 % of domestic water use is implicitly assumed to have returned to the original source (groundwater; [39]).                                                                                        |
| mHM        | not represented                                                                                                                                                                                      |
| MPI-HM     | not represented                                                                                                                                                                                      |
| ORCHIDEE   | not represented                                                                                                                                                                                      |
| PCR-GLOBWB | $A_{man,rf}^{gw} = \frac{R_{gw}}{R_{gw} + Q_{iu}} \times \frac{A_{man,dem} - A_{man,cons}}{A_{man,dem}}$                                                                                             |
| VIC        | not represented                                                                                                                                                                                      |
| WaterGAP2  | $A_{man,rf}^{gw} = \begin{cases} A_{man}^{gw} \times C_{man,cons}, & year < 2000 \\ (A_{man}^{coo,c} + A_{man}^{ww,c}) \times \frac{POP_u}{POP_u^c} \times f_{gw,use}, & year \geq 2000 \end{cases}$ |
| WAYS       | For details on manufacturing cooling and waste water see [18].<br>not represented                                                                                                                    |

**Table S72.** Equations for manufacturing surface water abstraction ( $A_{man}^{sw}$ )

| Model      | Equation                                                                                                                                                                                                                                                                                                                                                                          |
|------------|-----------------------------------------------------------------------------------------------------------------------------------------------------------------------------------------------------------------------------------------------------------------------------------------------------------------------------------------------------------------------------------|
| CLM4.5     | not represented                                                                                                                                                                                                                                                                                                                                                                   |
| CLM5.0     | not represented                                                                                                                                                                                                                                                                                                                                                                   |
| CWatM      | $A_{tot}^{sw} = f_A^{sw} \times (A_{irr} + A_{ind} + A_{dom} + A_{liv})$                                                                                                                                                                                                                                                                                                          |
| DBH        | not used for ISIMIP2b                                                                                                                                                                                                                                                                                                                                                             |
| H08        | $A_{man}^{sw} = A_{man}^{aq} + A_{man}^{re} + A_{man}^{ri} + A_{man}^{usw}$                                                                                                                                                                                                                                                                                                       |
| JULES-W1   | not represented                                                                                                                                                                                                                                                                                                                                                                   |
| LPJmL      | prescribed data offered by ISIMIP2b                                                                                                                                                                                                                                                                                                                                               |
| Mac-PDM.20 | not represented                                                                                                                                                                                                                                                                                                                                                                   |
| MATSIRO    | combines manufacturing sector and electricity sector and calls this sector industrial sector.<br>Given the amount of water requirement for this sector, water is firstly taken from local river flow (potentially regulated by global reservoir), then from local reservoir (same cell or upstream cell).<br>$A_{ind}^{sw} = A_{ind}^{pond} + A_{ind}^{re,global} + A_{ind}^{ri}$ |
| mHM        | not represented                                                                                                                                                                                                                                                                                                                                                                   |
| MPI-HM     | not represented                                                                                                                                                                                                                                                                                                                                                                   |
| ORCHIDEE   | not represented                                                                                                                                                                                                                                                                                                                                                                   |
| PCR-GLOBWB | $A_{man}^{sw} = \frac{Q_{iu}}{R_{gw} + Q_{iu}} \times A_{man,dem}$                                                                                                                                                                                                                                                                                                                |
| VIC        | not represented                                                                                                                                                                                                                                                                                                                                                                   |
| WaterGAP2  | $A_{man}^{sw} = A_{man}^c \times \frac{POP_u}{POP_u^c} \times (1 - f_{gw,use})$<br>$A_{man}^c = C_{man}^{w,ints,2005} \times GAV \times C_{man}^{tech,cr}$                                                                                                                                                                                                                        |
| WAYS       | not represented                                                                                                                                                                                                                                                                                                                                                                   |

**Table S73.** Equations for manufacturing surface water consumption ( $A_{tot,cons}^{sw}$ )

| Model      | Equation                                                                                                                                                                                                                                                                                                                       |
|------------|--------------------------------------------------------------------------------------------------------------------------------------------------------------------------------------------------------------------------------------------------------------------------------------------------------------------------------|
| CLM4.5     | not represented                                                                                                                                                                                                                                                                                                                |
| CLM5.0     | not represented                                                                                                                                                                                                                                                                                                                |
| CWatM      | $A_{tot,cons}^{sw} = f_A^{sw} \times (A_{irr,cons} + A_{ind,cons} + A_{dom,cons} + A_{liv})$                                                                                                                                                                                                                                   |
| DBH        | not represented                                                                                                                                                                                                                                                                                                                |
| H08        | $A_{man}^{sw} = A_{man,cons}^{sw} + A_{man,loss}^{sw} + A_{man,rf}^{sw}$<br>$A_{man,cons}^{sw} = f_{cons,A} \times A_{man}^{sw}$ [12]<br>$A_{man,loss}^{sw} = f_{lost} \times (1 - f_{cons,A}) \times A_{man}^{sw}$                                                                                                            |
| JULES-W1   | See [12]                                                                                                                                                                                                                                                                                                                       |
| LPJmL      | prescribed data offered by ISIMIP2b                                                                                                                                                                                                                                                                                            |
| Mac-PDM.20 | not represented                                                                                                                                                                                                                                                                                                                |
| MATSIRO    | only 10 % of domestic water use is assumed to be consumptively used. Theoretically speaking:<br>$A_{ind,cons}^{sw} = X_{ind} \times A_{ind}^{sw}$                                                                                                                                                                              |
| mHM        | not represented                                                                                                                                                                                                                                                                                                                |
| MPI-HM     | not represented                                                                                                                                                                                                                                                                                                                |
| ORCHIDEE   | not represented                                                                                                                                                                                                                                                                                                                |
| PCR-GLOBWB | $A_{man,cons}^{sw} = \frac{Q_{iu}}{R_{gw} + Q_{iu}} \times \frac{A_{man,cons}}{A_{man,dem}}$                                                                                                                                                                                                                                   |
| VIC        | not represented                                                                                                                                                                                                                                                                                                                |
| WaterGAP2  | $A_{man,cons}^{sw} = (A_{man}^c - A_{man,rf}^c) \times \frac{POP_u}{POP_c} \times (1 - f_{gw,use})$<br>$A_{man}^c = C_{man}^{w,ints,2005} \times GAV \times C_{man}^{tech,cr}$<br>$A_{man,rf}^c = \begin{cases} A_{man}^c \times C_{man,cons} & year < 2000 \\ A_{man}^{c,oo,c} + A_{man}^{ww,c} & year \geq 2000 \end{cases}$ |
| WAYS       | For details on manufacturing cooling and waste water see [18].<br>not represented                                                                                                                                                                                                                                              |

**Table S74.** Equations for return flow from manufacturing surface water abstraction ( $A_{man,rf}^{sw}$ )

| Model      | Equation                                                                                                                                                                                               |
|------------|--------------------------------------------------------------------------------------------------------------------------------------------------------------------------------------------------------|
| CLM4.5     | not represented                                                                                                                                                                                        |
| CLM5.0     | not represented                                                                                                                                                                                        |
| CWatM      | $A_{rf,nonirr} = (1 - f_{lost}) \times (A_{ind} + A_{dom} - (A_{ind,cons} + A_{dom,cons}))$<br>$A_{rf,nonirr,eva} = f_{lost} \times (A_{ind} + A_{dom} - (A_{ind,cons} + A_{dom,cons}))$               |
| DBH        | not represented                                                                                                                                                                                        |
| H08        | $A_{man,rf}^{sw} = (1 - f_{lost}) \times (1 - f_{cons,A}) \times A_{man}^{sw}$ . See [24]                                                                                                              |
| JULES-W1   | not represented                                                                                                                                                                                        |
| LPJmL      | not represented                                                                                                                                                                                        |
| Mac-PDM.20 | not represented                                                                                                                                                                                        |
| MATSIRO    | 90 % of domestic water use is implicitly assumed to have returned to the original source (surface water; [39]).                                                                                        |
| mHM        | not represented                                                                                                                                                                                        |
| MPI-HM     | not represented                                                                                                                                                                                        |
| ORCHIDEE   | not represented                                                                                                                                                                                        |
| PCR-GLOBWB | not represented                                                                                                                                                                                        |
| VIC        | not represented                                                                                                                                                                                        |
| WaterGAP2  | $A_{man,rf}^{sw} = \begin{cases} A_{man}^{sw} \times C_{man,cons} & year < 2000 \\ (A_{man}^{coo,c} + A_{man}^{ww,c}) \times \frac{POP_u}{POP_c} \times (1 - f_{gw,use}) & year \geq 2000 \end{cases}$ |
| WAYS       | For details on manufacturing cooling and waste water see [18].<br>not represented                                                                                                                      |

**Table S75.** Equations for electricity surface water abstraction ( $A_{ele}^{sw}$ )

| Model      | Equation                                                                                                                            |
|------------|-------------------------------------------------------------------------------------------------------------------------------------|
| CLM4.5     | not represented                                                                                                                     |
| CLM5.0     | not represented                                                                                                                     |
| CWatM      | It combines manufacturing and electricity sector in industry sector.                                                                |
| DBH        | not represented                                                                                                                     |
| H08        | not represented                                                                                                                     |
| JULES-W1   | not represented                                                                                                                     |
| LPJmL      | not represented                                                                                                                     |
| Mac-PDM.20 | not represented                                                                                                                     |
| MATSIRO    | represented in table S72. It combines manufacturing and electricity sector in industry sector.                                      |
| mHM        | not represented                                                                                                                     |
| MPI-HM     | not represented                                                                                                                     |
| ORCHIDEE   | not represented                                                                                                                     |
| PCR-GLOBWB | not represented                                                                                                                     |
| VIC        | not represented                                                                                                                     |
| WaterGAP2  | $A_{ele}^{sw} = \sum_{i=1}^n J_{ele,prod,i} \times J_{ele,A,ints,i}(J_{ele,coo,i}, J_{ele,pt,i}) \times C_{ele}^{techchange\ rate}$ |
| WAYS       | not represented                                                                                                                     |

**Table S76.** Equations for electricity surface water consumption

| Model      | Equation                                                                                                                             |
|------------|--------------------------------------------------------------------------------------------------------------------------------------|
| CLM4.5     | not represented                                                                                                                      |
| CLM5.0     | not represented                                                                                                                      |
| CWatM      | not represented                                                                                                                      |
| DBH        | not represented                                                                                                                      |
| H08        | not represented                                                                                                                      |
| JULES-W1   | not represented                                                                                                                      |
| LPJmL      | not represented                                                                                                                      |
| Mac-PDM.20 | not represented                                                                                                                      |
| MATSIRO    | not represented                                                                                                                      |
| mHM        | not represented                                                                                                                      |
| MPI-HM     | not represented                                                                                                                      |
| ORCHIDEE   | not represented                                                                                                                      |
| PCR-GLOBWB | not represented                                                                                                                      |
| VIC        | not represented                                                                                                                      |
| WaterGAP2  | $A_{ele}^{sw} = \sum_{i=1}^n J_{ele,prod,i} \times J_{ele,cons,ints,i}(J_{ele,coo,i}, J_{ele,pt,i}) \times C_{ele}^{techchangerate}$ |
| WAYS       | not represented                                                                                                                      |

**Table S77.** Groundwater abstraction ( $A_{gw}$ )

| Model      | Equation                                                                                                                                                                                                                                                                                                                  |
|------------|---------------------------------------------------------------------------------------------------------------------------------------------------------------------------------------------------------------------------------------------------------------------------------------------------------------------------|
| CLM4.5     | not represented                                                                                                                                                                                                                                                                                                           |
| CLM5.0     | not represented                                                                                                                                                                                                                                                                                                           |
| CWatM      | It calculates the water abstraction in total from all users and afterwards it distributes the total withdrawal to different sources: surface water, sustainable groundwater (available groundwater), unsustainable groundwater (fossil groundwater), human water use sectors (domestic, livestock, irrigation, industry). |
| DBH        | not represented                                                                                                                                                                                                                                                                                                           |
| H08        | not represented                                                                                                                                                                                                                                                                                                           |
| JULES-W1   | not represented                                                                                                                                                                                                                                                                                                           |
| LPJmL      | not represented                                                                                                                                                                                                                                                                                                           |
| Mac-PDM.20 | not represented                                                                                                                                                                                                                                                                                                           |
| MATSIRO    | $A_{gw} = A_{irr}^{gw} - A_{dom}^{gw} - A_{ind}^{gw}$                                                                                                                                                                                                                                                                     |
| mHM        | not represented                                                                                                                                                                                                                                                                                                           |
| MPI-HM     | $A_{gw} = A_{irr}^{gw}$                                                                                                                                                                                                                                                                                                   |
| ORCHIDEE   | not represented                                                                                                                                                                                                                                                                                                           |
| PCR-GLOBWB | not represented                                                                                                                                                                                                                                                                                                           |
| VIC        | not represented                                                                                                                                                                                                                                                                                                           |
| WaterGAP2  | $A_{gw} = A_{irr}^{gw} - A_{dom}^{gw} - A_{ind}^{gw}$                                                                                                                                                                                                                                                                     |
| WAYS       | not represented                                                                                                                                                                                                                                                                                                           |



**Table S78.** Total lake abstraction ( $A_{la}$ )

| Model      | Equation                                                                                                                                                                                                                                                                                                                  |
|------------|---------------------------------------------------------------------------------------------------------------------------------------------------------------------------------------------------------------------------------------------------------------------------------------------------------------------------|
| CLM4.5     | not represented                                                                                                                                                                                                                                                                                                           |
| CLM5.0     | not represented                                                                                                                                                                                                                                                                                                           |
| CWatM      | It calculates the water abstraction in total from all users and afterwards it distributes the total withdrawal to different sources: surface water, sustainable groundwater (available groundwater), unsustainable groundwater (fossil groundwater), human water use sectors (domestic, livestock, irrigation, industry). |
| DBH        | not represented                                                                                                                                                                                                                                                                                                           |
| H08        | not represented                                                                                                                                                                                                                                                                                                           |
| JULES-W1   | not represented                                                                                                                                                                                                                                                                                                           |
| LPJmL      | $A_{la} = (A_{irr,cons,G}^{sw} + A_{hil,G}) + (A_{irr,cons,downstream}^{sw} + A_{hil,G,downstream})$                                                                                                                                                                                                                      |
| Mac-PDM.20 | not represented                                                                                                                                                                                                                                                                                                           |
| MATSIRO    | not represented                                                                                                                                                                                                                                                                                                           |
| mHM        | not represented                                                                                                                                                                                                                                                                                                           |
| MPI-HM     | $A_{la} = A_{irr}^{sw}$                                                                                                                                                                                                                                                                                                   |
| ORCHIDEE   | not represented                                                                                                                                                                                                                                                                                                           |
| PCR-GLOBWB | $A_{la} = A_{dom,dem} + A_{ind,dem} + A_{irr,dem} + A_{liv,dem}$                                                                                                                                                                                                                                                          |
| VIC        | not represented                                                                                                                                                                                                                                                                                                           |
| WaterGAP2  | $A_{la} = A_{dom}^{sw} + A_{ele}^{sw} + A_{irr}^{sw} + A_{liv}^{sw} + A_{man}^{sw}$<br>The net surface water abstraction is satisfied in WaterGAP2 in following order 1. River, 2. global lakes and reservoirs and 3. local lakes                                                                                         |
| WAYS       | not represented                                                                                                                                                                                                                                                                                                           |

**Table S79.** Total reservoir abstraction ( $A_{re}$ )

| Model      | Equation                                                                                                                                                                                                                                                                                                                  |
|------------|---------------------------------------------------------------------------------------------------------------------------------------------------------------------------------------------------------------------------------------------------------------------------------------------------------------------------|
| CLM4.5     | not represented                                                                                                                                                                                                                                                                                                           |
| CLM5.0     | not represented                                                                                                                                                                                                                                                                                                           |
| CWatM      | It calculates the water abstraction in total from all users and afterwards it distributes the total withdrawal to different sources: surface water, sustainable groundwater (available groundwater), unsustainable groundwater (fossil groundwater), human water use sectors (domestic, livestock, irrigation, industry). |
| DBH        | not used for ISIMIP2b                                                                                                                                                                                                                                                                                                     |
| H08        | $A_{re} = A_{dom,month} + A_{ind,month} + A_{irr,month}$                                                                                                                                                                                                                                                                  |
| JULES-W1   | not represented                                                                                                                                                                                                                                                                                                           |
| LPJmL      | $A_{re} = (A_{irr,cons,G}^{sw} + A_{hil,G}) + (A_{irr,consdownstream}^{sw} + A_{hil,Gdownstream})$                                                                                                                                                                                                                        |
| Mac-PDM.20 | not represented                                                                                                                                                                                                                                                                                                           |
| MATSIRO    | $A_{re} = A_{dom}^{re} + A_{ind}^{re} + A_{irr}^{re}$                                                                                                                                                                                                                                                                     |
| mHM        | not represented                                                                                                                                                                                                                                                                                                           |
| MPI-HM     | not represented                                                                                                                                                                                                                                                                                                           |
| ORCHIDEE   | not represented                                                                                                                                                                                                                                                                                                           |
| PCR-GLOBWB | $A_{la} = A_{dom,dem} + A_{ind,dem} + A_{irr,dem} + A_{liv,dem}$                                                                                                                                                                                                                                                          |
| VIC        | not represented                                                                                                                                                                                                                                                                                                           |
| WaterGAP2  | $A_{re} = A_{dom}^{sw} + A_{ele}^{sw} + A_{irr}^{sw} + A_{liv}^{sw} + A_{man}^{sw}$<br>The net surface water abstraction is satisfied in WaterGAP2 in following order 1. River, 2. global lakes and reservoirs and 3. local lakes                                                                                         |
| WAYS       | not represented                                                                                                                                                                                                                                                                                                           |

**Table S80.** Total river abstraction ( $A_{ri}$ )

| Model      | Equation                                                                                                                                                                                                                                                                                                                  |
|------------|---------------------------------------------------------------------------------------------------------------------------------------------------------------------------------------------------------------------------------------------------------------------------------------------------------------------------|
| CLM4.5     | not represented                                                                                                                                                                                                                                                                                                           |
| CLM5.0     | $A_{ri} = A_{irr}$                                                                                                                                                                                                                                                                                                        |
| CWatM      | It calculates the water abstraction in total from all users and afterwards it distributes the total withdrawal to different sources: surface water, sustainable groundwater (available groundwater), unsustainable groundwater (fossil groundwater), human water use sectors (domestic, livestock, irrigation, industry). |
| DBH        | not represented                                                                                                                                                                                                                                                                                                           |
| H08        | not represented                                                                                                                                                                                                                                                                                                           |
| JULES-W1   | not represented                                                                                                                                                                                                                                                                                                           |
| LPJmL      | not represented                                                                                                                                                                                                                                                                                                           |
| Mac-PDM.20 | not represented                                                                                                                                                                                                                                                                                                           |
| MATSIRO    | not represented                                                                                                                                                                                                                                                                                                           |
| mHM        | not represented                                                                                                                                                                                                                                                                                                           |
| MPI-HM     | combined with lake abstraction                                                                                                                                                                                                                                                                                            |
| ORCHIDEE   | not represented                                                                                                                                                                                                                                                                                                           |
| PCR-GLOBWB | not represented                                                                                                                                                                                                                                                                                                           |
| VIC        | not represented                                                                                                                                                                                                                                                                                                           |
| WaterGAP2  | $A_{ri} = A_{dom}^{sw} + A_{ele}^{sw} + A_{irr}^{sw} + A_{liv}^{sw} + A_{man}^{sw}$<br>The net surface water abstraction is satisfied in WaterGAP2 in following order 1. River, 2. global lakes and reservoirs and 3. local lakes                                                                                         |
| WAYS       | not represented                                                                                                                                                                                                                                                                                                           |

**Table S81.** Seawater abstraction ( $A_{ocean}$ )

| Model      | Equation                                                                                                                                                                                                                                                                                                                                                                                                                                          |
|------------|---------------------------------------------------------------------------------------------------------------------------------------------------------------------------------------------------------------------------------------------------------------------------------------------------------------------------------------------------------------------------------------------------------------------------------------------------|
| CLM4.5     | not represented                                                                                                                                                                                                                                                                                                                                                                                                                                   |
| CLM5.0     | not represented                                                                                                                                                                                                                                                                                                                                                                                                                                   |
| CWatM      | not represented                                                                                                                                                                                                                                                                                                                                                                                                                                   |
| DBH        | not represented                                                                                                                                                                                                                                                                                                                                                                                                                                   |
| H08        | To have the potential to use desalination three conditions must be met:<br>1) GDP > 14000 USD person / year in terms of purchasing power parity (PPP)<br>2) humidity index below 8%<br>3) within 3 grid cells of the seashore<br>It is assumed that seawater desalination is not used for irrigation and all demand for municipal and industrial water is abstracted by desalination if available. Therefore:<br>$A_{ocean} = A_{ind} + A_{muni}$ |
| JULES-W1   | not represented                                                                                                                                                                                                                                                                                                                                                                                                                                   |
| LPJmL      | not represented                                                                                                                                                                                                                                                                                                                                                                                                                                   |
| Mac-PDM.20 | not represented                                                                                                                                                                                                                                                                                                                                                                                                                                   |
| MATSIRO    | not represented                                                                                                                                                                                                                                                                                                                                                                                                                                   |
| mHM        | not represented                                                                                                                                                                                                                                                                                                                                                                                                                                   |
| MPI-HM     | not represented                                                                                                                                                                                                                                                                                                                                                                                                                                   |
| ORCHIDEE   | not represented                                                                                                                                                                                                                                                                                                                                                                                                                                   |
| PCR-GLOBWB | not represented                                                                                                                                                                                                                                                                                                                                                                                                                                   |
| VIC        | not represented                                                                                                                                                                                                                                                                                                                                                                                                                                   |
| WaterGAP2  | not represented                                                                                                                                                                                                                                                                                                                                                                                                                                   |
| WAYS       | not represented                                                                                                                                                                                                                                                                                                                                                                                                                                   |

**Table S82.** Seawater consumption ( $A_{ocean,cons}$ )

| Model      | Equation                                                                                                                                                                                                                                      |
|------------|-----------------------------------------------------------------------------------------------------------------------------------------------------------------------------------------------------------------------------------------------|
| CLM4.5     | not represented                                                                                                                                                                                                                               |
| CLM5.0     | not represented                                                                                                                                                                                                                               |
| CWatM      | not represented                                                                                                                                                                                                                               |
| DBH        | not represented                                                                                                                                                                                                                               |
| H08        | Desalination is not used for irrigation.<br>$A_{ocean,cons} = f_{cons,A} \times A_{ocean}$<br>Where $f_{cons,A}$ is the ratio of consumption to withdrawal and is equal to 0.1 and 0.15 for industrial and municipal water use, respectively. |
| JULES-W1   | not represented                                                                                                                                                                                                                               |
| LPJmL      | not represented                                                                                                                                                                                                                               |
| Mac-PDM.20 | not represented                                                                                                                                                                                                                               |
| MATSIRO    | not represented                                                                                                                                                                                                                               |
| mHM        | not represented                                                                                                                                                                                                                               |
| MPI-HM     | not represented                                                                                                                                                                                                                               |
| ORCHIDEE   | not represented                                                                                                                                                                                                                               |
| PCR-GLOBWB | not represented                                                                                                                                                                                                                               |
| VIC        | not represented                                                                                                                                                                                                                               |
| WaterGAP2  | not represented                                                                                                                                                                                                                               |
| WAYS       | not represented                                                                                                                                                                                                                               |

**Table S83.** Return flow from seawater abstraction ( $A_{ocean,rf}$ )

| Model      | Equation                                                                                                                                                                                                                                                                                                                                                               |
|------------|------------------------------------------------------------------------------------------------------------------------------------------------------------------------------------------------------------------------------------------------------------------------------------------------------------------------------------------------------------------------|
| CLM4.5     | not represented                                                                                                                                                                                                                                                                                                                                                        |
| CLM5.0     | not represented                                                                                                                                                                                                                                                                                                                                                        |
| CWatM      | not represented                                                                                                                                                                                                                                                                                                                                                        |
| DBH        | not represented                                                                                                                                                                                                                                                                                                                                                        |
| H08        | Desalination is never used for irrigation.<br>$A_{ocean,rf} = (1 - f_{lost}) \times (1 - f_{cons,A}) \times A_{ocean}$<br>Where, $f_{cons,A}$ is the ratio of consumption to withdrawal (-) and $f_{lost}$ is the proportion lost during delivery (-).<br>The first factor is set to 0.1 for industrial use and 0.15 for municipal use, the second factor is set to 0. |
| JULES-W1   | not represented                                                                                                                                                                                                                                                                                                                                                        |
| LPJmL      | not represented                                                                                                                                                                                                                                                                                                                                                        |
| Mac-PDM.20 | not represented                                                                                                                                                                                                                                                                                                                                                        |
| MATSIRO    | not represented                                                                                                                                                                                                                                                                                                                                                        |
| mHM        | not represented                                                                                                                                                                                                                                                                                                                                                        |
| MPI-HM     | not represented                                                                                                                                                                                                                                                                                                                                                        |
| ORCHIDEE   | not represented                                                                                                                                                                                                                                                                                                                                                        |
| PCR-GLOBWB | not represented                                                                                                                                                                                                                                                                                                                                                        |
| VIC        | not represented                                                                                                                                                                                                                                                                                                                                                        |
| WaterGAP2  | not represented                                                                                                                                                                                                                                                                                                                                                        |
| WAYS       | not represented                                                                                                                                                                                                                                                                                                                                                        |

## References

- [1] Alcamo, J., Döll, P., Henrichs, T., Kaspar, F., Lehner, B., Rösch, T., and Siebert, S.: Development and testing of the WaterGAP 2 global model of water use and availability, *Hydrological Sciences Journal*, 48, 317–338, <https://doi.org/10.1623/hysj.48.3.317.45290>, 2003.
- 795 [2] Andreadis, K. M., Storck, P., and Lettenmaier, D. P.: Modeling snow accumulation and ablation processes in forested environments, *Water Resources Research*, 45, W05 429, <https://doi.org/10.1029/2008WR007042>, URL <https://agupubs.onlinelibrary.wiley.com/doi/abs/10.1029/2008WR007042>, 2009.
- [3] Bergström, S.: The HBV model, in: *Computer models of watershed hydrology*, edited by Singh, V., pp. 443–476, Water Resources Publications, Lone Tree, USA, 1995.
- 800 [4] Best, J. R., Miller, P. H., and Jones, L. L.: Executive functions after age 5: Changes and correlates., *Developmental review* : DR, 29, 180–200, <https://doi.org/10.1016/j.dr.2009.05.002>, 2009.
- [5] Best, M. J., Pryor, M., Clark, D. B., Rooney, G. G., Essery, R. L. H., Ménard, C. B., Edwards, J. M., Hendry, M. A., Porson, A., Gedney, N., Mercado, L. M., Sitch, S., Blyth, E., Boucher, O., Cox, P. M., Grimmond, C. S. B., and Harding, R. J.: The Joint UK Land Environment Simulator (JULES), model description – Part 1: Energy and water fluxes, *Geoscientific Model Development*, <https://doi.org/10.5194/gmd-4-677-2011>, 2011.
- 805 [6] Blondin, C.: Parameterization of Land-Surface Processes in Numerical Weather Prediction, in: *Land Surface Evaporation*, edited by Schmugge, T. and Andre, J., pp. 31–54, Springer-Verlag, New York, [https://doi.org/10.1007/978-1-4612-3032-8\\_3](https://doi.org/10.1007/978-1-4612-3032-8_3), 1991.
- [7] Brouwer, C., Prins, K., and Heibloem, M.: *Irrigation water management: irrigation scheduling*, Training manual No. 4, 810 FAO Land and Water Development Division, Rome, 1989.
- [8] Cherkauer, K. A. and Lettenmaier, D. P.: Hydrologic effects of frozen soils in the upper Mississippi River basin, *Journal of Geophysical Research: Atmospheres*, 104, 19 599–19 610, <https://doi.org/10.1029/1999JD900337>, 1999.
- [9] Chow, V. T., Maidment, D. R., and Mays, L. W.: *Applied hydrology*, McGraw-Hill, New York, 1998.
- [10] Clapp, R. B. and Hornberger, G. M.: Empirical equations for some soil hydraulic properties, *Water Resources Research*, 815 14, 601–604, <https://doi.org/10.1029/WR014i004p00601>, URL <https://agupubs.onlinelibrary.wiley.com/doi/abs/10.1029/WR014i004p00601>, 1978.
- [11] Döll, P. and Fiedler, K.: Global-scale modeling of groundwater recharge, *Hydrology and Earth System Sciences*, 12, 863–885, <https://doi.org/10.5194/hess-12-863-2008>, URL <http://www.hydrol-earth-syst-sci.net/12/863/2008/>, 2008.
- [12] Döll, P. and Siebert, S.: Global modeling of irrigation water requirements, *Water Resources Research*, 820 38, 8–1, <https://doi.org/10.1029/2001wr000355>, 2002.
- [13] Döll, P., Kaspar, F., and Lehner, B.: A global hydrological model for deriving water availability indicators: Model tuning and validation, *Journal of Hydrology*, 270, 105–134, [https://doi.org/10.1016/S0022-1694\(02\)00283-4](https://doi.org/10.1016/S0022-1694(02)00283-4), 2003.
- [14] Döll, P., Fiedler, K., and Zhang, J.: Global-scale analysis of river flow alterations due to water withdrawals and reservoirs, *Hydrology and Earth System Sciences*, 13, 2413–2432, <https://doi.org/10.5194/hess-13-2413-2009>, 2009.
- 825 [15] D’Orgeval, T., Polcher, J., and de Rosnay, P.: Sensitivity of the West African hydrological cycle in ORCHIDEE to infiltration processes, *Hydrology and Earth System Sciences*, 12, 1387–1401, <https://doi.org/10.5194/hess-12-1387-2008>, 2008.

- 830 [16] Ducoudré, N. I., Laval, K., and Perrier, A.: SECHIBA, a new set of parameterizations of the hydrologic exchanges at the land-atmosphere interface within the LMD atmospheric general circulation model, *Journal of Climate*, 6, 248–273, [https://doi.org/10.1175/1520-0442\(1993\)006<0248:SANSOP>2.0.CO;2](https://doi.org/10.1175/1520-0442(1993)006<0248:SANSOP>2.0.CO;2), 1993.
- [17] Essery, R., Pomeroy, J., Parviainen, J., and Storck, P.: Sublimation of snow from coniferous forests in a climate model, *Journal of Climate*, 16, 1855–1864, [https://doi.org/10.1175/1520-0442\(2003\)016<1855:SOSFCF>2.0.CO;2](https://doi.org/10.1175/1520-0442(2003)016<1855:SOSFCF>2.0.CO;2), 2003.
- 835 [18] Flörke, M., Kynast, E., Bärlund, I., Eisner, S., Wimmer, F., and Alcamo, J.: Domestic and industrial water uses of the past 60 years as a mirror of socio-economic development: A global simulation study, *Global Environmental Change*, 23, 144–156, <https://doi.org/10.1016/j.gloenvcha.2012.10.018>, 2013.
- [19] Franchini, M. and Pacciani, M.: Comparative analysis of several conceptual rainfall-runoff models, *Journal of Hydrology*, 122, 161–219, [https://doi.org/10.1016/0022-1694\(91\)90178-k](https://doi.org/10.1016/0022-1694(91)90178-k), 1991.
- 840 [20] Gao, H., Tang, Q., Shi, X., Zhu, C., Bohn, T., and Su, F.: Water budget record from variable infiltration capacity (VIC) model, in: *Algorithm Theoretical Basis Document for Terrestrial Water Cycle Data Records*, pp. 120–173, UNSPECIFIED, 2010.
- [21] Gerten, D., Schaphoff, S., Haberlandt, U., Lucht, W., and Sitch, S.: Terrestrial vegetation and water balance—hydrological evaluation of a dynamic global vegetation model, *Journal of Hydrology*, 286, 249–270, <https://doi.org/https://doi.org/10.1016/j.jhydrol.2003.09.029>, URL <http://www.sciencedirect.com/science/article/pii/S0022169403003901>, 2004.
- 845 [22] Gregory, D., S. R. C. P.: *Canopy, surface and soil hydrology*, Tech. rep., Climate Research Meteorological Office, London, 1994.
- [23] Hanasaki, N., Kanae, S., and Oki, T.: A reservoir operation scheme for global river routing models, *Journal of Hydrology*, 327, 22–41, <https://doi.org/10.1016/j.jhydrol.2005.11.011>, 2006.
- 850 [24] Hanasaki, N., Yoshikawa, S., Pokhrel, Y., and Kanae, S.: A global hydrological simulation to specify the sources of water used by humans, *Hydrology and Earth System Sciences*, 22, 789–817, <https://doi.org/10.5194/hess-22-789-2018>, 2018.
- [25] Hargreaves, G. and Samani, Z.: Estimating potential evapotranspiration, *Journal of Irrigation and Drainage Engineering*, 108, 223–230, 1982.
- [26] Kaspar, F.: *Entwicklung und Unsicherheitsanalyse eines globalen hydrologischen Modells*, Ph.D. thesis, University of Kassel, Kassel, 2003.
- 855 [27] Koirala, K., Mishra, A., and Mohanty, S.: Determinants of rice productivity and technical efficiency in the Philippines, in: *Southern Agricultural Economics Association (SAEA) Annual Meeting*, pp. 1–19, Dallas, <https://doi.org/10.13140/2.1.3275.1360>, 2014.
- 860 [28] Liang, X., Lettenmaier, D., Wood, E., and Burges, S.: A simple hydrologically based model of land-surface water and energy fluxes for general-circulation models, *Journal of Geophysical Research Atmospheres*, 99, 14 415–14 428, <https://doi.org/10.1029/94JD00483>, 1994.
- [29] Liang, X., Wood, E. F., and Lettenmaier, D. P.: Surface soil moisture parameterization of the VIC-2L model: Evaluation and modification, *Global and Planetary Change*, [https://doi.org/10.1016/0921-8181\(95\)00046-1](https://doi.org/10.1016/0921-8181(95)00046-1), 1996.
- [30] Maniak, U.: *Hydrologie und Wasserwirtschaft*, Springer-Verlag, Berlin Heidelberg, <https://doi.org/10.1007/3-540-27839-7>, 1997.
- 865 [31] Milly, P. C. D.: Potential evaporation and soil moisture in general circulation models, *Journal of Climate*, 5, 209–226, [https://doi.org/10.1175/1520-0442\(1992\)005<0209:PEASMI>2.0.CO;2](https://doi.org/10.1175/1520-0442(1992)005<0209:PEASMI>2.0.CO;2), 1992.



- [32] Molnau, M. and Bissell, V.: A continuous frozen ground index for flood forecasting, 1983.
- [33] Monteith, J.: MonteithEvaporationandenvironment1965, Symposia of the Society for Experimental Biology, pp. 205–234, 1965.
- 870 [34] Müller Schmied, H., Eisner, S., Franz, D., Wattenbach, M., Portmann, F. T., Flörke, M., and Döll, P.: Sensitivity of simulated global-scale freshwater fluxes and storages to input data, hydrological model structure, human water use and calibration, *Hydrology and Earth System Sciences*, 18, 3511–3538, <https://doi.org/10.5194/hess-18-3511-2014>, 2014.
- [35] Nachtergaele, F., von Velthuisen, H., Vereist, L., Batjes, N. H., Dijkshoorn, J. A., van Engelen, V. W. P., Fischer, G., Jones, A., Montanarella, L., Petri, M., Prieler, S., Teixeira, E., Wilberg, D., and Shi, X.: Harmonized world soil database (version 1.0), FAO, Rome, Italy and IIASA, Laxenburg, Austria, 2008.
- 875 [36] Oki, T., Nishimura, T., and Dirmeyer, P.: Assessment of annual runoff from land surface models using total runoff integrating pathways (TRIP), *Journal of the Meteorological Society of Japan*, 77, 235–255, [https://doi.org/10.2151/jmsj1965.77.1B\\_235](https://doi.org/10.2151/jmsj1965.77.1B_235), 1999.
- [37] Oleson, K., Lawrence, D., Bonan, G., Drewniak, B., Huang, M., Koven, C., Levis, S., Li, F., Riley, W., Subin, Z., Swenson, S., Thornton, P., Bozbiyik, A., Fisher, R., Heald, C., Kluzek, E., Lamarque, J.-F., Lawrence, P., Leung, L., and Yang, Z.-L.: Technical description of version 4.5 of the Community Land Model (CLM), Tech. rep., National Center for Atmospheric Research, Boulder, Colorado, <https://doi.org/10.5065/D6RR1W7M>, 2013.
- 880 [38] Pokhrel, Y., Hanasaki, N., Koirala, S., Cho, J., Yeh, P. J., Kim, H., Kanae, S., and Oki, T.: Incorporating anthropogenic water regulation modules into a land surface model, *Journal of Hydrometeorology*, 13, 255–269, <https://doi.org/10.1175/JHM-D-11-013.1>, 2012.
- 885 [39] Pokhrel, Y. N., Koirala, S., Yeh, P. J., Hanasaki, N., Longuevergne, L., Kanae, S., and Oki, T.: Incorporation of ground-water pumping in a global Land Surface Model with the representation of human impacts, *Water Resources Research*, 51, 78–96, <https://doi.org/10.1002/2014WR015602>, 2015.
- [40] Robock, A., Vinnikov, K. Y., Schlosser, C. A., Speranskaya, N. A., and Xue, Y.: Use of midlatitude soil moisture and meteorological observations to validate soil moisture simulations with biosphere and bucket models, *Journal of Climate*, 8, 15–35, [https://doi.org/10.1175/1520-0442\(1995\)008<0015:UOMSMA>2.0.CO;2](https://doi.org/10.1175/1520-0442(1995)008<0015:UOMSMA>2.0.CO;2), 1995.
- 890 [41] Rogers, D. H., Lamm, F. R., Alam, M., Troolen, T. P., Clark, G. A., Barnes, P. L., and Mankin, K.: Efficiencies and water losses of irrigation systems, *Irrigation Management Series*, MF-2243, 1997.
- [42] Schulze, K. and Döll, P.: Neue Ansätze zur Modellierung von Schneeakkumulation und -schmelze im globalen Wassermodell WaterGAP, *Tagungsband zum 7. Workshop zur großskaligen Modellierung in der Hydrologie*, edited by: Ludwig, R., Reichert, D., and Mauser, W., Kassel University Press, Kassel, 2004.
- 895 [43] Shiklomanov, I. A.: Appraisal and Assessment of world water resources, *Water International*, 25, 11–32, <https://doi.org/10.1080/02508060008686794>, 2000.
- [44] Smirnova, T., Brown, J., Benjamin, S., and Kim, D.: Parameterization of cold-season processes in the MAPS land-surface scheme, *Journal of Geophysical Research*, 105, 4077–4086, <https://doi.org/10.1029/1999JD901047>, 2000.
- 900 [45] Speers, D. D. and Versteeg, J. D.: Runoff forecasting for reservoir operations - the past and the future, 1979.
- [46] Steduto, P., Hsiao, T. C., Fereres, E., and Raes, D.: Crop yield response to water, *Irrigation and Drainage Paper No. 66*, FAO, Rome, URL <http://www.fao.org/docrep/016/i2800e/i2800e.pdf>, 2012.
- [47] Storck, P.: Trees, snow and flooding: An investigation of forest canopy effects on snow accumulation and melt at the plot and watershed scales in the Pacific Northwest, *Water Resources Series Technical Report*, 161, 176, 2000.
- 905

- [48] Storck, P., Lettenmaier, D. P., and Bolton, S. M.: Measurement of snow interception and canopy effects on snow accumulation and melt in a mountainous maritime climate, Oregon, United States, *Water Resources Research*, 38, 5–16, <https://doi.org/10.1029/2002WR001281>, 2002.
- 910 [49] Takata, K., Emori, S., and Watanabe, T.: Development of the minimal advanced treatments of surface interaction and runoff, *Global and Planetary Change*, 38, 209–222, [https://doi.org/10.1016/S0921-8181\(03\)00030-4](https://doi.org/10.1016/S0921-8181(03)00030-4), 2003.
- [50] Thober, S., Cuntz, M., Kelbling, M., Kumar, R., Mai, J., and Samaniego, L.: The multiscale routing model mRM v1.0: simple river routing at resolutions from 1 to 50 km, *Geoscientific Model Development Discussions*, 12, 2501–2521, <https://doi.org/10.5194/gmd-12-2501-2019>, 2019.
- 915 [51] Van Diepen, C., Rappoldt, C., and Wolf, J.: CWFS crop growth simulation model WOFOST documentation: version 4.1, Centre for World Food Studies, Amsterdam, 1988.
- [52] Verzano, K., Bärlund, I., Flörke, M., Lehner, B., Kynast, E., Voß, F., and Alcamo, J.: Modeling variable river flow velocity on continental scale: Current situation and climate change impacts in Europe, *Journal of Hydrology*, 424–425, 238–251, <https://doi.org/10.1016/j.jhydrol.2012.01.005>, 2012.
- 920 [53] Wang, T., Ottlé, C., Boone, A., Ciais, P., Brun, E., Morin, S., Krinner, G., Piao, S., and Peng, S.: Evaluation of an improved intermediate complexity snow scheme in the ORCHIDEE land surface model, *Journal of Geophysical Research Atmospheres*, 118, 6064–6079, <https://doi.org/10.1002/jgrd.50395>, 2013.
- [54] Wang-Erlandsson, L., van der Ent, R. J., Gordon, L. J., and Savenije, H. H. G.: Contrasting roles of interception and transpiration in the hydrological cycle - Part 1: Temporal characteristics over land, *Earth System Dynamics*, 5, 441–469, <https://doi.org/10.5194/esd-5-441-2014>, 2014.
- 925 [55] Yeh, P.-F. and Eltahir, E.: Representation of water table dynamics in a land surface scheme. Part II: Subgrid variability, *Journal of Climate*, 18, 1881–1901, 2005.

## Global Water Models

Global water models (GWMs) were developed from the earliest land surface models (LSMs) created by Thornthwaite and Mather (1957), Manabe (1969), Freeze and Harlan (1969), and Deardorff (1978). These first land surface models simulated the terrestrial water cycle by considering vegetation processes, evaporation, soil moisture, and snow cover. Later on, during the 1980s, the first global hydrological model (GHMs) is developed, with a spatial resolution of  $0.5^\circ \times 0.5^\circ$ , accompanied by its essential inputs, calibration and validation datasets, and modeling application studies, thereby, emphasizing the necessity of global-scale hydrology (Vörösmarty et al., 1989). Dooge (1982) identified the two major challenges of global hydrology, scaling and parameterization, and concluded that a global scale model requires prudent simplification (Dooge, 1986). Eagleson (1986) underlined the necessity of global-scale hydrology.

In the 1990s, LSMs were intensively improved (Sellers et al., 1997), other GHMs were developed (Yates, 1997; Arnell, 1999), experiments on parameterization were done (Federer et al., 1996), and a global hydrological data compendium was made publicly available for model calibration and validation (Vörösmarty et al., 1996). Furthermore, Vörösmarty et al., 1997 assessed globally the impact of hydraulic engineering (i.e., on dams and reservoirs) on the river systems. This decade is remarkable through the community's progress toward a global-scale capability.

In the 2000s, other studies appeared on the hydrological calibration (Nijssen et al., 2001; Döll et al., 2003), human impact schemes (Alcamo et al., 2003; de Rosnay et al., 2003), and vegetation dynamics, including CO<sub>2</sub> fertilization effects (Gerten et al., 2007). Ultimately, over the years, many global water models have been developed and improved and many studies have been done to assess freshwater resources on the global scale (Bierkens, 2015). Global water models impose uncertainties from forcing data, model parameters, processes included or excluded, and numerical algorithms used. Additionally, each modeling group has a different model development concept and purpose. Therefore, many models combined in an ensemble approach collect many uncertainties and structural differences. It is recommended to evaluate GWMs for historical periods before making future projections, in order to validate their performance and reduce uncertainties (Krysanova et al., 2018; Do et al., 2020).

In the end, Arheimer et al., 2020 showed that the catchment models can be applied at a global scale because of the new global datasets, increased computational capacity, new methods to estimate parameters, and collaboration. GWMs may even become a part of the Earth System Models used to simulate the water cycle at a high resolution, including human water demand and use (Wood et al., 2011; Bierkens, 2015).

### **Evaluation of 16 global water models analyzed in the present study**

Zaherpour et al. (2018) proved that the models simulate better the monthly runoff in the wetter equatorial and northern hydrobelts than in drier southern hydrobelts. They also showed that GWMs overestimated mean and extreme monthly runoff.

Veldkamp et al. (2018) identified that mean, high and low flows are improved by considering water abstractions and reservoir operations. However, these are also influenced by uncertainties regarding water abstraction sources, return flow sinks, and the timing of these issues. Masaki et al. (2017) reported that different simulated outflows from reservoirs depend on dam operation algorithms, with similar concepts in some cases, and on the simulated river inflows. Zhao et al. (2017) highlighted the influence of the routing scheme on streamflow timing and magnitude and recommended inclusion of floodplain storage and backwater effects in models.

Wartenburger et al. (2018) demonstrated the importance of actual (simulated) land evapotranspiration in global water cycle and concluded that model results are affected by the methods used to estimate evapotranspiration, number of soil layers, model structure, and uncertainties in the climate input datasets. Wartenburger et al. (2018) recommended improving the simulation of low runoff and the magnitude and timing of seasonal cycles, investigating methods to calibrate models, testing

models with different parameter values, and examining the interconnected uncertainties (e.g., perturbed parameter ensembles: Gosling, 2013).

Scanlon et al. (2019) pointed out that some GWMs agree better with GRACE than others. They concluded that GWMs underestimated GRACE-derived seasonal water storages amplitudes in tropical and (semi-)arid basins and overestimated them in northern high-latitude basins. They suggested to increase the number of soil layers in the models, improve the simulation of snow physics by including processes that delay snowmelt, improve evapotranspiration schemes, and add surface water and groundwater storage compartments to some models.

GWMs were evaluated for a specific case: the 2003 European heatwave and drought (Schewe et al., 2019). They found that most of the models overestimate the impacts on water resources and hydropower in some river basins. They also underlined the need to further evaluate and improve the models for extreme conditions and to consider all optimistic and pessimistic results in an ensemble as hypotheses.

GWMs were also applied to model projections of climate change on irrigation water requirements (Wada et al., 2013), on regional and global water scarcity (Schewe et al., 2014), on hydrological drought (Prudhomme et al., 2014), and on soil moisture drought (agricultural drought, Grillakis, 2019). The first two studies, Wada et al. (2013) and Schewe et al. (2014), concluded that hydrological model uncertainty is higher than climate model uncertainty and explained the high variation of projected impacts of climate change on the irrigation sector and river discharge through the differences existent in the model structures.

Prudhomme et al. (2014) underlined that models project little or even no increase in drought frequency if they include the active response of vegetation to CO<sub>2</sub> and to climate change in their structure. Generally, it is also recommended to include this process in models because elevated CO<sub>2</sub> concentrations cause physiological and structural effects on plants and indirectly influence runoff and evapotranspiration over a geographical area. The physiological effect reduces the opening of leaf stomata because less water is needed to assimilate carbon, leading to decreased transpiration and, indirectly, increased runoff. The structural effect or fertilization effect causes an increase in plant growth and leads to increased transpiration per unit area and, indirectly, a decreased runoff (Gerten et al., 2004). However, Singh et al. (2020) demonstrated that increased leaf area under elevated CO<sub>2</sub> concentrations (structural effect) might counterbalance the increased water use efficiency (physiological effect).

Reinecke et al. (2021) highlighted less severe decreases of groundwater recharge, and even increases in some regions, when the CO<sub>2</sub> fertilization effect (active vegetation) is considered.

In summary, GWMs can be applied to assess the large-scale impacts of climate change and human activity on freshwater systems, in addition to some model shortcomings (Hattermann et al., 2017). Gosling et al. (2017) underlined that the global and regional water models share many similarities regarding runoff simulation results and their conceptual approach to model development, although the GWM results vary more than regional water results.

## References:

Alcamo, J., Döll, P., Henrichs, T., Kaspar, F., Lehner, B., Rösch, T., and Siebert, S.: Development and testing of the WaterGAP 2 model of global water use and availability. *Hydrol. Sci. J.* 48(3), 317–337, <https://doi.org/10.1623/hysj.48.3.317.45290>, 2003.

Arnell, N. W.: A simple water balance model for the simulation of streamflow over a large geographic domain, *J. Hydrol.*, 217, 314–335, [https://doi.org/10.1016/S0022-1694\(99\)00023-2](https://doi.org/10.1016/S0022-1694(99)00023-2), 1999.

- Bierkens, M. F. P., Bell, V. A., Burek, P., Chaney, N., Condon, L. E., David, C. H., de Roo, A., Döll, P., Drost, N., Famiglietti, J. S., Flörke, M., Gochis, D. J., Houser, P., Hut, R., Keune, J., Kollet, S., Maxwell, R. M., Reager, J. T., Samaniego, L., Sudicky, E., Sutanudjaja, E. H., van de Giesen, N., Winsemius, H., and Wood, E. F.: Hyper-resolution global hydrological modelling: what is next?, *Hydrol. Process.*, 29, 2, 310–320, <https://doi.org/10.1002/hyp.10391>, 2015.
- Deardorff, J. W.: Efficient prediction of ground surface temperature and moisture, with inclusion of a layer of vegetation, *J. Geophys. Res.*, 83, 1889–1903, <https://doi.org/10.1029/JC083iC04p01889>, 1978.
- Do, H. X., Zhao, F., Westra, S., Leonard, M., Gudmundsson, L., Boulange, J. E. S., Chang, J., Ciais, P., Gerten, D., Gosling, S. N., Müller Schmied, H., Stacke, T., Telteu, C.-E., and Wada, Y.: Historical and future changes in global flood magnitude – evidence from a model–observation investigation, *Hydrol. Earth Syst. Sci.*, 24, 1543–1564, <https://doi.org/10.5194/hess-24-1543-2020>, 2020.
- Döll, P., Kaspar, F., and Lehner, B.: A global hydrological model for deriving water availability indicators: model tuning and validation, *Journal of Hydrology*, 270, 05–134, [https://doi.org/10.1016/S0022-1694\(02\)00283-4](https://doi.org/10.1016/S0022-1694(02)00283-4), 2003.
- Dooge, J.: Parameterization of hydrologic processes, in: *Proceedings of the Greenbelt Study Conference*, edited by: Eagleson, P., Cambridge University Press, New York, N.Y., 243–288, 1982.
- Dooge, J. C. I., Looking for hydrologic laws, *Water Resour. Res.*, 22(9), 46S–58S, 1986.
- de Rosnay, P., Polcher, J., Laval, K., and Sabre, M.: Integrated parameterization of irrigation in the land surface model ORCHIDEE. Validation over Indian Peninsula, *Geophys. Res. Lett.*, 30, 1986, <https://doi.org/10.1029/2003GL018024>, 2003.
- Eagleson, P.: The emergence of global-scale hydrology, *Water Resour. Res.*, 22, 6S–14S, <https://doi.org/10.1029/WR022i09Sp0006S>, 1986.
- Federer, C.A., Vörösmarty, C.J., and Fekete, B.: Intercomparison of methods for potential evapo-transpiration in regional or global water balance models, *Water Resources Research* 32, 2315–21, <https://doi.org/10.1029/96WR00801>, 1996.
- Freeze, R. A. and Harlan, R. L.: Blueprint for a physically-based, digitally simulated hydrologic response model, *J. Hydrol.*, 9, 237–258, [https://doi.org/10.1016/0022-1694\(69\)90020-1](https://doi.org/10.1016/0022-1694(69)90020-1), 1969.
- Gerten, D., Schaphoff, S., Haberlandt, U., Lucht, W., Sitch, S.: Terrestrial vegetation and water balance - hydrological evaluation of a dynamic global vegetation model. *Journal of Hydrology*, 286(1-4), 249–270, <http://dx.doi.org/10.1016/j.jhydrol.2003.09.029>, 2004.
- Gerten, D., Schaphoff, S., and Lucht, W.: Potential future changes in water limitation of the terrestrial biosphere, *Clim. Change*, 80, 277–299, <https://doi.org/10.1007/s10584-006-9104-8>, 2007.
- Gosling, S. N.: Systematic quantification of climate change impacts modelling uncertainty, *Impacts World 2013 International Conference on Climate Change Effects (Potsdam: PIK)*, 268–274, [https://gfzpublic.gfz-potsdam.de/rest/items/item\\_152514\\_5/component/file\\_152588/content](https://gfzpublic.gfz-potsdam.de/rest/items/item_152514_5/component/file_152588/content), 2013.
- Grillakis, M.G.: Increase in severe and extreme soil moisture droughts for Europe under climate change, *Sci. Total Environ.*, 660, 1245–1255, <https://doi.org/10.1016/j.scitotenv.2019.01.001>, 2019.

Gosling, S. N., Zaherpour, J., Mount, N. J., Hattermann, F., Dankers, R., Arheimer, B., Breuer, L., Haddeland, I., Kumar, R., Kundu, D., Liu, J., van Griensven, A., Veldkamp, T., Vetter, T., Wang, X., and Zhang, X.: A comparison of changes in river runoff from multiple global and catchmentscale hydrological models under global warming scenarios of 1°C, 2°C and 3°C. *Clim Chang.*, doi:10.1007/s10584-016-1773-3, 2017.

Hattermann, F. F., Krysanova, V., Gosling, S. N., Dankers, R., Daggupati, P., Donnelly, C., Flörke, M., Huang, Sh., Motovilov, Y., Buda, S., Yang, T., Müller, C., Leng, G., Tang, Q., Portmann, F. T., Hagemann, S., Gerten, D., Wada, Y., Masaki, Y., Alemayehu, T., Satoh, Y., and Samaniego, L.: Cross-scale intercomparison of climate change impacts simulated by regional and global hydrological models in eleven large river basins. *Clim Chang.* doi.10.1007/s10584-016-1829-4, 2017.

Krysanova, V., Donnelly, C., Gelfan, A., Gerten, D., Arheimer, B., Hattermann, F., and Kundzewicz, Z. W.: How the performance of hydrological models relates to credibility of projections under climate change, *Hydro. Scie. J.*, 63:5, 696–720, <https://doi.org/10.1080/02626667.2018.1446214>, 2018.

Manabe, S.: Climate and the ocean circulation: The atmospheric circulation and the hydrology of the earth's surface, *Mon. Weather Rev.*, 97, 739–774, [https://doi.org/10.1175/1520-0493\(1969\)097<0739:CATOC>2.3.CO;2](https://doi.org/10.1175/1520-0493(1969)097<0739:CATOC>2.3.CO;2), 1969.

Masaki, Y., Hanasaki, N., Biemans, H., Müller Schmied, H., Tang, Q., Wada, Y., Gosling, S. N., Takahashi, K. and Hijioka, Y.: Intercomparison of global river discharge simulations focusing on dam operation—multiple models analysis in two case-study river basins, Missouri–Mississippi and Green–Colorado, *Environ. Res. Lett.* 12, 1–17, <https://doi.org/10.1088/1748-9326/aa57a8>, 2017.

Nijssen, B., Schnur, R., and Lettenmaier, D.P.: Global retrospective estimation of soil moisture using the variable infiltration capacity land surface model, 1980–93, *J. Clim.*, 14 (8), 1790–1808, [https://doi.org/10.1175/1520-0442\(2001\)014<1790:GREOSM>2.0.CO;2](https://doi.org/10.1175/1520-0442(2001)014<1790:GREOSM>2.0.CO;2), 2001.

Prudhomme, Ch., Giuntoli, I., Robinson, E. L., Clark, D. B., Arnell, N. W., Dankers, R., Fekete, B. M., Franssen, W., Gerten, D., Gosling, S. N., Hagemann, S., Hannah, D. M., Kim, H., Masaki, Y., Satoh, Y., Stacke, T., Wada, Y., and Wisser, D.: Hydrological droughts in the 21st century, hotspots and uncertainties from a global multimodel ensemble experiment, *PNAS*, 111, 9, 3262–3267, doi/10.1073/pnas.1222473110, 2014.

Reinecke, R., Müller Schmied, H., Trautmann, T., Andersen, L. S., Burek, P., Flörke, M., Gosling, S. N., Grillakis, M., Hanasaki, N., Koutroulis, A., Pokhrel, Y., Thiery, W., Wada, Y., Yusuke, S., and Döll, P.: Uncertainty of simulated groundwater recharge at different global warming levels: a global-scale multi-model ensemble study, *Hydrol. Earth Syst. Sci.*, 25, 787–810, <https://doi.org/10.5194/hess-25-787-2021>, 2021.

Scanlon, B. R., Zhang, Z., Rateb, A., Sun, A., Wiese, D., Save, H., Beaudoin, H., Lo, M. H., Müller-Schmied, H., Döll, P., van Beek, R., Swenson, S., Lawrence, D., Croteau, M., and Reedy, R. C.: Tracking seasonal fluctuations in land water storage using global models and GRACE satellites. *Geophysical Research Letters*, 46, 5254–5264, <https://doi.org/10.1029/2018GL081836>, 2019.

Schewe, J., Heinke, J., Gerten, D., Haddeland, I., Arnell, N.W., Clark, D.B., Dankers, R., Eisner, S., Fekete, B., Colón-González, F.J., Gosling, S.N., Kim, H., Liu, X., Masaki, Y., Portmann, F.T., Satoh, Y., Stacke, T., Tang, Q., Wada, Y., Wisser, D., Albrecht, T., Frieler, K., Piontek, F., Warszawski, L., Kabat, P.: Multi-model assessment of water scarcity under climate change, *Proceedings of the National Academy of Sciences* 111, <https://doi.org/10.1073/pnas.1222460110>, 2014.

- Schewe, J., Gosling, S. N., Reyer, Ch., Zhao, F., Ciais, Ph., Elliott, J., Francois, L., Huber, V., Lotze, H. K., Seneviratne, S. I., van Vliet, M. T. H., Vautard, R., Wada, Y., Breuer, L., Büchner, M., Carozza, D. A., Chang, J., Coll, M., Deryng, D., de Wit, A., Eddy, T. D., Folberth, Ch., Frieler, K., Friend, A. D., Gerten, D., Gudmundsson, L., Hanasaki, N., Ito, A., Khabarov, N., Kim, H., Lawrence, P., Morfopoulos, C., Müller, Ch., Müller Schmied, H., Orth, R., Ostberg, S., Pokhrel, Y., Pugh, T. A. M., Sakurai, G., Satoh, Y., Schmid, E., Stacke, T., Steenbeek, J., Steinkamp, J., Tang, Q., Tian, H., Tittensor, D. P., Volkholz, J., Wang, X., and Warszawski L.: State-of-the-art global models underestimate impacts from climate extremes, *Nat. Comm.*, 10, 1–14, <https://doi.org/10.1038/s41467-019-08745-6>, 2019.
- Sellers, P. J., Dickinson, R. E., Randall, D. A., Betts, A. K., Hall, F. G., Berry, J. A., Collatz, G. J., Denning, A. S., Mooney, H. A., Nobre, C. A., Sato, N., Field, C. B., and Henderson-Sellers, A.: Modeling the Exchanges of Energy, Water, and Carbon [www.hydrol-earth-syst-sci.net/21/4169/2017/](http://www.hydrol-earth-syst-sci.net/21/4169/2017/) *Hydrol. Earth Syst. Sci.*, 21, 4169–4193, 2017. Wada et al.: Human–water interface in hydrological modelling between Continents and the Atmosphere, *Science*, 275, 502–509, <https://doi.org/10.1126/science.275.5299.502>, 1997.
- Singh, A., Kumar, S., Akula, S., Lawrence, D. M., and Lombardozzi, D. L.: Plant Growth Nullifies the Effect of Increased Water-Use Efficiency on Streamflow Under Elevated CO<sub>2</sub> in the Southeastern United States, *Geophysical Research Letters*, 47, 4, 4–10, <https://doi.org/10.1029/2019GL086940>, 2020.
- Thornthwaite, C. W. and Mather, J. R.: Instructions and tables for computing potential evapotranspiration and the water balance, *Climatology*, 10, 183–311, 1957.
- Veldkamp, T. I. E., Zhao, F., Ward, P. J., de Moel, H., Aerts, J. C. J. H., Müller Schmied, H., Portmann, F. T., Masaki, Y., Pokhrel, Y., Liu, X., Satoh, Y., Gerten, D., Gosling, S. N., Zaherpour, J., and Wada, Y.: Human impact parameterizations in global hydrological models improve estimates of monthly discharges and hydrological extremes: a multi-model validation study, *Environ. Res. Lett.*, 13, 1–7, <https://doi.org/10.1088/1748-9326/aab96f>, 2018.
- Vörösmarty, C.J., Moore, B., Gildea, M.P., Peterson, B., Melillo, J., Kicklighter, D., Raich, J., Rastetter, E., and Steudler, P.: A continental–scale model of water balance and fluvial transport: Application to South America. *Global Biogeochemical Cycles* 3: 241-65, <https://doi.org/10.1029/GB003i003p00241>, 1989.
- Vörösmarty, C.J., Fekete, B., and Tucker, B.A.: River Discharge Database, Version 1.0 (RivDIS v1.0), Volumes 0 through 6. A contribution to IHP-V Theme 1. Technical Documents in Hydrology Series. UNESCO, Paris, <https://www.rivdis.sr.unh.edu/>, 1996.
- Vörösmarty, C.J., Sharma, K., Fekete, B., Copeland, A.H., Holden, J., Marble, J., and Lough, J.A.: The storage and aging of continental runoff in large reservoir systems of the world, *Ambio* 26, 210-19, 1997.
- Wada, Y., Wisser, D., Eisner, S., Flörke, M., Gerten, D., Haddeland, I., Hanasaki, N., Masaki, Y., Portmann, F. T., Stacke, T., Tessler, Z., and Schewe, J.: Multimodel projections and uncertainties of irrigation water demand under climate change, *Geophys. Res. Lett.*, 40, 4626–4632, <https://doi.org/10.1002/grl.50686>, 2013.
- Wartenburger, R., Seneviratne, S. I., Hirschi, M., Chang, J., Ciais, P., Deryng, D., Elliott, J., Folberth, C., Gosling, S.N., Gudmundsson, L., Henrot, A.-J., Hickler, T., Ito, A., Khabarov, N., Kim, H., Leng, G., Liu, J., Liu, X., Masaki, Y., Morfopoulos, C., Müller, C., Müller Schmied, H., Nishina, K., Orth, R., Pokhrel, Y., Pugh, T.A.M., Satoh, Y., Schaphoff, S., Schmid, E., Sheffield, J., Stacke, T., Steinkamp, J., Tang, Q., Thiery, W., Wada, Y., Wang, X., Weedon, G. P., Yang, H., Zhou, T.: Evapotranspiration simulations in ISIMIP2a—Evaluation of spatio-temporal characteristics with a comprehensive ensemble of independent datasets, *Environmental Research Letters*, 13, 075001, doi: 10.1088/1748-9326/aac4bb, 2018.

Yates, D.N.: Approaches to continental scale runoff for integrated assessment models. *J. Hydrol.* 291, 289–310, [https://doi.org/10.1016/S0022-1694\(97\)00044-9](https://doi.org/10.1016/S0022-1694(97)00044-9), 1997.

Zaherpour, J., Gosling, S. N., Mount, N., Müller Schmied, H., Veldkamp, T. I. E., Dankers, R., Eisner, S., Gerten, D., Gudmundsson, L., Haddeland, I., Hanasaki, N., Kim, H., Leng, G., Liu, J., Masaki, Y., Oki, T., Pokhrel, Y., Satoh, Y., Schewe, Ja., and Wada, Y.: Worldwide evaluation of mean and extreme runoff from six global-scale hydrological models that account for human impacts, *Environ. Res. Lett.*, 13, 1–18, 065015, <https://doi.org/10.1088/1748-9326/aac547>, 2018.

Zhao, F., Veldkamp, T. I., Frieler, K., Schewe, J., Ostberg, S., Willner, S., Schauberger, B., Gosling, S.N., Schmied, H.M., Portmann, F.T., Leng, G., Huang, M., Liu, X., Tang, Q., Hanasaki, N., Biemans, H., Gerten, D., Satoh, Y., Pokhrel, Y., Stacke, T., Ciais, P., Chang, J., Ducharne, A., Guimberteau, M., Wada, Y., Kim, H., and Yamazaki, D.: The critical role of the routing scheme in simulating peak river discharge in global hydrological models. *Environ. Res. Lett.*, 12, 075003, <https://doi.org/10.1088/1748-9326/aa7250>, 2017.

## Definitions used by 16 global water models

**Table S84. Glossary with variables used in the study**

| Symbol            | Dimension<br>(L =<br>length; T =<br>time) | Variable: with synonyms                                     | Definition                                                                                                                                                                                                                                                                                                           |
|-------------------|-------------------------------------------|-------------------------------------------------------------|----------------------------------------------------------------------------------------------------------------------------------------------------------------------------------------------------------------------------------------------------------------------------------------------------------------------|
| $A$               | $L^3 L^{-2} T^{-1}$                       | water abstraction: water withdrawal                         | amount of water extracted, from surface water or groundwater, by humans for various economic sectors. It represents the sum of the water consumed by humans (water consumption), evaporative and percorative loss, and water returned to the groundwater or surface water, being the part of the water not consumed. |
| $A_{\text{pot}}$  | $L^3 L^{-2} T^{-1}$                       | potential water abstraction: potential water withdrawal     | amount of water extracted by humans considering unlimited water supply.                                                                                                                                                                                                                                              |
| $A_{\text{act}}$  | $L^3 L^{-2} T^{-1}$                       | actual water abstraction: actual water withdrawal           | amount of water extracted by humans considering water availability.                                                                                                                                                                                                                                                  |
| $A_{\text{cons}}$ | $L^3 L^{-2} T^{-1}$                       | water consumption: water use                                | part of water extracted that evapotranspirates during use of purpose.                                                                                                                                                                                                                                                |
| $A_{\text{dom}}$  | $L^3 L^{-2} T^{-1}$                       | domestic water abstraction: domestic water withdrawal       | amount of water extracted by humans for households and small businesses.                                                                                                                                                                                                                                             |
| $A_{\text{ele}}$  | $L^3 L^{-2} T^{-1}$                       | electricity water abstraction: electricity water withdrawal | amount of water extracted by humans to cool thermal and nuclear power plants, which are using the heat, obtain by burning of fossil fuels, gas, biomass or through nuclear energy, to produce electricity.                                                                                                           |
| $A_{\text{irr}}$  | $L^3 L^{-2} T^{-1}$                       | irrigation water abstraction: irrigation water withdrawal   | amount of water extracted by humans for use in agricultural irrigation.                                                                                                                                                                                                                                              |
| $A_{\text{ind}}$  | $L^3 L^{-2} T^{-1}$                       | industrial water abstraction: industrial water withdrawal   | amount of water extracted by humans for use in industrial sector, in some models this sector includes manufacturing and electricity sectors.                                                                                                                                                                         |



|           |                     |                                                                                       |                                                                                                                                                                                       |
|-----------|---------------------|---------------------------------------------------------------------------------------|---------------------------------------------------------------------------------------------------------------------------------------------------------------------------------------|
| $A_{liv}$ | $L^3 L^{-2} T^{-1}$ | livestock water abstraction: livestock water withdrawal                               | amount of water extracted by humans for livestock production.                                                                                                                         |
| $A_{man}$ | $L^3 L^{-2} T^{-1}$ | manufacturing water abstraction: manufacturing water withdrawal                       | amount of water extracted by humans in factories, for producing goods.                                                                                                                |
| $A_{rf}$  | $L^3 L^{-2} T^{-1}$ | return flow from water abstraction: return flow from water withdrawal                 | part of water extracted by humans that returns into the soil, groundwater, lake, reservoir, river and ocean.                                                                          |
| $A^{oc}$  | $L^3 L^{-2} T^{-1}$ | seawater abstraction: seawater withdrawal                                             | seawater or saline and brackish water extracted by humans to be used for various economic sectors, for example, for domestic and manufacturing sectors or for electricity production. |
| $E_{so}$  | $L^3 L^{-2} T^{-1}$ | evaporation from soil: evaporation from bare soil                                     | amount of water that changes from liquid to vapor from the bare soil (not through vegetation).                                                                                        |
| $E_{ca}$  | $L^3 L^{-2} T^{-1}$ | canopy evaporation: evaporation of the water intercepted by canopy, interception loss | amount of water accumulated on the vegetation that changes from liquid to vapor.                                                                                                      |
| $E_{la}$  | $L^3 L^{-2} T^{-1}$ | evaporation from lake                                                                 | water that changes from liquid to vapor from a lake.                                                                                                                                  |
| $E_{re}$  | $L^3 L^{-2} T^{-1}$ | evaporation from reservoir                                                            | water that changes from liquid to vapor from a reservoir.                                                                                                                             |
| $E_{ri}$  | $L^3 L^{-2} T^{-1}$ | evaporation from river                                                                | water that changes from liquid to vapor from a river.                                                                                                                                 |
| $E_{sn}$  | $L^3 L^{-2} T^{-1}$ | sublimation: evaporation from snow                                                    | water that changes from solid (snow and ice) to vapor.                                                                                                                                |
| AET       | $L^3 L^{-2} T^{-1}$ | actual evapotranspiration: total evapotranspiration                                   | total amount of water from transpiration, evaporation, interception losses, and sublimation, considering water availability.                                                          |
| PET       | $L^3 L^{-2} T^{-1}$ | potential evapotranspiration                                                          | total amount of water from transpiration, evaporation, interception losses, and sublimation, considering unlimited water source.                                                      |
| $E_{we}$  | $L^3 L^{-2} T^{-1}$ | evaporation from wetland                                                              | water which changes from liquid to vapor above a wetland.                                                                                                                             |
| $M$       | $L^3 L^{-2} T^{-1}$ | snowmelt                                                                              | water that changes from solid to liquid.                                                                                                                                              |
| $P_{de}$  | $L^3 L^{-2} T^{-1}$ | dew                                                                                   | atmospheric water condensing directly on the land surface                                                                                                                             |
| $P_{dr}$  | $L^3 L^{-2} T^{-1}$ | drip                                                                                  | water spill from canopy to the ground when the water exceeds the canopy interception capacity (through dripping).                                                                     |
| $P_{ra}$  | $L^3 L^{-2} T^{-1}$ | rainfall                                                                              | liquid precipitation that falls in a given area and in a given time, provided as climate input data in ISIMIP2.                                                                       |
| $P_{sn}$  | $L^3 L^{-2} T^{-1}$ | snowfall                                                                              | solid precipitation, combined in small ice crystals, that falls in a given area and in a given time, provided as climate input data in ISIMIP2.                                       |
| $P_{sf}$  | $L^3 L^{-2} T^{-1}$ | stemflow                                                                              | water spill to the ground through canopy, which flows along twigs, branches and stems.                                                                                                |

|           |                     |                                                                                                                                     |                                                                                                                                                                                                                                   |
|-----------|---------------------|-------------------------------------------------------------------------------------------------------------------------------------|-----------------------------------------------------------------------------------------------------------------------------------------------------------------------------------------------------------------------------------|
| $P_{th}$  | $L^3 L^{-2} T^{-1}$ | throughfall                                                                                                                         | water spill to the ground through canopy spaces.                                                                                                                                                                                  |
| $P_{tot}$ | $L^3 L^{-2} T^{-1}$ | total precipitation:<br>precipitation                                                                                               | liquid or solid water resulting from the condensation or freezing of water vapor and falling to the ground under gravity.                                                                                                         |
| $Q_{iu}$  | $L^3 T^{-1}$        | inflow from upstream<br>surface water bodies                                                                                        | water from upstream, which can be a river, a lake, a wetland, a reservoir.                                                                                                                                                        |
| $Q_{ib}$  | $L^3 T^{-1}$        | inter-basin water<br>transfer: trans-basin<br>diversion                                                                             | anthropogenic transport of water from one river basin, where it is available, to another basin where water is less available or could be utilized for other purposes. This could be an output at a location and input to another. |
| $Q_{la}$  | $L^3 T^{-1}$        | outflow from lake                                                                                                                   | water that flows out of a lake to a river, wetland or reservoir.                                                                                                                                                                  |
| $Q_{re}$  | $L^3 T^{-1}$        | outflow from reservoir                                                                                                              | water that flows out of a reservoir, a lake which is made by humans, to a river.                                                                                                                                                  |
| $Q_{ri}$  | $L^3 T^{-1}$        | streamflow: outflow,<br>flow, river discharge                                                                                       | volumetric flow rate of water through a river cross-section. The streamflow is transfer through a channel to the ocean or to an inland sink.                                                                                      |
| $Q_{we}$  | $L^3 T^{-1}$        | outflow from wetland                                                                                                                | water that flows out of a wetland to a river.                                                                                                                                                                                     |
| $R_{cr}$  | $L^3 L^{-2} T^{-1}$ | capillary rise                                                                                                                      | water rising from roundwater to soil under the influence of capillary forces.                                                                                                                                                     |
| $R_{ct}$  | $L^3 L^{-2} T^{-1}$ | channel transmission<br>losses                                                                                                      | water from river storage which recharges the groundwater storage.                                                                                                                                                                 |
| $R_{gw}$  | $L^3 L^{-2} T^{-1}$ | groundwater runoff                                                                                                                  | water that leaves the groundwater storage to a river, lake or wetland.                                                                                                                                                            |
| $R_{gwr}$ | $L^3 L^{-2} T^{-1}$ | groundwater recharge                                                                                                                | water leaving the last soil layer(s) and reaching the groundwater storage. In some models, this variable describes <i>seepage</i> .                                                                                               |
| $R_{ho}$  | $L^3 L^{-2} T^{-1}$ | Hortonian overland flow:<br>infiltration excess<br>overland flow, flooding<br>excess overland flow,<br>unsaturated overland<br>flow | water that runs off over the soil surface because the rainfall intensity exceeds the infiltration capacity.                                                                                                                       |
| $R_{in}$  | $L^3 L^{-2} T^{-1}$ | infiltration                                                                                                                        | water from rainfall or throughfall or snowmelt or irrigation which flows through the soil surface into the root zone, under the effect of gravity.                                                                                |
| $R_{if}$  | $L^3 L^{-2} T^{-1}$ | interflow: subsurface<br>storm flow, subsurface<br>runoff                                                                           | water that runs-off laterally from the soil.                                                                                                                                                                                      |
| $R_{pe}$  | $L^3 L^{-2} T^{-1}$ | percolation                                                                                                                         | amount of water that penetrates in the soil layers, beyond the root zone of plants                                                                                                                                                |
| $R_{sat}$ | $L^3 L^{-2} T^{-1}$ | saturation excess<br>overland flow: saturation<br>overland flow, saturation<br>excess runoff, Dunne<br>runoff                       | water that runs off over the soil surface because the soil is saturated.                                                                                                                                                          |
| $R_{su}$  | $L^3 L^{-2} T^{-1}$ | surface runoff: overland<br>flow, fast runoff, flood                                                                                | water that runs-off over the soil surface as Hortonian overland flow and / or saturation excess overland flow.                                                                                                                    |

|           |                     |                                                   |                                                                                                                                                                                                                                                                                                                                                                         |
|-----------|---------------------|---------------------------------------------------|-------------------------------------------------------------------------------------------------------------------------------------------------------------------------------------------------------------------------------------------------------------------------------------------------------------------------------------------------------------------------|
|           |                     | runoff, surface flow,<br>surface or direct runoff |                                                                                                                                                                                                                                                                                                                                                                         |
| $R_{tot}$ | $L^3 L^{-2} T^{-1}$ | total runoff                                      | total amount of water that runs-off the grid-cell, either over the soil surface, or from the subsurface (lateral flow). In some studies, the streamflow is converted to runoff by dividing the streamflow values with the area upstream of the gauging station (for example, the area upstream of station according to the DDM30' river network Döll and Lehner, 2002). |
| $S_{ca}$  | $L^3 L^{-2}$        | canopy storage                                    | compartment that retains water from precipitation and loses water through throughfall, stemflow and interception loss (evaporation).                                                                                                                                                                                                                                    |
| $S_{gl}$  | $L^3 L^{-2}$        | glacier storage                                   | compartment which retains water from rainfall, snowfall, and loses water through sublimation, glacier melt, runoff from liquid precipitation.                                                                                                                                                                                                                           |
| $S_{gw}$  | $L^3 L^{-2}$        | groundwater storage                               | compartment, beneath the soil water compartment, that receives water from seepage, groundwater recharge, and loses water through capillary rise, groundwater runoff, and abstraction for human water use. Hydrologically, it includes saturated zone or phreatic zone.                                                                                                  |
| $S_{la}$  | $L^3 L^{-2}$        | lake storage                                      | compartment that fills with water through fluxes above and beyond the ground and stores water for a residence time. It loses water through discharge to other storages, evaporation, groundwater recharge, and water abstraction for human water use.                                                                                                                   |
| $S_{so}$  | $L^3 L^{-2}$        | soil storage                                      | compartment that keeps and loses water from flows above and beyond the ground's surface. Hydrologically, it includes unsaturated zone.                                                                                                                                                                                                                                  |
| $S_{re}$  | $L^3 L^{-2}$        | reservoir storage                                 | compartment that fills with water behind dams through fluxes above and beyond the ground and stores water for a residence time. It loses water through discharge to other storages, evaporation, groundwater recharge, and water abstraction for human water use.                                                                                                       |
| $S_{ri}$  | $L^3 L^{-2}$        | river storage                                     | compartment filled with water through fluxes above and beyond the ground. It loses water through river discharge, evaporation, channel transmission losses and water abstraction for human water use.                                                                                                                                                                   |
| $S_{sn}$  | $L^3 L^{-2}$        | snow storage                                      | compartment that accumulates snow below freezing temperature and loses snow by melting and sublimation.                                                                                                                                                                                                                                                                 |
| $S_{soc}$ | $L^3 L^{-2}$        | snow held on the canopy                           | snow compartment that accumulates snow on the vegetation.                                                                                                                                                                                                                                                                                                               |
| $S_{suc}$ | $L^3 L^{-2}$        | snow under the canopy                             | amount of snow accumulated under the canopy or on the soil                                                                                                                                                                                                                                                                                                              |
| $S_{sw}$  | $L^3 L^{-2}$        | surface water bodies:<br>surface water            | surface water bodies can include river, lake, wetland, and reservoir.                                                                                                                                                                                                                                                                                                   |
| $S_{we}$  | $L^3 L^{-2}$        | wetland storage                                   | compartment, as a transition area between the terrestrial and aquatic systems, filled by precipitation or inflow and emptied by evapo(transpi)ration, outflow and groundwater recharge.                                                                                                                                                                                 |
| $T$       | $L^3 L^{-2} T^{-1}$ | transpiration                                     | water evaporated by plants through their stomata.                                                                                                                                                                                                                                                                                                                       |

Note: In the ISIMIP2b, the word “prescribed” has two meanings: (i) data which are simulated by other models and provided by the ISIMIP2b framework as input (<https://www.isimip.org/gettingstarted/details/38/>); (ii) data obtained from satellite observations, other datasets, or maps. Prescribed data highlight some limitations of the models or underline the lack of some processes that were intentionally or non-intentional removed from the model structure, according to the purpose of the model development or other priorities such as time.

## Examples of how different model equations can be between GWMs

Different equations used by GWMs led to different model results, for example, different evapotranspiration methods led to significant differences in runoff estimation (Gosling and Arnell, 2011b; Kingston et al., 2009). The equations include parameters that are used to calibrate GWMs. The application of different parameter values can lead to different results between models (as can the employment of different model structures). As examples, we present how global water models simulate the groundwater recharge and the maximum value of canopy storage differently.

**Groundwater recharge (Table S30)** is computed by 14 models. JULES-W1 and LPJmL do not include in their structure groundwater storage and seepage (the water that seeps from the last soil layer), which was reported as groundwater recharge and groundwater runoff for ISIMIP2b. CLM4.5 and CLM5.0 use the same approach to compute groundwater recharge, by using the concept of soil matrix potential and considering the hydraulic conductivity of the layer containing the water table. CWatM and PCR-GLOBWB use the same approach by reducing percolation with capillary rise, but CWatM also considers preferential flow as inflow. DBH estimates it depending on potential soil water content multiplied by the soil depth layer and maximized by soil hydraulic conductivity. Three models (H08, WaterGAP2, and WAYS) consider it as being the minimum value between maximum groundwater recharge and total runoff from land, weighted by a relief-related factor, a soil texture-related factor, a hydrogeology-related factor, and a permafrost- and/or glacier-related factor (Döll and Fiedler, 2008). Further, WaterGAP2 sets (semi-)arid grid cells, sandy texture, and grid cells with throughfall equal or below  $12.5 \text{ (mm day}^{-1}\text{)}$  to 0. MATSIRO estimated groundwater recharge as being the variation of unfrozen soil moisture over time. MPI-HM equals groundwater recharge to percolation. ORCHIDEE estimates it depending on relative soil water content, but it is capped down to 0 and maximized by groundwater runoff.

**Maximum value of canopy storage (Table S7).** Another example is that the models estimate differently the maximum value of canopy storage and leaf area index (LAI) values. WaterGAP2 and WAYS estimate the maximum value of canopy storage by multiplying 0.3 mm with LAI. Further, WAYS estimates seasonal LAI depending on the growing-season index, day length, and the actual root zone water storage. The root zone soil moisture stress parameter is fixed at 0.07, while WaterGAP2 estimates LAI based on a simple growth model and based on land cover characteristics (Table S7). VIC multiplies 0.2 mm by the monthly LAI. Additional, VIC takes into account aerodynamic and architectural resistances. CWatM equals maximum value of canopy storage with LAI that varies every 10 days depending on land use classes.

### References:

- Gosling, S. N., Taylor, R. G., Arnell, N. W., and Todd, M. C.: A comparative analysis of projected impacts of climate change on river runoff from global and catchment-scale hydrological models, *Hydrol. Earth Syst. Sci.*, 15, 279–294, <https://doi.org/10.5194/hess-15-279-2011>, 2011
- Kingston, D. G., M. C. Todd, R. G. Taylor, J. R. Thompson, and N. W. Arnell: Uncertainty in the estimation of potential evapotranspiration under climate change, *Geophys. Res. Lett.*, 36, L20403, <https://doi.org/10.1029/2009GL040267>, 2009.

**Table S85. Downscaled and bias-adjusted output from CMIP5 Global Climate Models (GCMs) used by the ISIMIP2b Impact Models<sup>1</sup> with a spatial resolution of 0.5°x 0.5° and a daily temporal resolution**

| GCM output used <sup>2</sup> | Models                                                                                                                  |
|------------------------------|-------------------------------------------------------------------------------------------------------------------------|
| IPSL-CM5A-LR                 | CLM4.5, CLM5.0, CWatM, DBH, H08, JULES-W1, LPJmL, MATSIRO, mHM, MPI-HM, ORCHIDEE, PCR-GLOBWB, WaterGAP2, WAYS           |
| HadGEM2-ES                   | CLM4.5, CLM5.0, CWatM, H08, JULES-W1, LPJmL, MATSIRO, mHM, ORCHIDEE, PCR-GLOBWB, WaterGAP2, WAYS                        |
| GFDL-ESM2M                   | CLM4.5, CLM5.0, CWatM, H08, JULES-W1, LPJmL, MATSIRO, mHM, MPI-HM, ORCHIDEE, ORCHIDEE-DGVM, PCR-GLOBWB, WaterGAP2, WAYS |
| MIROC5                       | CLM4.5, CLM5.0, CWatM, H08, JULES-W1, LPJmL, MATSIRO, mHM, MPI-HM, ORCHIDEE, PCR-GLOBWB, WaterGAP2, WAYS                |

Notes:

1. Source data: <https://www.isimip.org/gettingstarted/availability-input-data-isimip2b/>, 2. Earth2Observe, WFDEI and ERA-Interim data Merged and Bias-corrected for ISIMIP (EWEMBI), <http://dataservices.gfz-potsdam.de/pik/showshort.php?id=escidoc:1809891>. Data source of the bias-corrected atmospheric data is ISIMIP project.

2. Data source of the original data: CMIP5 (Coupled Model Intercomparison Project Phase 5)

Reference: Lange, S. (2016): Earth2Observe, WFDEI and ERA-Interim data Merged and Bias-corrected for ISIMIP (EWEMBI). GFZ Data Services. <http://doi.org/10.5880/pik.2016.004>

**Table S86. Climate variables used as input for the ISIMIP2b Impact Models<sup>1</sup> with a spatial resolution of 0.5°x 0.5° and a time span between 1661 – 2299**

| Variable name                   | Symbol (unit)                              | Temporal resolution | Models                                                                                                     |
|---------------------------------|--------------------------------------------|---------------------|------------------------------------------------------------------------------------------------------------|
| snowfall                        | prsn (kg m <sup>-2</sup> s <sup>-1</sup> ) | 3 hourly            | MATSIRO                                                                                                    |
| total precipitation             | pr (kg m <sup>-2</sup> s <sup>-1</sup> )   | daily               | H08<br>CLM4.5, CLM5.0, DBH, JULES-W1, H08, LPJmL, Mac-PDM.20, mHM, MPI-HM, ORCHIDEE, PCR-GLOBWB, WaterGAP2 |
| near surface wind speed         | sfcWind (m s <sup>-1</sup> )               | daily               | CLM4.5, CWatM,DBH, H08, JULES-W1, Mac-PDM.20, ORCHIDEE                                                     |
| eastward wind                   | ua (m s <sup>-1</sup> )                    | daily               | CLM5.0, ORCHIDEE                                                                                           |
| westward wind                   | va (m s <sup>-1</sup> )                    | daily               | CLM5.0, ORCHIDEE                                                                                           |
| surface air pressure            | ps (Pa)                                    | daily               | CLM5.0, CWatM, DBH, H08, JULES-W1, ORCHIDEE                                                                |
| near surface specific humidity  | huss (kg kg <sup>-1</sup> )                | 3 hourly            | MATSIRO, ORCHIDEE                                                                                          |
| relative humidity               | rhs (%)                                    | daily               | CLM4.5, CWatM, H08, JULES-W1, H08                                                                          |
| mean temperature                | tas (K)                                    | 3 hourly            | CLM5.0, CWatM, DBH, JULES-W1, Mac-PDM.20                                                                   |
| maximum temperature             | tasmax (K)                                 | daily               | MATSIRO<br>DBH, CWatM, JULES-W1, mHM, ORCHIDEE , PCR-GLOBWB                                                |
| minimum temperature             | tasmin (K)                                 | daily               | DBH, CWatM, JULES-W1, mHM, ORCHIDEE, PCR-GLOBWB                                                            |
| shortwave downwelling radiation | rsds (W m <sup>-2</sup> )                  | daily               | CLM4.5, CLM5.0, CWatM, DBH, JULES-W1, H08, LPJmL <sup>2</sup> , Mac-PDM.20, ORCHIDEE, WaterGAP2            |
| longwave downwelling radiation  | rlds (W m <sup>-2</sup> )                  | 3 hourly            | MATSIRO                                                                                                    |
|                                 |                                            | daily               | CLM4.5, CLM5.0, CWatM, DBH, JULES-W1, H08, Mac-PDM.20, ORCHIDEE, WaterGAP2                                 |
|                                 |                                            | 3 hourly            | MATSIRO                                                                                                    |

Note:

1: Data source of the bias-corrected atmospheric data: ISIMIP project and Lange, 2016; Data source of the original data: CMIP5 (Coupled Model Intercomparison Project Phase 5)

2: LPJmL: Long wave net radiation derived from longwave downwelling radiation and mean temperature.

3: *Climate forcings* are used by climate community to point out the natural and human-made factors that affect the Earth's climate (IPCC, 2012). Natural factors include the Sun's energy, regular changes in the Earth's orbital cycle, and large volcanic eruptions, while human-made factors are greenhouse gas emissions and land use changes. The global hydrological community and vegetation community consider *climate forcings* as climate input data or climate variables for their models.

Reference: Lange, S. (2016): Earth2Observe, WFDEI and ERA-Interim data Merged and Bias-corrected for ISIMIP (EWEMBI). GFZ Data Services. <http://doi.org/10.5880/pik.2016.004>

**Table S87. CO<sub>2</sub> concentrations and Land use datasets**

| Dataset                                    | Variable name / short description                                                                                                                                           | Symbol          | Data source                                                                                      | Time Span            | Spatial Resolution | Temporal Resolution                                | Models                                                             |
|--------------------------------------------|-----------------------------------------------------------------------------------------------------------------------------------------------------------------------------|-----------------|--------------------------------------------------------------------------------------------------|----------------------|--------------------|----------------------------------------------------|--------------------------------------------------------------------|
| Atmospheric CO <sub>2</sub> concentrations | CO <sub>2</sub> concentrations / Values are constant for 1661 – 1860, following observations from 1861 – 2005, and correspond to RCP 2.6 and 6.0 from 2006 – 2299           | CO <sub>2</sub> |                                                                                                  | 1661 – 2299          | 0.5°x0.5°          | annual<br><br>constant                             | CLM4.5, CLM5.0, DBH, JULES-W1, LPJmL, ORCHIDEE, PCR-GLOBWB H08     |
| MIRCA2000                                  | irrigated and rainfed crop areas / around the year 2000                                                                                                                     | LU              | Portmann et al., 2000                                                                            | 1998 – 2002          | 0.5°x0.5° / 5°x5°  | monthly                                            | H08, ORCHIDEE, MPI-HM                                              |
| Historical, gridded land use               | Land use / 5 Rainfed crop land, irrigated crop land, pastures and total crop land (the sum of rainfed and irrigated)                                                        | LUH             | HYDE 3.2, Klein Goldewijk, 2017                                                                  | 10 000 BCE – 2015 CE | 0.5°x0.5°          | 2000 - 2015 CE: annual<br>1700 - 2000 CE: 10 years | CLM4.5, CLM5.0, CWatM, H08LPJmL, mHM, MPI-HM, ORCHIDEE, PCR-GLOBWB |
| Future land-use patterns                   | Land use and land cover / 6 land-use types: rain-fed crop land, irrigated crop-land, rain-fed bioenergy, irrigated bio-energy, pastures, natural vegetation and urban areas | LULC            | MAGPIE land-use model according to the SSP2 shared-socio-economic pathway and RCP 2.6 / RCP 6.0. | 2006 – 2100          | 0.5°x0.5°          | annual                                             | JULES-W1, MPI-HM                                                   |

Note: 1. <https://www.isimip.org/gettingstarted/details/30/>

Reference:

1. Klein Goldewijk, Dr. ir. C.G.M. (Utrecht University) (2017): Anthropogenic land-use estimates for the Holocene; HYDE 3.2. DANS. <https://doi.org/10.17026/dans-25g-gez3>
2. Portmann, F. T., Siebert, S. & Döll, P. (2010): MIRCA2000 – Global monthly irrigated and rainfed crop areas around the year 2000: A new high-resolution data set for agricultural and hydrological modeling, *Global Biogeochemical Cycles*, 24, GB 1011, doi:10.1029/2008GB003435.

**Table S88. Other input data sets used by the ISIMIP2b Impact models**

| Dataset                                                                             | Data source                                                                                                                                                                      | Spatial Resolution                                                                        | Temporal resolution / details / Time span                          | Models                                                                                                           |
|-------------------------------------------------------------------------------------|----------------------------------------------------------------------------------------------------------------------------------------------------------------------------------|-------------------------------------------------------------------------------------------|--------------------------------------------------------------------|------------------------------------------------------------------------------------------------------------------|
| soil type <sup>1</sup>                                                              | ISIMIP2b                                                                                                                                                                         | 0.5°x05°                                                                                  | static                                                             | CLM4.5, CLM5.0, DBH, JULES-W1, LPJmL, MPI-HM, ORCHIDEE, PCR-GLOBWB, WaterGAP2 <sup>4</sup>                       |
| plant functional types (PFT) parameters                                             | Samanta et al., 2014                                                                                                                                                             | 0.5°x05°                                                                                  | static                                                             | JULES-W1                                                                                                         |
| topographical information (subgrid slope distribution)                              | Hagemann and Gates, 2003                                                                                                                                                         | 1kmx1km                                                                                   | static                                                             | MPI-HM                                                                                                           |
| River-routing network                                                               | DDM30 <sup>2</sup> (Döll and Lehner, 2002)<br>TRIP model<br>Simulated<br>Topological<br>Network (STN-30p) (Vörösmarty et al., 2000)<br>HydroSHEDS <sup>Lehner et al., 2006</sup> | 30'x30' (0.5°x05°)                                                                        | static                                                             | CLM4.5, CLM5.0, CWatM, H08, LPJmL, MPI-HM, PCR-GLOBWB <sup>5</sup> , WaterGAP2<br>MATSIRO<br>ORCHIDEE<br><br>mHM |
| crop parameters                                                                     |                                                                                                                                                                                  | 0.5°x05°                                                                                  | static                                                             | H08                                                                                                              |
| Albedo                                                                              | 2012                                                                                                                                                                             | 0.5°x05°                                                                                  | static                                                             | H08, CWatM <sup>6</sup> ,                                                                                        |
| Land-sea mask                                                                       | ISIMIP2b                                                                                                                                                                         | 0.5°x05°                                                                                  | static                                                             | CLM5.0, DBH, CWatM, Mac-PDM.20, mHM, MPI-HM, ORCHIDEE, PCR-GLOBWB, WaterGAP2                                     |
| GRanD                                                                               | Lehner et al., 2011                                                                                                                                                              | 6862 dams and their associated reservoirs, total storage capacity of 6197 km <sup>3</sup> | static                                                             | CWatM <sup>7</sup> , H08, LPJmL, MATSIRO, PCR-GLOBWB, WaterGAP2 <sup>8</sup>                                     |
| Water abstraction for domestic and industrial uses consistent with SSP2 and RCP 6.0 | ISIMIP2b <sup>3</sup> , multi-model averages of<br>PCR, WaterGAP,<br>H08                                                                                                         | 0.5°x05°                                                                                  | available until 2050, the values are kept static from 2050 onwards | LPJmL                                                                                                            |
| Global Lakes and Wetlands Database (GLWD)                                           | Lehner and Döll, 2004; Lehner et al., 2011                                                                                                                                       | 1:1 to 1:3 million resolution                                                             | static                                                             | MPI-HM, PCR-GLOBWB, WaterGAP2                                                                                    |
| Regarding soil data — we use the SoilGrids250 from ISRIC:                           | Hengl et al., 2017                                                                                                                                                               | 0.002°x0.002°                                                                             | static                                                             | mHM                                                                                                              |

**Note:** 1. H08 does not require soil type. In addition to estimate subgrid slope distribution, information about permafrost, slope, geology etc. are required (see Hanasaki et al., 2018). 2. DDM30 = the 30' global drainage direction map (Döll and Lehner, 2002). 3. For modelling groups that do not have their own representation, ISIMIP2b provides files containing the multi-model mean from WaterGAP2, PCR-GLOBWB and H08 scenarios for domestic and industrial uses under SSP2 from the Water Futures and Solutions Project (WFaS; Wada et al., 2016). 4. Soil data from WISE Available Water Capacity (Batjes, 2012). 5. PCR-GLOBWB combines DDM30 with GLWD. 6. Muller et al., 2012. 7. CWatm: HydroLakes database (Messenger et al., 2016; Lehner et al., 2011) 8. WaterGAP2 uses a pre-published and adjusted version of GRanD, see <https://www.arcgis.com/home/item.html?id=d966db9c7b2949ac8380458d7020adf9>.

**References:**

Batjes, N. H. (2012): ISRIC-WISE derived soil properties on 5 by 5 arc-minutes global grid (ver. 1.2). ISRIC World Soil Information, ISRIC Report 2012 / 01. [https://www.isric.org/sites/default/files/isric\\_report\\_2012\\_01.pdf](https://www.isric.org/sites/default/files/isric_report_2012_01.pdf)



Döll, P., Lehner, B. (2002): Validation of a new global 30-minute drainage direction map. *Journal of Hydrology*, 258(1-4), 214-231.

Flörke, M., Kynast, E., Bärlund, I., Eisner, S., Wimmer, F., Alcamo, J. (2013): Domestic and industrial water uses of the past 60 years as a mirror of socio-economic development: A global simulation study. *Global Environ. Change*, 23, 144-156. doi:10.1016/j.gloenvcha.2012.10.018.

Hagemann, S., Gates, L. D. (2003): Improving a subgrid runoff parameterization scheme for climate models by the use of high resolution data derived from satellite observations. *Climate Dynamics*, Volume 21, Issue 3-4, 349-359.

Hanasaki, N., Yoshikawa, S., Pokhrel, Y., Kanae, S. (2018): A global hydrological simulation to specify the sources of water used by humans. *Hydrol. Earth Syst. Sci.*, 22, 789-817, <https://doi.org/10.5194/hess-22-789-2018>.

Hengl, T., de Jesus, J.M., Heuvelink, G.B., Gonzalez, M.R., Kilibarda, M., Blagotić, A., Shangguan, W., Wright, M.N., Geng, X., Bauer-Marschallinger, B. and Guevara, M.A., 2017. SoilGrids250m: Global gridded soil information based on machine learning. *PLoS one*, 12(2).

Lehner, B. and Döll, P. (2004): Development and validation of a global database of lakes, reservoirs and wetlands. *Journal of Hydrology* 296, 1-4: 1-22

Lehner, B., Verdin, K., and Jarvis, A.: *HydroSHEDS Technical Documentation*, World Wildlife Fund US, Washington, DC., 26, <http://hydrosheds.cr.usgs.gov>, 2006.

Lehner, B., Reidy Liermann, C. Revenga, C., Vörösmarty, C., Fekete, B., Crouzet, P., Döll, P., Endejan, M., Frenken, K., Magome, J., Nilsson, C., Robertson, J.C., Rodel, R., Sindorf, N., Wisser, D. (2011): High-Resolution Mapping of the World's Reservoirs and Dams for Sustainable River-Flow Management. *Frontiers in Ecology and the Environment* 9 (9), 494-502. <http://dx.doi.org/10.1890/100125>.

Samanta, A., Ganguly, S., Schull, M. A., Shabanov, N. V., Knyazikhin, Y., and Myneni, R. B.: Collection 5 MODIS LAI/FPAR Products, Presented at AGU Fall Meeting, San Francisco, USA, 15-19 December, 2008, 2012.

Vörösmarty, C. J., Fekete, B. M., Meybeck, M., and Lammers, R. B.: Global system of rivers: Its role in organizing continental land mass and defining land-To-Ocean linkages. *Global Biogeochem. Cy.*, 14, 599-621, <https://doi.org/10.1029/1999GB900092>, 2000.

Messenger, M. L., Lehner, B., Grill, G., Nedeva, I., and Schmitt, O.: Estimating the volume and age of water stored in global lakes using a geo-statistical approach. 7, 13603, 10.1038/ncomms13603, 2016

Muller, P. J., Lewis, P., Fischer, J., North, P., and Framer, U.: The ESA GlobAlbedo Project for mapping the Earth's land 1105 surface albedo for 15 Years from European Sensors., paper presented at IEEE Geoscience and Remote Sensing Symposium (IGARSS) IEEE Geoscience and Remote Sensing Symposium (IGARSS) 2012, Munich, Germany, 22-27.7.12., 2012

Wada, Y., Flörke, M., Hanasaki, N., Eisner, S., Fischer, G., Tramberend, S., Satoh, Y., van Vliet, M. T. H., Yillia, P., Ringler, C., Burek, P., and Wiberg, D. (2016): Modeling global water use for the 21st century: the Water Futures and Solutions (WFaS) initiative and its approaches. *Geosci. Model Dev.*, 9, 175-222, <https://doi.org/10.5194/gmd-9-175-2016>.

**Table S89. Natural Vegetation datasets used by the ISIMIP2b impact models**

| Dataset                                        | Data source                                               | Time Span               | Spatial Resolution | Models                         |
|------------------------------------------------|-----------------------------------------------------------|-------------------------|--------------------|--------------------------------|
| Land Surface Parameter set 2 (LSP2)            | Hagemann, 2002                                            | 2001                    | 0.5°x0.5°          | LPJmL, MPI-HM                  |
| MODIS                                          | NASA                                                      |                         | 0.5°x0.5°          | CLM5.0, WaterGAP2 <sup>1</sup> |
| Global Land Cover for Simple Biosphere 2 Model | FAO                                                       | April 1992 – March 1993 | 1kmx1km            | DBH                            |
| Global Land Cover Map (GlobCover)              | European Space Agency GlobCover Portal (ESA) <sup>4</sup> | 2009                    | 0.5°x0.5°          | Mac-PDM.20, mHM, PCR-GLOBWB    |

Note: 1. WaterGAP2 uses The International Geosphere–Biosphere Programme (IGBP) classification based on MODIS data for the year 2004.

References:

Hagemann, S (2002). An Improved Land Surface Parameter Dataset for Global and Regional Climate Models. Max-Planck-Institut für Meteorologie. MPI Report 336, ISSN 0937-1060.

<https://modis.gsfc.nasa.gov/data/>

<http://www.fao.org/land-water/land/land-governance/land-resources-planning-toolbox/category/details/en/c/1036354/>

[http://due.esrin.esa.int/page\\_globcover.php](http://due.esrin.esa.int/page_globcover.php)

**Table S90. Socio-economic datasets with a spatial resolution of 0.5°x0.5° and 5'x5' and an annual temporal resolution**

| Dataset name                                                        | Variable name / details                                                                               | Symbol (unit)               | Data source                                                    | Time Span                  | Models                  |
|---------------------------------------------------------------------|-------------------------------------------------------------------------------------------------------|-----------------------------|----------------------------------------------------------------|----------------------------|-------------------------|
| Historical, country-level population                                | population                                                                                            | pop (number people)         | Hyde 3.2 (Klein Goldewijk et al., 2010; Klein Goldewijk, 2011) | 1861 – 2009                | PCR-GLOBWB<br>WaterGAP2 |
| Historical, gridded population                                      | population                                                                                            | pop (number people)         | Hyde 3.2 (Klein Goldewijk et al., 2010; Klein Goldewijk, 2011) | 1861 – 2005                | PCR-GLOBWB<br>WaterGAP2 |
| Future, country-level population                                    | country-level population, urban population and age structure (in five-year age bands) / based on SSP2 | pop (number people)         | IIASA (population & age structure) and NCAR (urbanshare)       | 2006 – 2099                | PCR-GLOBWB<br>WaterGAP2 |
| Future, gridded population                                          | population / based on SSP2<br>population / based on all SSPs                                          | pop (number people)         | Samir and Lutz, 2014 <sup>3</sup><br>Jones and O'Neill, 2016   | 2006 – 2099<br>2006 – 2100 | PCR-GLOBWB<br>WaterGAP2 |
| Historical, country-level Gross Domestic Product (GDP) <sup>1</sup> | Gross Domestic Product                                                                                | GDP (per capita and PPP \$) | Geiger and Frieler, 2018                                       | 1861 – 2005                | PCR-GLOBWB<br>WaterGAP2 |
| Future, gridded Gross Domestic Product (GDP) <sup>2</sup>           | Gross Domestic Product                                                                                | GDP (per capita and PPP \$) | Murakamiaa and Yamagata, 2016                                  | 2006-2099                  | PCR-GLOBWB<br>WaterGAP2 |
| Future, country-level Gross Domestic Product (GDP)                  | Gross Domestic Product                                                                                | GDP (per capita and PPP \$) | Geiger and Frieler, 2017; Geiger and Frieler, 2018             | 2006-2100                  | PCR-GLOBWB<br>WaterGAP2 |

Note: 1. National income (GDP / capita) and GDP time series (2005 PPP \$, purchasing power parities (PPP) conversion factor, local currency unit to international dollar) from 1850-2009 from Penn World Tables 8.1 extrapolated with per capita growth rates from the Maddison project, and extended by Penn World Tables 9.0 and World Development Indicators. Interpolated between 2006-2009 to match with OECD SSP2 projections starting in 2010. 2. All dataset: 1980 – 2100, by 10 years. The data in 1980–2010 are estimated by downscaling actual populations and GDPs by country, while those in 2020–2100 are estimated by downscaling projected populations and GDPs under three shared socioeconomic pathways (SSP): SSP1; SSP2; and SSP3, by country. 3. <https://www.isimip.org/gettingstarted/details/32/>

**References:**

1. Geiger, T., Frieler, K. (2017): Continuous national Gross Domestic Product (GDP) time series for 195 countries: past observations (1850-2005) harmonized with future projections according the Shared Socio-economic Pathways (2006-2100). GFZ Data Services. <http://doi.org/10.5880/pik.2017.003>
2. Geiger, T., Frieler, K. (2018): Continuous national Gross Domestic Product (GDP) time series for 195 countries: past observations (1850-2005) harmonized with future projections according the Shared Socio-economic Pathways (2006-2100) (Version 2.0) [Data set]. GFZ Data Services. <https://doi.org/10.5880/pik.2018.010>

3. Jones, B., O'Neill, B. C. (2016): Spatially explicit global population scenarios consistent with the Shared Socioeconomic Pathways. *Environmental Research Letters*, 11(8), 084003. <http://doi.org/10.1088/1748-9326/11/8/084003>
4. Klein Goldewijk, K., Beusen, A., Janssen, P. (2010): Long-term dynamic modeling of global population and built-up area in a spatially explicit way: HYDE 3.1. *Holocene*, 20(4), pp. 565-573, doi: <http://dx.doi.org/10.1177/0959683609356587>.
5. Klein Goldewijk, K., Beusen, A., Van Drecht, G., De Vos, M. (2011): The HYDE 3.1 spatially explicit database of human-induced global land-use change over the past 12,000 years. *Global Ecology and Biogeography*, 20(1), pp. 73-86, doi: <http://dx.doi.org/10.1111/j.1466-8238.2010.00587.x>.
6. Murakami, D., Yamagata, Y. (2016): Estimation of gridded population and GDP scenarios with spatially explicit statistical downscaling. *ArXiv*, 1610.09041, URL: <https://arxiv.org/abs/1610.09041>.

**Table S91. Hydrological output data of the ISMIP2b global water models1 with a spatial resolution of 0.5°x 0.5°**

| Hydrological variable               | ISMIP2b protocol Symbol<br>(Units) / Temporal resolution | Models                                                                                                                                   |
|-------------------------------------|----------------------------------------------------------|------------------------------------------------------------------------------------------------------------------------------------------|
| Runoff                              | qtot (kg m <sup>-2</sup> s <sup>-1</sup> ) / daily       | CLM4.5, CLM5.0, CWatM, DBH, H08, JULES-W1, LPJmL, Mac-PDM.20, MATSIRO, mHM, MPI-HM, ORCHIDEE, PCR-GLOBWB, WaterGAP2, WAYS                |
| Surface runoff                      | qs (kg m <sup>-2</sup> s <sup>-1</sup> ) / monthly       | CLM4.5, CLM5.0, CWatM, DBH, H08, JULES-W1, LPJmL, Mac-PDM.20, MATSIRO, MPI-HM, ORCHIDEE, PCR-GLOBWB, WaterGAP2, WAYS                     |
| Subsurface runoff                   | qsb (kg m <sup>-2</sup> s <sup>-1</sup> ) / monthly      | CLM4.5, CLM5.0, CWatM, DBH, H08, JULES-W1, LPJmL, Mac-PDM.20, MATSIRO, mHM, MPI-HM, ORCHIDEE, ORCHIDEE-DGVM, PCR-GLOBWB, WaterGAP2, WAYS |
| Groundwater recharge                | qr (kg m <sup>-2</sup> s <sup>-1</sup> ) / monthly       | CLM4.5, CLM5.0, CWatM, DBH, H08, JULES-W1, LPJmL, MATSIRO, mHM, MPI-HM, ORCHIDEE, PCR-GLOBWB, WaterGAP2, WAYS                            |
| Groundwater runoff                  | qg (kg m <sup>-2</sup> s <sup>-1</sup> ) / monthly       | CLM4.5, CLM5.0, CWatM, DBH, H08, JULES-W1, LPJmL, MATSIRO, mHM, MPI-HM, ORCHIDEE, PCR-GLOBWB, WaterGAP2, WAYS                            |
| Discharge (gridded)                 | dis (m <sup>3</sup> s <sup>-1</sup> )                    | CLM4.5, CLM5.0, CWatM, DBH, H08, LPJmL, MATSIRO, mHM, MPI-HM, ORCHIDEE, PCR-GLOBWB, WaterGAP2                                            |
| Monthly maximum of daily discharge  | maxdis (m <sup>3</sup> s <sup>-1</sup> ) / monthly       | CLM4.5, CLM5.0, CWatM, DBH, H08, JULES-W1, LPJmL, MATSIRO, mHM, MPI-HM, ORCHIDEE, PCR-GLOBWB, WaterGAP2                                  |
| Monthly minimum of daily discharge  | mindis (m <sup>3</sup> s <sup>-1</sup> ) / monthly       | CLM4.5, CLM5.0, CWatM, DBH, H08, JULES-W1, LPJmL, MATSIRO, mHM, MPI-HM, ORCHIDEE, PCR-GLOBWB, WaterGAP2                                  |
| Evapotranspiration                  | evap (kg m <sup>-2</sup> s <sup>-1</sup> ) / monthly     | CLM4.5, CLM5.0, CWatM, DBH, H08, JULES-W1, LPJmL, Mac-PDM.20, MATSIRO, mHM, MPI-HM, ORCHIDEE, PCR-GLOBWB, WaterGAP2, WAYS                |
| Potential Evapotranspiration        | potevap (kg m <sup>-2</sup> s <sup>-1</sup> ) / monthly  | CLM4.5, CLM5.0, CWatM, DBH, H08, JULES-W1, LPJmL, Mac-PDM.20, MATSIRO, mHM, MPI-HM, ORCHIDEE, PCR-GLOBWB, WaterGAP2, WAYS                |
| Soil moisture                       | soilmoist (kg m <sup>-2</sup> ) / monthly                | CLM4.5, CLM5.0, CWatM, DBH, H08, JULES-W1, LPJmL, Mac-PDM.20, MATSIRO, mHM, MPI-HM, ORCHIDEE, PCR-GLOBWB, WaterGAP2                      |
| Soil moisture, root zone            | rootmoist (kg m <sup>-2</sup> ) / monthly                | CLM4.5, CLM5.0, CWatM, DBH, H08, JULES-W1, LPJmL, Mac-PDM.20, MATSIRO, mHM, MPI-HM, ORCHIDEE, PCR-GLOBWB, WaterGAP2, WAYS                |
| Frozen soil moisture for each layer | soilmoistfroz (kg m <sup>-2</sup> ) / monthly            | CLM4.5, CLM5.0, CWatM, DBH, H08, JULES-W1, LPJmL, MATSIRO, ORCHIDEE, PCR-GLOBWB, WaterGAP2                                               |
| Temperature of Soil                 | tsl (K)                                                  | CLM4.5, CLM5.0, CWatM, DBH, H08, JULES-W1, LPJmL, MATSIRO, ORCHIDEE, PCR-GLOBWB, WaterGAP2                                               |
| Snow depth                          | snd (m) / monthly                                        | CLM4.5, CLM5.0, CWatM, DBH, H08, JULES-W1, LPJmL, MATSIRO, mHM, MPI-HM, ORCHIDEE, PCR-GLOBWB, WaterGAP2                                  |
| Snow water equivalent               | swe (kg m <sup>-2</sup> ) / monthly                      | CLM4.5, CLM5.0, CWatM, DBH, H08, JULES-W1, LPJmL, MATSIRO, mHM, MPI-HM, ORCHIDEE, PCR-GLOBWB, WaterGAP2                                  |
| Total water storage                 | tws (kg m <sup>-2</sup> ) / monthly                      | CLM4.5, CLM5.0, CWatM, DBH, JULES-W1, LPJmL, MATSIRO, MPI-HM, ORCHIDEE, PCR-GLOBWB, WaterGAP2                                            |
| Canopy water storage                | canopystor / monthly                                     | CLM4.5, CLM5.0, CWatM, DBH, JULES-W1, LPJmL, MATSIRO, ORCHIDEE, PCR-GLOBWB, WaterGAP2, WAYS                                              |
| Glacier storage                     | glacierstor / monthly                                    | CLM4.5, CLM5.0, CWatM                                                                                                                    |
| Groundwater storage                 | groundwstor / monthly                                    | CLM4.5, CLM5.0, CWatM, DBH, H08, JULES-W1, LPJmL, MATSIRO, mHM, ORCHIDEE, PCR-GLOBWB, WaterGAP2                                          |
| Lake storage                        | lakestor / monthly                                       | CLM4.5, CLM5.0, CWatM, MATSIRO, WaterGAP2                                                                                                |
| Wetland storage                     | wetlandstor / monthly                                    | CLM4.5, CLM5.0, CWatM, MPI-HM, ORCHIDEE, PCR-GLOBWB, WaterGAP2                                                                           |
| Reservoir storage                   | reservoirstor / monthly                                  | CWatM, DBH, H08, LPJmL, MATSIRO, PCR-GLOBWB, WaterGAP2                                                                                   |
| Annual maximum daily thaw depth     | thawdepth (m) / monthly                                  | CLM4.5, CLM5.0, CWatM, DBH, LPJmL, MATSIRO, ORCHIDEE,                                                                                    |
| River storage                       | riverstor / monthly                                      | CLM4.5, CLM5.0, CWatM, DBH, H08, LPJmL, MATSIRO, MPI-HM, ORCHIDEE, PCR-GLOBWB, WaterGAP2                                                 |
| Rainfall                            | rainf (kg m <sup>-2</sup> s <sup>-1</sup> ) / monthly    | CLM4.5, CLM5.0, CWatM, DBH, H08, JULES-W1, LPJmL, MATSIRO, mHM, MPI-HM, ORCHIDEE, PCR-GLOBWB, WaterGAP2, WAYS                            |
| Snowfall                            | snowf (kg m <sup>-2</sup> s <sup>-1</sup> ) / monthly    | CLM4.5, CLM5.0, CWatM, DBH, H08, JULES-W1, LPJmL, Mac-PDM.20, MATSIRO, mHM, MPI-HM, ORCHIDEE, PCR-GLOBWB, WaterGAP2, WAYS                |
| Leaf Area Index                     | lai (-) / monthly                                        | CLM45, ORCHIDEE, WAYS                                                                                                                    |

**Table S92. Water management variables of the ISMIP2b global water models<sup>1</sup> with a spatial resolution of 0.5°x0.5° and a monthly temporal resolution**

| Output variable                                                        | ISMIP2b protocol Symbol (Units) /<br>Temporal resolution | Models                                                                               |
|------------------------------------------------------------------------|----------------------------------------------------------|--------------------------------------------------------------------------------------|
| Irrigation water demand<br>(=potential irrigation water<br>Withdrawal) | pirrww (kg m <sup>-2</sup> s <sup>-1</sup> )             | CLM4.5, CLM5.0, CWatM, DBH, H08, LPJmL,<br>MATSIRO, MPI-HM, PCR-GLOBWB,<br>WaterGAP2 |
| Actual irrigation water<br>withdrawal                                  | airrww (kg m <sup>-2</sup> s <sup>-1</sup> )             | CLM4.5, CLM5.0, CWatM, DBH, H08, LPJmL,<br>MATSIRO, MPI-HM, PCR-GLOBWB               |
| Potential irrigation water<br>consumption                              | pirruse (kg m <sup>-2</sup> s <sup>-1</sup> )            | CLM4.5, CLM5.0, CWatM, DBH, H08, LPJmL,<br>MATSIRO, MPI-HM, PCR-GLOBWB,<br>WaterGAP2 |
| Actual irrigation water<br>consumption                                 | airruse (kg m <sup>-2</sup> s <sup>-1</sup> )            | CLM4.5, CLM5.0, CWatM, DBH, H08, LPJmL,<br>MATSIRO, MPI-HM, PCR-GLOBWB               |
| Actual green water consumption<br>on<br>irrigated cropland             | airrusegreen (kg m <sup>-2</sup> s <sup>-1</sup> )       | CLM4.5, CLM5.0, CWatM, DBH, H08, LPJmL,<br>MATSIRO, PCR-GLOBWB                       |
| Potential green water<br>consumption on irrigated<br>cropland          | pirrusegreen (kg m <sup>-2</sup> s <sup>-1</sup> )       | CLM4.5, CLM5.0, CWatM, DBH, H08, LPJmL,<br>MATSIRO, PCR-GLOBWB                       |
| Actual green water consumption<br>on rainfed cropland                  | arainfusegreen (kg m <sup>-2</sup> s <sup>-1</sup> )     | CLM4.5, CLM5.0, CWatM, DBH, H08, LPJmL,<br>MATSIRO, PCR-GLOBWB                       |
| Actual domestic water<br>withdrawal                                    | adomww (kg m <sup>-2</sup> s <sup>-1</sup> )             | CWatM, H08, MATSIRO, PCR-GLOBWB                                                      |
| Actual domestic water<br>consumption                                   | adomuse (kg m <sup>-2</sup> s <sup>-1</sup> )            | CWatM, H08, MATSIRO, PCR-GLOBWB                                                      |
| Actual manufacturing water<br>withdrawal                               | amanww (kg m <sup>-2</sup> s <sup>-1</sup> )             | CWatM, H08, MATSIRO, PCR-GLOBWB                                                      |
| Actual Manufacturing water<br>consumption                              | amanuse (kg m <sup>-2</sup> s <sup>-1</sup> )            | CWatM, H08, MATSIRO, PCR-GLOBWB                                                      |
| Actual electricity water<br>withdrawal                                 | aelecww (kg m <sup>-2</sup> s <sup>-1</sup> )            | CWatM, H08, PCR-GLOBWB                                                               |
| Actual electricity water<br>consumption                                | aelecuse (kg m <sup>-2</sup> s <sup>-1</sup> )           | CWatM, H08, PCR-GLOBWB                                                               |
| Actual livestock water<br>withdrawal                                   | aliveww (kg m <sup>-2</sup> s <sup>-1</sup> )            | CWatM, H08, PCR-GLOBWB                                                               |
| Actual livestock water<br>consumption                                  | aliveuse (kg m <sup>-2</sup> s <sup>-1</sup> )           | CWatM, H08, PCR-GLOBWB                                                               |
| Total (all sectors) actual water<br>consumption                        | atotuse (kg m <sup>-2</sup> s <sup>-1</sup> )            | CWatM, H08, PCR-GLOBWB, WaterGAP2                                                    |
| Total (all sectors) actual water<br>withdrawal                         | atotww (kg m <sup>-2</sup> s <sup>-1</sup> )             | CWatM, H08, PCR-GLOBWB, WaterGAP2                                                    |
| Total (all sectors) water demand<br>(=potential water withdrawal)      | ptotww (kg m <sup>-2</sup> s <sup>-1</sup> )             | CWatM, H08, PCR-GLOBWB, WaterGAP2                                                    |
| Total (all sectors) potential water<br>consumption                     | ptotuse (kg m <sup>-2</sup> s <sup>-1</sup> )            | CWatM, H08, PCR-GLOBWB, WaterGAP2                                                    |
| Actual industrial water<br>consumption                                 | ainduse (kg m <sup>-2</sup> s <sup>-1</sup> )            | CWatM, PCR-GLOBWB                                                                    |
| Potential domestic water<br>consumption                                | pdomuse (kg m <sup>-2</sup> s <sup>-1</sup> )            | H08                                                                                  |
| Potential manufacturing water<br>consumption                           | pmanuse (kg m <sup>-2</sup> s <sup>-1</sup> )            | H08                                                                                  |
| Actual industrial water<br>withdrawal                                  | aindww (kg m <sup>-2</sup> s <sup>-1</sup> )             | PCR-GLOBWB                                                                           |

<https://www.isimip.org/protocol/>

**Table S93. Human water use sectors included in the Global Water Models – Part I**

| Model                     | Irrigation                |   |                |                |   |                           |   |   |                |                | Livestock                 |   |   |                |                |                           |   |   |   |                | Domestic                  |   |   |   |                |                           |   |   |   |   |                |                |   |  |   |   |  |   |   |
|---------------------------|---------------------------|---|----------------|----------------|---|---------------------------|---|---|----------------|----------------|---------------------------|---|---|----------------|----------------|---------------------------|---|---|---|----------------|---------------------------|---|---|---|----------------|---------------------------|---|---|---|---|----------------|----------------|---|--|---|---|--|---|---|
|                           | Water withdrawal (source) |   |                |                |   | Return flow (destination) |   |   |                |                | Water withdrawal (source) |   |   |                |                | Return flow (destination) |   |   |   |                | Water withdrawal (source) |   |   |   |                | Return flow (destination) |   |   |   |   |                |                |   |  |   |   |  |   |   |
|                           | G                         | L | R <sub>e</sub> | R <sub>i</sub> | O | S                         | G | L | R <sub>e</sub> | R <sub>i</sub> | O                         | G | L | R <sub>e</sub> | R <sub>i</sub> | O                         | S | G | L | R <sub>e</sub> | R <sub>i</sub>            | O | G | L | R <sub>e</sub> | R <sub>i</sub>            | O | S | G | L | R <sub>e</sub> | R <sub>i</sub> | O |  |   |   |  |   |   |
| <b>CLM4.5</b>             |                           |   |                | ✓              |   |                           | ✓ | ✓ |                | ✓              |                           |   |   |                |                |                           |   |   |   |                |                           |   |   |   |                |                           |   |   |   |   |                |                |   |  |   |   |  |   |   |
| <b>CLM5.0</b>             |                           |   |                | ✓              |   |                           | ✓ | ✓ |                | ✓              |                           |   |   |                |                |                           |   |   |   |                |                           |   |   |   |                |                           |   |   |   |   |                |                |   |  |   |   |  |   |   |
| <i>CWatM</i>              | ✓                         | ✓ | ✓              | ✓              |   |                           | ✓ | ✓ |                | ✓              |                           | ✓ | ✓ | ✓              | ✓              |                           |   |   |   |                |                           |   |   |   |                | ✓                         | ✓ | ✓ | ✓ |   |                |                |   |  |   |   |  |   | ✓ |
| <i>H08</i>                | ✓                         |   |                | ✓              |   | ✓                         | ✓ | ✓ |                |                |                           |   |   |                |                |                           |   |   |   |                |                           |   |   |   |                | ✓                         | ✓ |   | ✓ | ✓ |                |                |   |  |   |   |  |   | ✓ |
| <u>LPJmL</u>              |                           | ✓ |                | ✓              |   |                           | ✓ |   |                | ✓              |                           |   |   |                |                |                           |   |   |   |                |                           |   |   |   |                |                           |   |   |   |   |                |                |   |  |   |   |  |   |   |
| <b>MATSIRO</b>            | ✓                         |   | ✓              | ✓              |   |                           | ✓ | ✓ |                |                |                           |   |   |                |                |                           |   |   |   |                |                           |   |   |   |                | ✓                         |   | ✓ | ✓ |   |                |                |   |  |   |   |  |   | ✓ |
| <i>MPI-HM<sup>1</sup></i> | ✓                         | ✓ |                | ✓              |   |                           |   |   |                |                |                           |   |   |                |                |                           |   |   |   |                |                           |   |   |   |                |                           |   |   |   |   |                |                |   |  |   |   |  |   |   |
| <i>PCR-GLOBWB</i>         | ✓                         | ✓ | ✓              | ✓              |   |                           | ✓ | ✓ |                |                |                           | ✓ | ✓ | ✓              | ✓              |                           | ✓ |   |   |                |                           |   |   |   |                | ✓                         | ✓ | ✓ | ✓ |   |                | ✓              |   |  |   |   |  |   |   |
| <i>WaterGAP2</i>          | ✓                         | ✓ | ✓              | ✓              |   |                           | ✓ | ✓ | ✓              | ✓              |                           |   | ✓ | ✓              | ✓              |                           |   |   |   |                |                           |   |   |   |                | ✓                         | ✓ | ✓ | ✓ |   |                | ✓              |   |  | ✓ | ✓ |  | ✓ |   |

**Legend:** G = groundwater; L = lake; O = ocean; R<sub>e</sub> = reservoir; R<sub>i</sub> = river; S = soil; **Bold** = LSMs; *Italic* = GHMs; Underline = DGVMs.

Note: 1: MPI-HM extracts water from the wetland storage, which includes the water stored in lakes.

**Table S94. Human water use sectors included in the Global Water Models – Part II**

| Model             | Manufacturing    |   |                |                |   |               |   |   |                |                | Electricity      |   |   |                |                |               |   |   |   |                | Desalination     |   |   |               |                |                |   |   |   |   |                |                |   |     |   |
|-------------------|------------------|---|----------------|----------------|---|---------------|---|---|----------------|----------------|------------------|---|---|----------------|----------------|---------------|---|---|---|----------------|------------------|---|---|---------------|----------------|----------------|---|---|---|---|----------------|----------------|---|-----|---|
|                   | Water withdrawal |   |                |                |   | Return flow   |   |   |                |                | Water withdrawal |   |   |                |                | Return flow   |   |   |   |                | Water withdrawal |   |   | Return flow   |                |                |   |   |   |   |                |                |   |     |   |
|                   | (source)         |   |                |                |   | (destination) |   |   |                |                | (source)         |   |   |                |                | (destination) |   |   |   |                | (source)         |   |   | (destination) |                |                |   |   |   |   |                |                |   |     |   |
|                   | G                | L | R <sub>e</sub> | R <sub>i</sub> | O | S             | G | L | R <sub>e</sub> | R <sub>i</sub> | O                | G | L | R <sub>e</sub> | R <sub>i</sub> | O             | S | G | L | R <sub>e</sub> | R <sub>i</sub>   | O | G | L             | R <sub>e</sub> | R <sub>i</sub> | O | S | G | L | R <sub>e</sub> | R <sub>i</sub> | O | ISW |   |
| <i>CWatM</i>      | ✓                | ✓ | ✓              | ✓              |   |               |   |   |                | ✓              |                  |   |   |                |                |               |   |   |   |                |                  |   |   |               |                |                |   |   |   |   |                |                |   |     |   |
| <i>H08</i>        | ✓                |   | ✓              | ✓              |   |               |   |   |                | ✓              |                  |   |   |                |                |               |   |   |   |                |                  |   |   |               |                |                |   | ✓ |   |   |                |                |   |     | ✓ |
| <b>MATSIRO</b>    | ✓                |   | ✓              | ✓              |   |               |   |   |                | ✓              |                  |   |   |                |                |               |   |   |   |                |                  |   |   |               |                |                |   |   |   |   |                |                |   |     |   |
| <i>PCR-GLOBWB</i> | ✓                | ✓ | ✓              | ✓              |   |               | ✓ |   |                |                |                  |   |   |                |                |               |   |   |   |                |                  |   |   |               |                |                |   |   |   |   |                |                |   |     |   |
| <i>WaterGAP2</i>  | ✓                | ✓ | ✓              | ✓              |   |               |   | ✓ | ✓              | ✓              |                  |   |   |                |                |               |   |   |   |                |                  |   |   |               |                |                |   |   |   |   |                |                |   |     |   |

**Legend:** G = groundwater; ISW = inland saline water; L = lake; O = ocean; R<sub>e</sub> = reservoir; R<sub>i</sub> = river; S = soil; **Bold** = LSMs; *Italic* = GHMs; Underline = DGVMs. CWatM and PCR-GLOBWB did not compute desalination for ISIMIP2b.

MATSIRO, PCR-GLOBWB, and CWatM combine manufacturing and electricity in industry sector.

**Desalination**

H08 computes seawater abstraction, consumption, and return flows for ISIMIP2b (Tables S81–S83) (Hanasaki et al., 2018). Seawater abstraction represents the sum of seawater abstraction for the municipal and industry sectors. Three conditions must be met in order to use desalination: i) GDP > USD 14,000 person year<sup>-1</sup> in terms of purchasing power parity (PPP); ii) humidity index below 8%; iii) within three grid cells of the seashore. It is assumed that seawater desalination is not used for irrigation and that all demand for municipal and industrial water is abstracted by desalination if available. In the context that desalination is not used for irrigation, seawater consumption represents seawater abstraction weighted by the ratio of consumption to withdrawal, which is equal to 0.1 and 0.15 for industrial and municipal water use. Return flow from seawater abstraction represents seawater abstraction weighted by the non-used fraction (0.1 and 0.15 for industrial and municipal water use) and proportion lost during delivery (set to zero).

H08 used the canal (aqueduct) scheme for ISIMIP2b.



**Table S95. Potential future research in global hydrological modeling – Part I**

| Model             | Input data | Output data | Temporal resolution | Spatial resolution | Calibration | Canopy storage | Soil storage | Snow storage | Glacier storage |
|-------------------|------------|-------------|---------------------|--------------------|-------------|----------------|--------------|--------------|-----------------|
| <b>CLM4.5</b>     | ✓          | ✓           |                     |                    | ✓           | ✓              | ✓            |              |                 |
| <b>CLM5.0</b>     | ✓          | ✓           |                     |                    | ✓           | ✓              | ✓            |              |                 |
| <i>CWatM</i>      |            | ✓           |                     |                    | ✓           |                |              |              |                 |
| <b>DBH</b>        | ✓          | ✓           |                     |                    | ✓           |                |              |              |                 |
| <i>H08</i>        | ✓          |             |                     | ✓                  | ✓           |                |              |              |                 |
| <b>JULES-W1</b>   |            | ✓           |                     |                    | ✓           |                |              |              |                 |
| <u>LPJmL</u>      | ✓          | ✓           |                     | ✓                  |             |                |              |              |                 |
| <i>Mac-PDM.20</i> |            |             |                     |                    |             |                |              |              |                 |
| <b>MATSIRO</b>    | ✓          | ✓           |                     |                    |             |                |              |              |                 |
| <i>mHM</i>        |            |             |                     |                    |             |                |              | ✓            | ✓               |
| <i>MPI-HM</i>     |            |             |                     | ✓                  |             | ✓              |              |              |                 |
| <b>ORCHIDEE</b>   |            |             |                     |                    | ✓           |                |              |              |                 |
| <i>PCR-GLOBWB</i> | ✓          |             | ✓                   | ✓                  |             |                | ✓            | ✓            |                 |
| <i>VIC</i>        |            |             |                     |                    |             |                |              |              |                 |
| <i>WaterGAP2</i>  | ✓          | ✓           |                     |                    |             |                |              |              |                 |
| <i>WAYS</i>       |            |             |                     |                    |             |                |              |              |                 |

**Legend:** **Bold** = LSMs, *Italic* = GHMs, Underline = DGVMs.

**Table S96. Potential future research in global hydrological modeling – Part II**

| Model             | Groundwater storage | River storage | Runoff scheme | Lakes storage | Reservoir storage | Wetland storage | Water use model |
|-------------------|---------------------|---------------|---------------|---------------|-------------------|-----------------|-----------------|
| <b>CLM4.5</b>     | ✓                   | ✓             | ✓             | ✓             | ✓                 | ✓               | ✓               |
| <b>CLM5.0</b>     | ✓                   | ✓             | ✓             | ✓             | ✓                 | ✓               | ✓               |
| <i>CWatM</i>      |                     |               |               |               |                   |                 |                 |
| <b>DBH</b>        |                     |               |               | ✓             |                   | ✓               | ✓               |
| <i>H08</i>        |                     |               |               |               |                   |                 |                 |
| <b>JULES-W1</b>   |                     | ✓             | ✓             |               |                   |                 |                 |
| <u>LPJmL</u>      |                     |               |               |               |                   |                 |                 |
| <i>Mac-PDM.20</i> |                     |               |               |               |                   |                 | ✓               |
| <b>MATSIRO</b>    | ✓                   |               |               |               |                   |                 | ✓               |
| <i>mHM</i>        | ✓                   |               |               | ✓             | ✓                 | ✓               | ✓               |
| <i>MPI-HM</i>     |                     |               |               |               | ✓                 |                 |                 |
| <b>ORCHIDEE</b>   |                     |               |               |               |                   |                 |                 |
| <i>PCR-GLOBWB</i> | ✓                   |               | ✓             |               | ✓                 |                 |                 |
| <i>VIC</i>        | ✓                   |               |               |               | ✓                 |                 | ✓               |
| <i>WaterGAP2</i>  | ✓                   |               |               |               |                   |                 | ✓               |
| <i>WAYS</i>       |                     |               |               |               |                   |                 | ✓               |

**Legend:** **Bold** = LSMs, *Italic* = GHMs, Underline = DGVMs.

We synthesized some challenges in water modelling by reviewing articles published by the climate, global hydrological, and vegetation communities. We classified these according to the 23 unsolved problems in hydrology (UPH) identified by Blöschl et al., 2019 (Table S97), to harmonize the efforts of the global and catchment hydrological communities. Briefly, these challenges can be overcome through innovative and creative collaboration among communities and investment in technical infrastructure. In the end, hydrology is an *inexact* science influenced by *aleatory* (random) and *epistemic* (lack of knowledge) uncertainties (Beven, 2018).

References:

Beven, K. (2018). On hypothesis testing in hydrology: Why falsification of models is still a really good idea. *Wiley Interdisciplinary Reviews:Water*,5(3), e1278.  
 Blöschl G, et al.: Twenty-three Unsolved Problems in Hydrology (UPH) – A community perspective. *Hydrological Sciences Journal* 64(1):1141–1158. <https://doi.org/10.1080/02626667.2019.1620507>, 2019.

**Table S97 Challenges of global hydrological modelling overlapping with unsolved problems in hydrology**

|                                                                                                                                                                                                                                                                                                                                                                                                                                                                                                                                                                                                                                                                                                                                                                                                                                                                                                                                                                                                                                                                                                                                                                                                                                                                                                                                                                                                                                                                                                                                                                                                                                                                                                                                                                          | <b>Challenges of hydrological modelling</b>                                                                                                                                                                                                                                                                                                                                                                                                                                                                                                                                                                                                                                                                                                                                                                                                                                                                                                                                                                                                                                                                                                                                                                                                                                                                                                                                                                                                                                                                                                                                                                                                                                                                                                                                                                                                                                                                                                                                                                                                                                                                                                                                                                                                                                                                                                                                                                                                                                                                                                                                                                                                                                                                                                                                                                                                                                                                                                                                                                                                                                                                                                                                                                                                                                                                                                                                                                                                                                                                                                                                                                                                                                                                                                                                                                                                                                                                                                                                                                                                                                                                                                                                                                                                                                                                                                                                                                                                                                                                                                                                                                                                                                                                                                                                                                                                                                                                                                 |
|--------------------------------------------------------------------------------------------------------------------------------------------------------------------------------------------------------------------------------------------------------------------------------------------------------------------------------------------------------------------------------------------------------------------------------------------------------------------------------------------------------------------------------------------------------------------------------------------------------------------------------------------------------------------------------------------------------------------------------------------------------------------------------------------------------------------------------------------------------------------------------------------------------------------------------------------------------------------------------------------------------------------------------------------------------------------------------------------------------------------------------------------------------------------------------------------------------------------------------------------------------------------------------------------------------------------------------------------------------------------------------------------------------------------------------------------------------------------------------------------------------------------------------------------------------------------------------------------------------------------------------------------------------------------------------------------------------------------------------------------------------------------------|---------------------------------------------------------------------------------------------------------------------------------------------------------------------------------------------------------------------------------------------------------------------------------------------------------------------------------------------------------------------------------------------------------------------------------------------------------------------------------------------------------------------------------------------------------------------------------------------------------------------------------------------------------------------------------------------------------------------------------------------------------------------------------------------------------------------------------------------------------------------------------------------------------------------------------------------------------------------------------------------------------------------------------------------------------------------------------------------------------------------------------------------------------------------------------------------------------------------------------------------------------------------------------------------------------------------------------------------------------------------------------------------------------------------------------------------------------------------------------------------------------------------------------------------------------------------------------------------------------------------------------------------------------------------------------------------------------------------------------------------------------------------------------------------------------------------------------------------------------------------------------------------------------------------------------------------------------------------------------------------------------------------------------------------------------------------------------------------------------------------------------------------------------------------------------------------------------------------------------------------------------------------------------------------------------------------------------------------------------------------------------------------------------------------------------------------------------------------------------------------------------------------------------------------------------------------------------------------------------------------------------------------------------------------------------------------------------------------------------------------------------------------------------------------------------------------------------------------------------------------------------------------------------------------------------------------------------------------------------------------------------------------------------------------------------------------------------------------------------------------------------------------------------------------------------------------------------------------------------------------------------------------------------------------------------------------------------------------------------------------------------------------------------------------------------------------------------------------------------------------------------------------------------------------------------------------------------------------------------------------------------------------------------------------------------------------------------------------------------------------------------------------------------------------------------------------------------------------------------------------------------------------------------------------------------------------------------------------------------------------------------------------------------------------------------------------------------------------------------------------------------------------------------------------------------------------------------------------------------------------------------------------------------------------------------------------------------------------------------------------------------------------------------------------------------------------------------------------------------------------------------------------------------------------------------------------------------------------------------------------------------------------------------------------------------------------------------------------------------------------------------------------------------------------------------------------------------------------------------------------------------------------------------------------------------------------|
| <p><b>Time variability and change (Blöschl et al., 2019)</b></p> <p>1. Is the hydrological cycle regionally accelerating/decelerating under climate and environmental change, and are there tipping points (irreversible changes)?</p> <p>2. How will cold region runoff and groundwater change in a warmer climate (e.g. with glacier melt and permafrost thaw)?</p> <p>3. What are the mechanisms by which climate change and water use alter ephemeral rivers and groundwater in (semi-) arid regions?</p> <p><b>Measurements and data (Blöschl et al., 2019)</b></p> <p>16. How can we use innovative technologies to measure surface and subsurface properties, states, and fluxes at a range of spatial and temporal scales?</p> <p>18. How can we extract information from available data on human and water systems in order to inform the building process of socio-hydrological models and conceptualizations?</p> <p><b>Modelling methods (Blöschl et al., 2019)</b></p> <p>19. How can hydrological models be adapted to be able to extrapolate to changing conditions, including changing vegetation dynamics?</p> <p>20. How can we disentangle and reduce model structural/parameter/input uncertainty in hydrological prediction?</p> <p><b>Interfaces with society (Blöschl et al., 2019)</b></p> <p>21. How can the (un)certainly in hydrological predictions be communicated to decision makers and the general public?</p> <p>22. What are the synergies and tradeoffs between societal goals related to water management (e.g. water–environment–energy–food–health)?</p> <p>23. What is the role of water in migration, urbanisation and the dynamics of human civilisations, and what are the implications for contemporary water management?</p> | <p><b>Challenges of simulating terrestrial water cycle on the global scale, identified through the present study</b></p> <p><b>a.</b> couple the climate and hydrological models, having climate feedback from the hydrological models (Ning et al., 2019);</p> <p><b>b.</b> add glacial meltwater runoff (Schewe et al., 2019; Huss and Hock, 2018; Zekollari et al., 2019; Cáceres et al., 2020);</p> <p><b>c.</b> couple the climate, lands use, hydrology, and human components including their feedbacks and interactions (Nazemi &amp; Wheeler, 2015; Pokhrel et al., 2016; Wada et al., 2017; Thiery et al., 2017; 2020 a and b);</p> <p><b>d.</b> land-use dynamics scheme (Sood and Smakhtin, 2015)</p> <p><b>Challenges of simulating terrestrial water cycle on the global scale, identified through the present study</b></p> <p><b>e.</b> perform the GWMs at a high resolution of 1 km than 55 km (Wood et al., 2011; Bierkens 2015; Beven et al., 2015; Wada et al., 2016; Burek et al., 2020);</p> <p><b>f.</b> improve the quality of the input data, GRACE products (Murray et al., 2012; Scanlon et al., 2019);</p> <p><b>g.</b> make single-model sensitivity analyses (Gosling and Arnell, 2011; Müller Schmied et al. 2014; Pianosi et al., 2015; Cuntz et al., 2016);</p> <p><b>h.</b> make multi-parameterization of the single models or model compartments;</p> <p><b>j.</b> improve the simulation of the human impact on freshwater resources (Bierkens, 2015; Nazemi &amp; Wheeler, 2015; Döll et al., 2016; Wada et al., 2017; Masaki et al., 2017; Veldkamp et al., 2018);</p> <p><b>i.</b> distinguish between the groundwater source and surface water source for water abstractions and identify how the return flows recharge groundwater (Döll et al., 2016; Veldkamp et al., 2018; Scanlon et al., 2019).</p> <p><b>Challenges of simulating terrestrial water cycle on the global scale, identified through the present study</b></p> <p><b>k.</b> understand different model biases (errors) and their influence on the simulations identify and explain the strengths and weaknesses of individual models (fire community: Rabin et al., 2017);</p> <p><b>l.</b> assess the influence of the models' structure on simulations, go deep into equations, to improve the equations, and to create new equations;</p> <p><b>m.</b> improve the processes representation of the models, for example, incorporation of a dynamic groundwater scheme (Pokhrel et al., 2016; Scanlon et al., 2018, 2019);</p> <p><b>n.</b> add other processes in the models such as transmission losses, capillary rise, evaporation from small ephemeral ponds, dynamic response of vegetation to the climate change and CO<sub>2</sub> concentrations; improve the capture of the spatial pattern, intra and inter-annual variabilities; explain the reasons for different output results and use several types of data (e. g., GRACE, GPS, well observations, MODIS, Envisat) for multi-criteria validation (of the models' outputs), model calibration (models' parameters), data assimilation (Döll et al., 2003; Döll et al., 2015; Döll et al., 2016; Vanderkelen et al., 2020);</p> <p><b>o.</b> improve parameterizations by using parameter transfer method, multiscale parameter regionalization (Samaniago et al., 2010), or by using stepwise parameter estimation (Arheimer et al., 2020);</p> <p><b>p.</b> add floodplain storage and wetland evaporation; to develop or open new data sets on “interbasin transfers, regional water distribution network, river cross-sectional dimensions, and hydrogeological subsurface properties” (Bierkens, 2015, page 4942);</p> <p><b>q.</b> weight individual models based upon their performance (Zaherpour et al., 2019)</p> <p><b>r.</b> identify hidden parameters in the code (Mendoza et al., 2015)</p> <p><b>Challenges of simulating terrestrial water cycle on the global scale, identified through the present study</b></p> <p><b>s.</b> evaluate the models' performance, for example, following the steps proposed by Krysanova et al., 2018 or to create new feasible steps for GWMs taking into account their shortcomings (Zaherpour et al., 2018 and 2019) or evaluating them for several scales and gauge stations (Samaniago et al., 2017);</p> <p><b>t.</b> compare with the outputs of the high-resolution continental scale models (for example, Parflow) (Scanlon et al., 2018);</p> <p><b>u.</b> complement the global studies with regional studies (Gosling et al., 2011; Gosling et al., 2017; Hatterman et al., 2017);</p> <p><b>v.</b> connect the GWMs with socio-economic and energy models (Calvin et al., 2013; Burek et al., 2020);</p> <p><b>x.</b> identify and explain the strengths and weaknesses of multi-model ensembles, individual model compartments (Clark et al., 2011; Niu et al., 2011; Essery et al., 2013);</p> |

## References:

- Arheimer, B., Pimentel, R., Isberg, K., Crochemore, L., Andersson, J. C. M., Hasan, A., and Pineda, L.: Global catchment modelling using World-Wide HYPE (WWH), open data, and stepwise parameter estimation, *Hydrol. Earth Syst. Sci.*, 24, 535–559, <https://doi.org/10.5194/hess-24-535-2020>, 2020.
- Beven, K., Pappenberger, F. C. H., Lamb, R., and Hunter, N., Hyperresolution information and hyperresolution ignorance in modelling the hydrology of the land surface, *Sci. China Earth Sci.*, 58, 25–35, <https://doi.org/10.1007/s11430-014-5003-4>, 2015.
- Bierkens, M. F. P.: Global hydrology 2015: State, trends, and directions, *Water Resources Research*, 51, 7, 4923–4947, <https://doi.org/10.1002/2015WR017173>, 2015.
- Blöschl G, Bierkens, M. F.P., Chambel, A. et al.: Twenty-three Unsolved Problems in Hydrology (UPH) – A community perspective, *Hydrological Sciences Journal* 64(1), 1141–1158, <https://doi.org/10.1080/02626667.2019.1620507>, 2019.
- Burek, P., Satoh, Y., Kahil, T., Tang, T., Greve, P., Smilovic, M., Guillaumot, L., Zhao, F., and Wada, Y.: Development of the Community Water Model (CWatM v1.04) - a high-resolution hydrological model for global and regional assessment of integrated water resources management, *Geosci. Model Dev.*, 13, 3267–3298, <https://doi.org/10.5194/gmd-13-3267-2020>, 2020.
- Calvin, K., Wise, M., Clarke, L., Edmonds, J., Kyle, P., Luckow, P., and Thomson, A.: Implications of simultaneously mitigating and adapting to climate change: initial experiments using GCAM, *Climatic Change*, 117, 545–560, <https://doi.org/10.1007/s10584-012-0650-y>, 2013.
- Cáceres, D., Marzeion, B., Malles, J. H., Gutknecht, B. D., Müller Schmied, H., and Döll, P.: Assessing global water mass transfers from continents to oceans over the period 1948–2016, *Hydrol. Earth Syst. Sci.*, 24, 4831–4851, <https://doi.org/10.5194/hess-24-4831-2020>, 2020.
- Clark, M.P., Kavetski, D., and Fenicia, F.: Pursuing the method of multiple working hypotheses for hydrological modeling, *Water Resources Research*, 47, W09301, <https://doi.org/10.1029/2010WR009827>, 2011.
- Cuntz, M., J. Mai, L. Samaniego, M. Clark, V. Wulfmeyer, O. Branch, S. Attinger, and S. Thober: The impact of standard and hard-coded parameters on the hydrologic fluxes in the Noah-MP land surface model, *J. Geophys. Res-Atmos*, 121(18), 10676–10700, <https://doi.org/10.1002/2016JD025097>, 2016.
- Döll, P., Kaspar, F., and Lehner, B.: A global hydrological model for deriving water availability indicators: model tuning and validation, *Journal of Hydrology*, 270, 05–134, [https://doi.org/10.1016/S0022-1694\(02\)00283-4](https://doi.org/10.1016/S0022-1694(02)00283-4), 2003.
- Döll, P., Jiménez-Cisneros, B., Oki, T., et al.: Integrating risks of climate change into water management, *Hydrological Sciences Journal*, 60:1, 4–13, <http://dx.doi.org/10.1080/02626667.2014.967250>, 2015.
- Döll, P., Douville, H., Güntner, A., Müller Schmied, H., and Wada, Y.: Modelling Freshwater Resources at the Global Scale: Challenges and Prospects, *Surv. Geophys.*, 37, 195–221, <https://doi.org/10.1007/s10712-015-9343-1>, 2016.
- Essery, R., Morin, S., Lejeune, Y., and Ménard, C.B.: A comparison of 1701 snow models using observations from an alpine site, *Advances in water resources*, 55, 131–148, <https://doi.org/10.1016/j.advwatres.2012.07.013>, 2013.
- Gosling, S. N., Taylor, R. G., Arnell, N. W., and Todd, M. C.: A comparative analysis of projected impacts of climate change on river runoff from global and catchment-scale hydrological models, *Hydrol. Earth Syst. Sci.*, 15, 279–294, <https://doi.org/10.5194/hess-15-279-2011>, 2011.
- Gosling, S. N, Zaherpour, J., Mount, N. J., Hattermann, F., Dankers, R., Arheimer, B., Breuer, L., Haddeland, I., Kumar, R., Kundu, D., Liu, J., van Griensven, A., Veldkamp, T., Vetter, T., Wang, X., and Zhang, X.: A comparison of changes in river runoff from multiple global and catchmentscale hydrological models under global warming scenarios of 1°C, 2°C and 3°C. *Clim Chang.*, doi:10.1007/s10584-016-1773-3, 2017.
- Hattermann, F. F, Krysanova, V., Gosling, S. N., Dankers, R., Daggupati, P., Donnelly, C., Flörke, M., Huang, Sh., Motovilov, Y., Buda, S., Yang, T., Müller, C., Leng, G., Tang, Q., Portmann, F. T., Hagemann, S., Gerten, D., Wada, Y.,

Masaki, Y., Alemayehu, T., Satoh, Y., and Samaniego, L.: Cross-scale intercomparison of climate change impacts simulated by regional and global hydrological models in eleven large river basins. *Clim Chang*. doi.10.1007/s10584-016-1829-4, 2017.

Huss, M. and Hock, R.: Global-scale hydrological response to future glacier mass loss, *Nature Climate Change*, 8(2), 135–140, <https://doi.org/10.1038/s41558-017-0049-x>, 2018.

Krysanova, V., Donnelly, C., Gelfan, A., Gerten, D., Arheimer, B., Hattermann, F., and Kundzewicz, Z. W.: How the performance of hydrological models relates to credibility of projections under climate change, *Hydro. Scie. J.*, 63:5, 696–720, <https://doi.org/10.1080/02626667.2018.1446214>, 2018.

Masaki, Y., Hanasaki, N., Biemans, H., Müller Schmied, H., Tang, Q., Wada, Y., Gosling, S. N., Takahashi, K. and Hijikata, Y.: Intercomparison of global river discharge simulations focusing on dam operation—multiple models analysis in two case study river basins, Missouri–Mississippi and Green–Colorado, *Environ. Res. Lett.* 12, 1–17, <https://doi.org/10.1088/1748-9326/aa57a8>, 2017.

Mendoza, P. A., Clark, M. P., Barlage, M., Rajagopalan, B., Samaniego, L., Abramowitz, G., and Gupta, H.: Are we unnecessarily constraining the agility of complex process-based models?, *Water Resour. Res.*, 51(1), 716–728, <https://doi.org/10.1002/2014WR015820>, 2015.

Murray, S. J., Foster, P.N., and Prentice, I. C.: Future global water resources with respect to climate change and water withdrawals as estimated by a dynamic global vegetation model, *Journal of Hydrology*, 448–449, 14–29, <http://dx.doi.org/10.1016/j.jhydrol.2012.02.044>, 2012.

Müller Schmied, H., Eisner, S., Franz, D., Wattenbach, M., Portmann, F. T., Flörke, M., and Döll, P.: Sensitivity of simulated global-scale freshwater fluxes and storages to input data, hydrological model structure, human water use and calibration, *Hydrol. Earth Syst. Sci.*, 18, 3511–3538, <https://doi.org/10.5194/hess-18-3511-2014>, 2014.

Nazemi, A. and Wheeler, H. S.: On inclusion of water resource management in Earth system models – Part 1: Problem definition and representation of water demand, *Hydrol. Earth Syst. Sci.*, 19, 33–61, <https://doi.org/10.5194/hess-19-33-2015>, 2015.

Ning, L., Zhan, C., Luo, Y., Yueling, W., Liu, L.: A review of fully coupled atmosphere-hydrology simulations, *Journal of Geographical Sciences*, 29 (3), 465–47, DOI: <https://doi.org/10.1007/s11442-019-1610-5>, 2019.

Niu, G.-Y., Z.-L. Yang, Mitchell, K. E., Chen, F., Ek, M. B., Barlage, M., Kumar, A., Manning, K., Niyogi, D., Rosero, E., Tewari, M., Xia, Y.: The community Noah land surface model with multiparameterization options (Noah-MP): 1. Model description and evaluation with local-scale measurements, *Journal of Geophysical Research: Atmospheres*, 116, D12, <https://doi.org/10.1029/2010JD015139>, 2011.

Pianosi, F., Sarrazin, F., and Wagener, T.: A Matlab toolbox for Global Sensitivity Analysis, *Environmental Modelling & Software*, 70, 80–85, <http://dx.doi.org/10.1016/j.envsoft.2015.04.009>, 2015.

Pokhrel, Y. N., Hanasaki, N., Wada, Y., and Kim, H.: Recent progresses in incorporating human land-water management into global land surface models toward their integration into Earth system models. *WIREs Water*, 3, 4, 548–574, <https://doi.org/10.1002/wat2.1150>, 2016.

Rabin, S. S., Melton, J. R., Lasslop, G., Bachelet, D., Forrest, M., Hantson, S., Kaplan, J. O., Li, F., Mangeon, S., Ward, D. S., Yue, C., Arora, V. K., Hickler, T., Kloster, S., Knorr, W., Nieradzik, L., Spessa, A., Folberth, G. A., Sheehan, T., Voulgarakis, A., Kelley, D. I., Prentice, I. C., Sitch, S., Harrison, S., and Arneeth, A.: The Fire Modeling Intercomparison Project (FireMIP), phase 1: experimental and analytical protocols with detailed model descriptions, *Geosci. Model Dev.*, 10, 1175–1197, <https://doi.org/10.5194/gmd-10-1175-2017>, 2017.

Samaniego, L., Kumar, R., Thober, S., Rakovec, O., Zink, M., Wanders, N., Eisner, S., Müller Schmied, H., Sutanudjaja, E. H., Warrach-Sagi, K., and Attinger, S.: Toward seamless hydrologic predictions across spatial scales, *Hydrol. Earth Syst. Sci.*, 21, 4323–4346, <https://doi.org/10.5194/hess-21-4323-2017>, 2017.

Scanlon, B. R., Zhang, Z., Save, H. et al.: Global models underestimate large decadal declining and rising water storage trends relative to GRACE satellite data, *PNAS*, E1080–E1089, <https://doi.org/10.1073/pnas.1704665115>, 2018.

- Scanlon, B. R., Zhang, Z., Rateb, A., Sun, A., Wiese, D., Save, H., Beaudoin, H., Lo, M. H., Müller-Schmied, H., Döll, P., van Beek, R., Swenson, S., Lawrence, D., Croteau, M., and Reedy, R. C.: Tracking seasonal fluctuations in land water storage using global models and GRACE satellites. *Geophysical Research Letters*, 46, 5254–5264, <https://doi.org/10.1029/2018GL081836>, 2019.
- Schewe, J., Gosling, S. N., Reyer, Ch., Zhao, F., Ciais, Ph., Elliott, J., Francois, L., Huber, V., Lotze, H. K., Seneviratne, S. I., van Vliet, M. T. H., Vautard, R., Wada, Y., Breuer, L., Büchner, M., Carozza, D. A., Chang, J., Coll, M., Deryng, D., de Wit, A., Eddy, T. D., Folberth, Ch., Frieler, K., Friend, A. D., Gerten, D., Gudmundsson, L., Hanasaki, N., Ito, A., Khabarov, N., Kim, H., Lawrence, P., Morfopoulos, C., Müller, Ch., Müller Schmied, H., Orth, R., Ostberg, S., Pokhrel, Y., Pugh, T. A. M., Sakurai, G., Satoh, Y., Schmid, E., Stacke, T., Steenbeek, J., Steinkamp, J., Tang, Q., Tian, H., Tittensor, D. P., Volkholz, J., Wang, X., and Warszawski L.: State-of-the-art global models underestimate impacts from climate extremes, *Nat. Comm.*, 10, 1–14, <https://doi.org/10.1038/s41467-019-08745-6>, 2019.
- Sood, A. and Smakhtin, V.: Global hydrological models: a review, *Hydrological Sciences Journal*, 60:4, 549-565, <https://doi.org/10.1080/02626667.2014.950580>, 2015.
- Thiery, W., E. L. Davin, D. M. Lawrence, A. L. Hirsch, M. Hauser, and S. I. Seneviratne: Present-day irrigation mitigates heat extremes, *J. Geophys. Res. Atmos.*, 122, 1403–1422, <https://doi.org/10.1002/2016JD025740>, 2017.
- Thiery, W., Visser, A.J., Fischer, E.M., Hauser, M., Hirsch, A. L., Lawrence, D. M., Lejeune, Q., Davin, E. L., Seneviratne, S. I.: Warming of hot extremes alleviated by expanding irrigation, *Nat Commun* 11, 290, <https://doi.org/10.1038/s41467-019-14075-4>, 2020 a.
- Thiery, W., Visser, A. J., Fischer, E. M., Hauser, M., Hirsch, A. L., Lawrence, D. M., Lejeune, Q., Davin, E. L., and Seneviratne, S. I.: Warming of hot extremes alleviated by expanding irrigation. *Nat Commun* 11, 290 (2020). <https://doi.org/10.1038/s41467-019-14075-4>, 2020 b.
- Vanderkelen, I., van Lipzig, N.P.M., Lawrence, D.M., Droppers, B., Golub, M., Gosling, S.N., Janssen, A.B.G., Marce, R., Schmied, H.M., Perroud, M. and Pierson, D., Pokhrel, Y., Satoh, Y., Schewe, J., Seneviratne, S. I., Stepanenko, V. M., Tan, Z., Woolway, R. I., and Thiery, W.: Global heat uptake by inland waters, *Geophysical Research Letters*, 47, 1-10, <https://doi.org/10.1029/2020GL087867>, 2020.
- Veldkamp, T. I. E., Zhao, F., Ward, P. J., de Moel, H., Aerts, J. C. J. H., Müller Schmied, H., Portmann, F. T., Masaki, Y., Pokhrel, Y., Liu, X., Satoh, Y., Gerten, D., Gosling, S. N., Zaherpour, J., and Wada, Y.: Human impact parameterizations in global hydrological models improve estimates of monthly discharges and hydrological extremes: a multi-model validation study, *Environ. Res. Lett.*, 13, 1–7, <https://doi.org/10.1088/1748-9326/aab96f>, 2018.
- Wada, Y., de Graaf, I. E. M., and van Beek, L. P. H.: High-resolution modelling of human and climate impacts on global water resources, *J. Adv. Model Earth Sy.*, 8, 735–763, <https://doi.org/10.1002/2015MS000618>, 2016.
- Wada, Y., Bierkens, M. F. P., de Roo, A., Dirmeyer, P. A., Famiglietti, J. S., Hanasaki, N., Konar, M., Liu, J., Müller Schmied, H., Oki, T., Pokhrel, Y., Sivapalan, M., Troy, T. J., van Dijk, A. I. J. M., van Emmerik, T., Van Huijgevoort, M. H. J., Van Lanen, H. A. J., Vörösmarty, C. J., Wanders, N., and Wheeler, H.: Human–water interface in hydrological modelling: current status and future directions, *Hydrol. Earth Syst. Sci.*, 21, 4169–4193, <https://doi.org/10.5194/hess-21-4169-2017>, 2017.
- Wood, E. F., Roundy, J. K., Troy, T. J., van Beek, L. P. H., Bierkens, M. F. P., Blyth, E., de Roo, A., Döll, P., Ek, M., Famiglietti, J., Gochis, D., van de Giesen, N., Houser, P., Jaffé, P. R., Kollet, S., Lehner, B., Lettenmaier, D. P., Peters-Lidard, C., Sivapalan, M., Sheffield, J., Wade, A., and Whitehead, P.: Hyperresolution global land surface modelling: Meeting a grand challenge for monitoring Earth’s terrestrial water, *Water Resour. Res.*, 47, W05301, <https://doi.org/10.1029/2010WR010090>, 2011.
- Zaherpour, J., Gosling, S. N., Mount, N., Müller Schmied, H., Veldkamp, T. I. E., Dankers, R., Eisner, S., Gerten, D.,

Gudmundsson, L., Haddeland, I., Hanasaki, N., Kim, H., Leng, G., Liu, J., Masaki, Y., Oki, T., Pokhrel, Y., Satoh, Y., Schewe, Ja., and Wada, Y.: Worldwide evaluation of mean and extreme runoff from six global-scale hydrological models that account for human impacts, *Environ. Res. Lett.*, 13, 1–18, 065015, <https://doi.org/10.1088/1748-9326/aac547>, 2018.

Zaherpour, J., Mount, N., Gosling, S.N., Dankers, R., Eisner, S., Gerten, D., Liu, X., Masaki, Y., Müller Schmied, H., Tang, Q. and Wada, Y.: Exploring the value of machine learning for weighted multi-model combination of an ensemble of global hydrological models. *Environmental modelling & software*, 114, 112-128, <https://doi.org/10.1016/j.envsoft.2019.01.003>, 2019.

Zekollari, H., Huss, M., and Farinotti, D.: Modelling the future evolution of glaciers in the European Alps under the EUROCORDEX RCM ensemble, *The Cryosphere*, 13, 1125–1146, <https://doi.org/10.5194/tc-13-1125-2019>, 2019.
